# Supplementary material for: First principles studies of CO2 and O2 chemisorption on La2O3 surfaces
Source: Royal Society of Chemistry journal article supplement (doi:10.1039/c7cp05471h), 2017-01-01
Supplement: c7cp05471h1.pdf [file c7cp05471h1.pdf]

## Electronic Supplementary Information

### First Principles Studies of CO<sub>2</sub> and O<sub>2</sub> Chemisorption on La<sub>2</sub>O<sub>3</sub> Surfaces

Shibin Wang,<sup>a,b,c</sup> Linna Cong,<sup>a,b,c</sup> Chengcheng Zhao,<sup>a,b,c</sup> Yiting Li,<sup>c</sup> Yaoqi Pang,<sup>c</sup> Yonghui Zhao,<sup>a</sup>  
Shenggang Li,<sup>a,c,\*</sup> Yuhan Sun<sup>a,c</sup>

<sup>a</sup> CAS Key Laboratory of Low-Carbon Conversion Science and Engineering, Shanghai Advanced Research Institute, Chinese Academy of Sciences, 100 Haike Road, Shanghai 201210, China

<sup>b</sup> University of Chinese Academy of Sciences, 19 Yuquan Road, Shijingshan District, Beijing 100049, China

<sup>c</sup> School of Physical Science and Technology, ShanghaiTech University, 100 Haike Road, Shanghai 201210, China

This supplementary information is divided into two sections, briefly summarized below.

**Section 1:** Additional figures:

**Figure S1.** An Additional CO<sub>2</sub> Chemisorption Structure and Energy for the La<sub>2</sub>O<sub>3</sub>(011) Surface

Closely Related to the (011)-II Structure in Figure 3.

**Figure S2.** CO<sub>2</sub> Chemisorption Structures and Energies for the p(2×2) Supercells of the

La<sub>2</sub>O<sub>3</sub>(011), (100), (110), (101), and (111) Surfaces.

**Figure S3.** Phase Diagrams (T/K vs. p<sub>CO2</sub>/bar) for the La<sub>2</sub>O<sub>3</sub>(011), (100), (110), (101), and (111)

Surfaces.

**Figure S4.** Additional O<sub>2</sub> Chemisorption Structures and Energies for the La<sub>2</sub>O<sub>3</sub> Surfaces Related to Those in Figure 6.

**Figure S5.** O<sub>2</sub> Chemisorption Structures and Energies for the p(2×2) Supercells of the La<sub>2</sub>O<sub>3</sub>(011), (100), (110), (101), and (111) Surfaces.

**Figure S6.** Additional O<sub>2</sub> Chemisorption Structures and Energies for the p(2×2) Supercells of the La<sub>2</sub>O<sub>3</sub>(011), (100), (110), (101), and (111) Surfaces.

**Figure S7.** Calculated Band Structures for Bulk La<sub>2</sub>O<sub>3</sub> and Its (001), (011), (100), (110), (101), and (111) Surfaces.

**Section 2:** Additional tables.

**Table S1.** Optimization of the Number of Repeating Units Based on the Calculated O<sub>2</sub> Dissociation Energies with the p(1×1) Unit Cell.

**Table S2.** Optimized Fractional Coordinates of Bulk La<sub>2</sub>O<sub>3</sub> and Its Surfaces Shown in Figure 1.

**Table S3.** Optimized Fractional Coordinates for the Stationary States Shown in Figure 2.

**Table S4.** Optimized Fractional Coordinates for the CO<sub>2</sub> Chemisorption Structures Shown in Figure 3.

**Table S5.** Optimized Fractional Coordinates for the Stationary States Shown in Figure 5.

**Table S6.** Optimized Fractional Coordinates for the O<sub>2</sub> Chemisorption States Shown in Figure 6.

**Figure S1.** An Additional CO<sub>2</sub> Chemisorption Structure and Energy (eV) for the La<sub>2</sub>O<sub>3</sub>(011) Surface Calculated at the PBE Level, Which Is Closely Related to the (011)-II Structure in Figure 3.

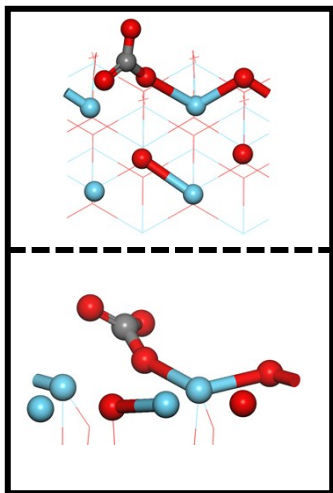

(011)-III: -1.02

**Figure S2.** CO<sub>2</sub> Chemisorption Structures and Energies (eV) for the p(2×2) Supercells of the La<sub>2</sub>O<sub>3</sub>(011), (100), (110), (101), and (111) Surfaces Calculated at the PBE Level. The Labels of These Structures Correspond to Those in Figures 3 and S1, with Additional Structures Labeled with Higher Numbers.

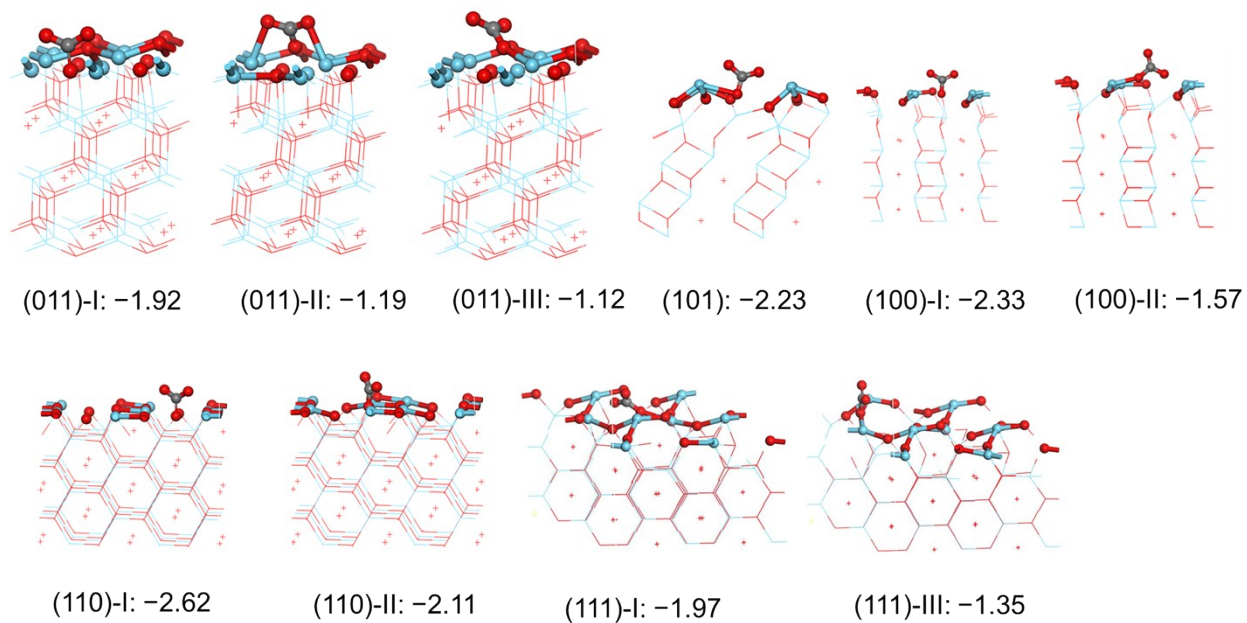

**Figure S3.** Phase diagrams (T/K vs.  $p_{\text{CO}_2}$ /bar) for the  $\text{La}_2\text{O}_3$ (011), (100), (110), (101), and (111) surfaces (Figure 1, blue) in equilibrium with the carbonate-covered (011)-I, (100), (110)-I, and (101)-I surfaces (0.5–1 ML, Figure 3, red; 0.25 ML, Figure S2, green) under the  $\text{CO}_2$  environment.

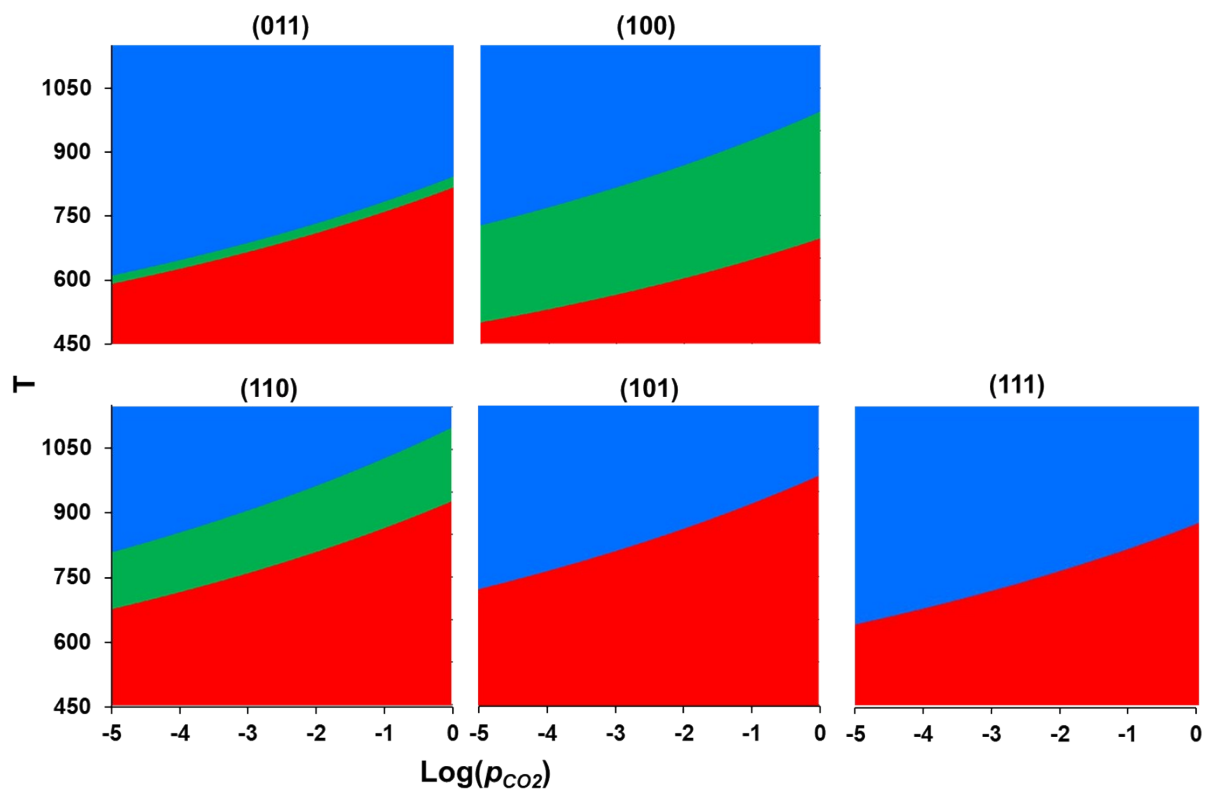

**Figure S4.** Additional O<sub>2</sub> Chemisorption Structures and Energies (eV) for the La<sub>2</sub>O<sub>3</sub> Surfaces Calculated at the PBE Level, Which Are Related to Those in Figure 6. The (011)-III Structure, Which Is Closely Related to (011)-I Structure, Was Predicted to Be Lower in Energy than the (011)-II Structure in Figure 6.

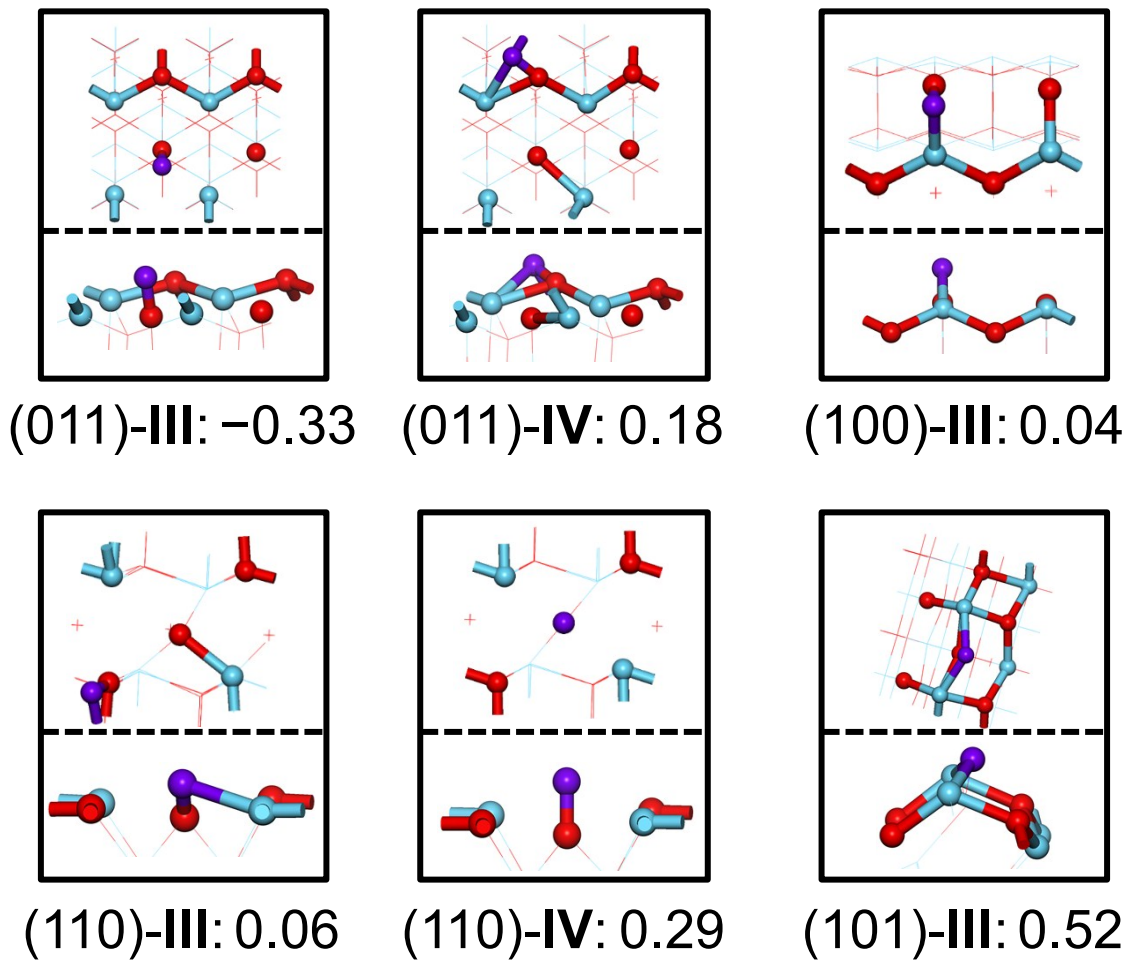

**Figure S5.** O<sub>2</sub> Chemisorption Structures and Energies (eV) for the p(2×2) Supercells of the La<sub>2</sub>O<sub>3</sub>(011), (100), (110), (101), and (111) Surfaces Calculated at the PBE Level. The Labels of These Structures Correspond to Those in Figures 6.

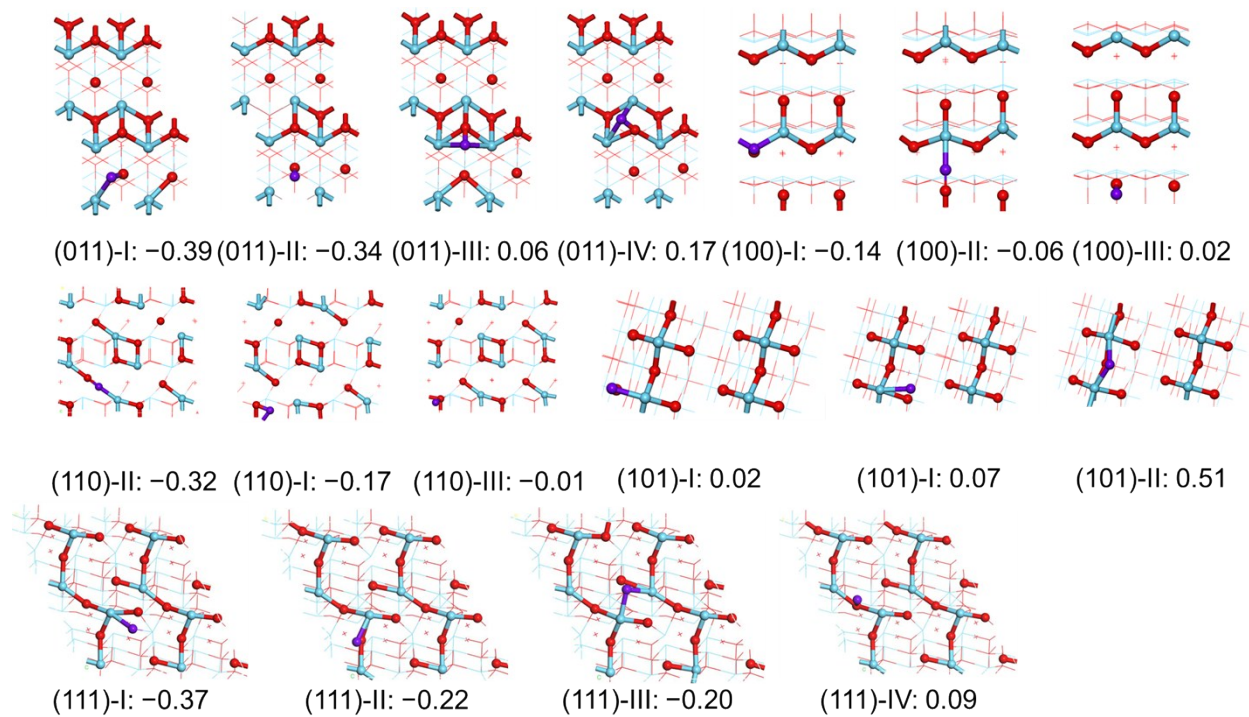

**Figure S6.** Additional O<sub>2</sub> Chemisorption Structures and Energies (eV) for the p(2×2) Supercells of the La<sub>2</sub>O<sub>3</sub>(011), (100), (110), and (101) Surfaces Calculated at the PBE Level. The Labels of These Structures Correspond to Those in Figures S4, with Additional Structures Labeled with Higher Numbers.

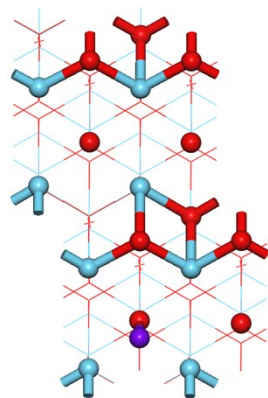

(011)-III: -0.34

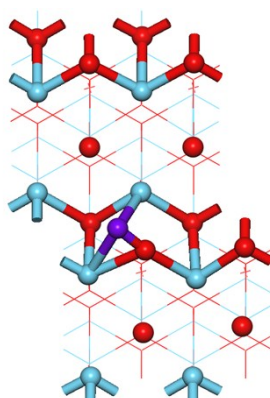

(011)-IV: 0.17

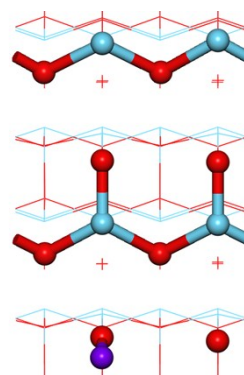

(100)-III: 0.02

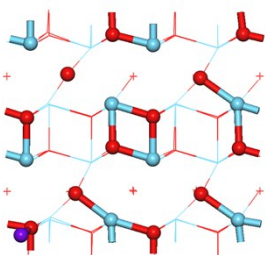

(110)-III: -0.01

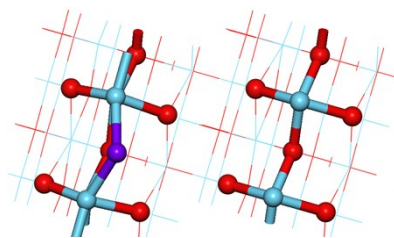

(101)-III: 0.51



**Figure S7.** Calculated Band Structures for Bulk  $\text{La}_2\text{O}_3$  and Its (001), (011), (100), (110), (101), and (111) Surfaces.

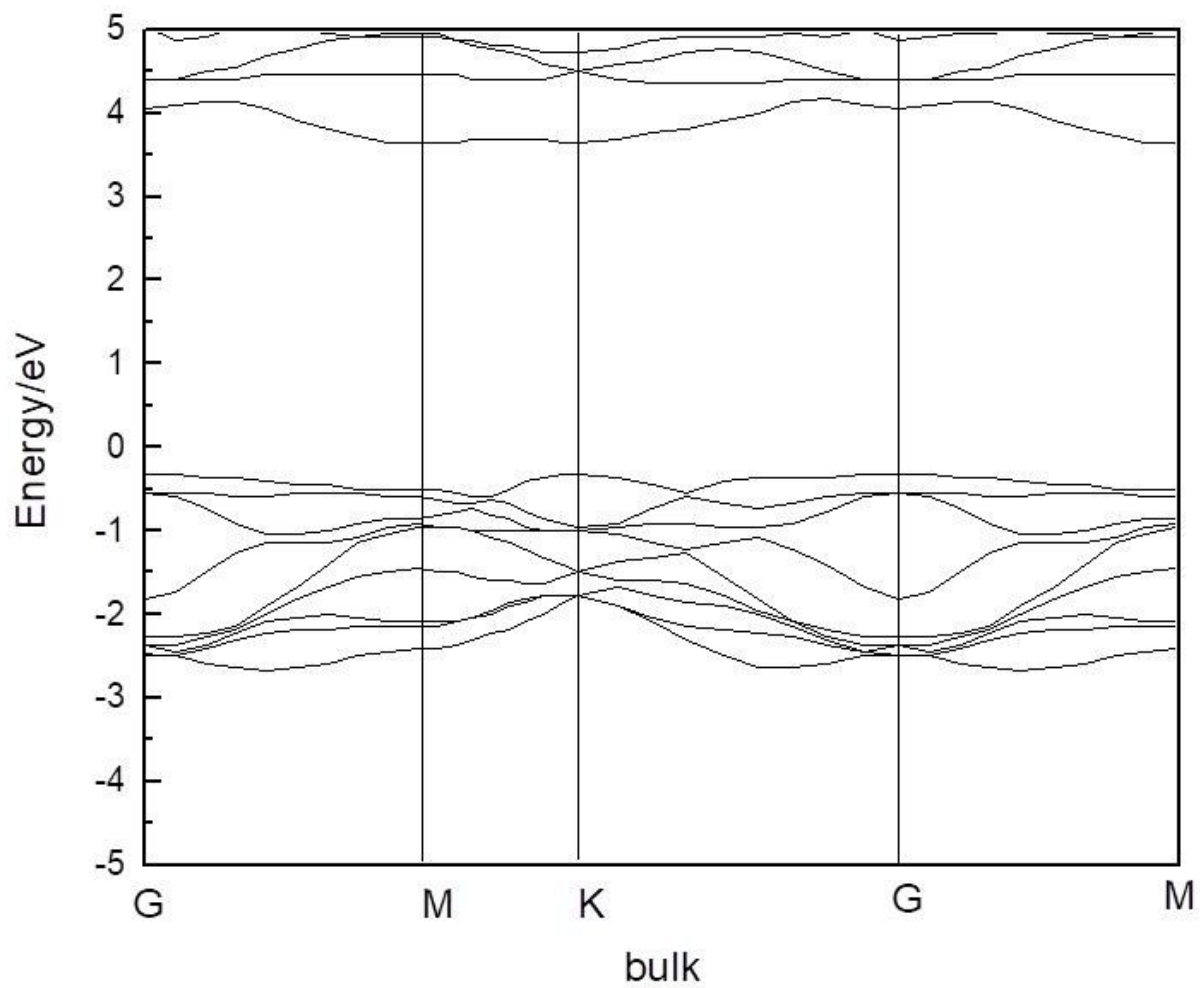

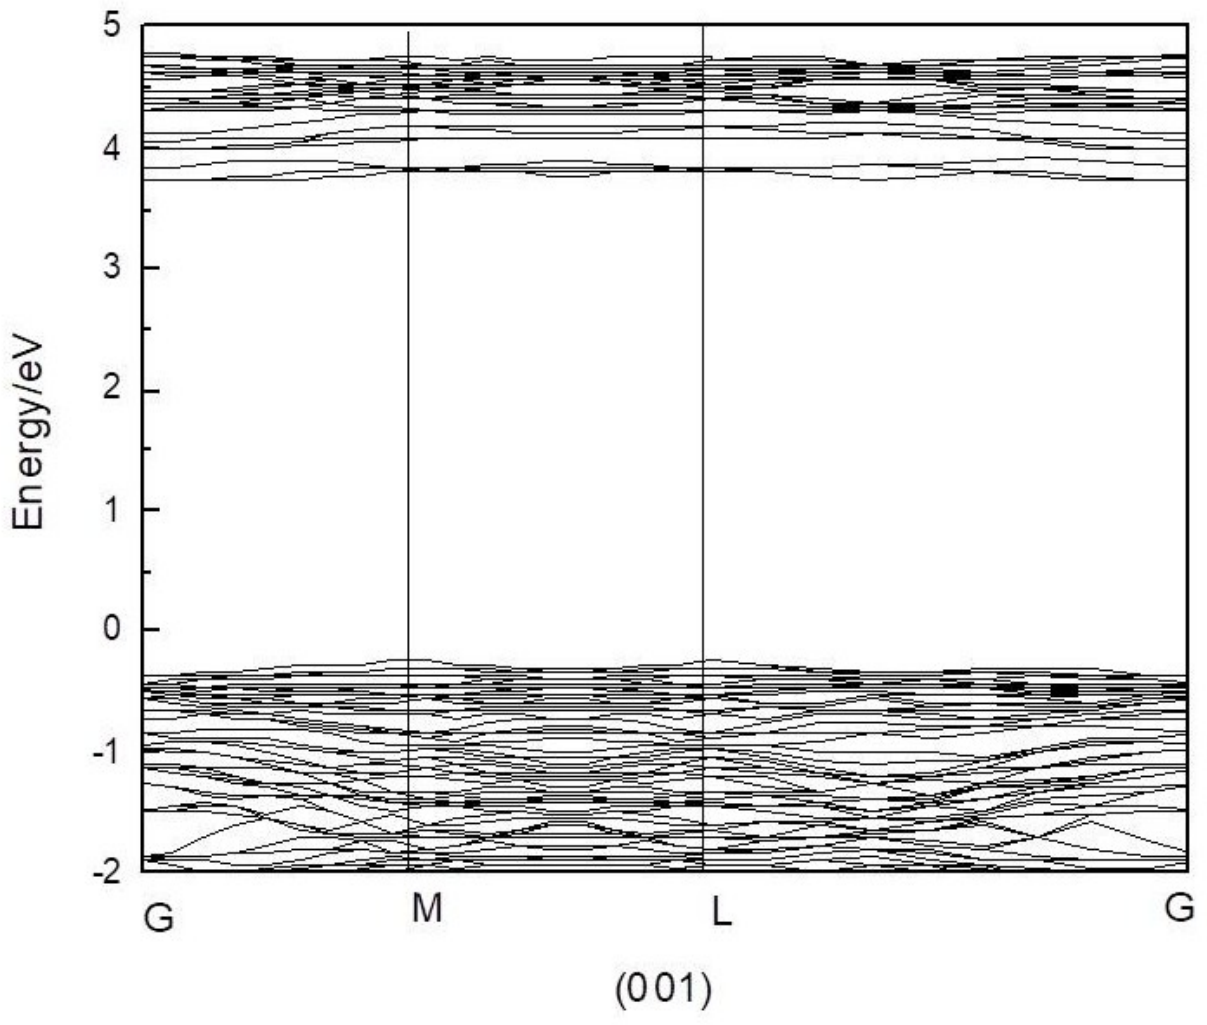

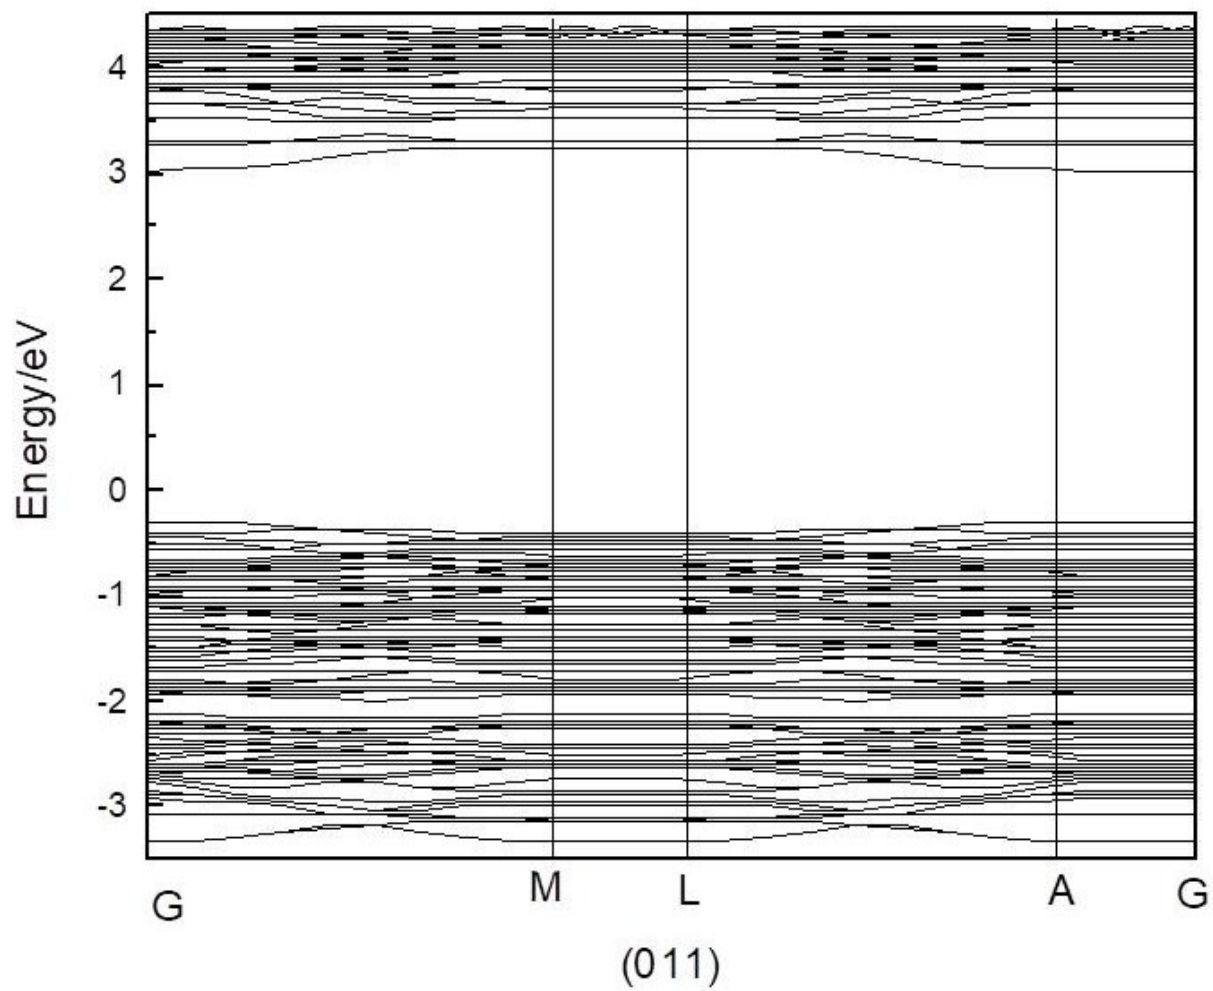

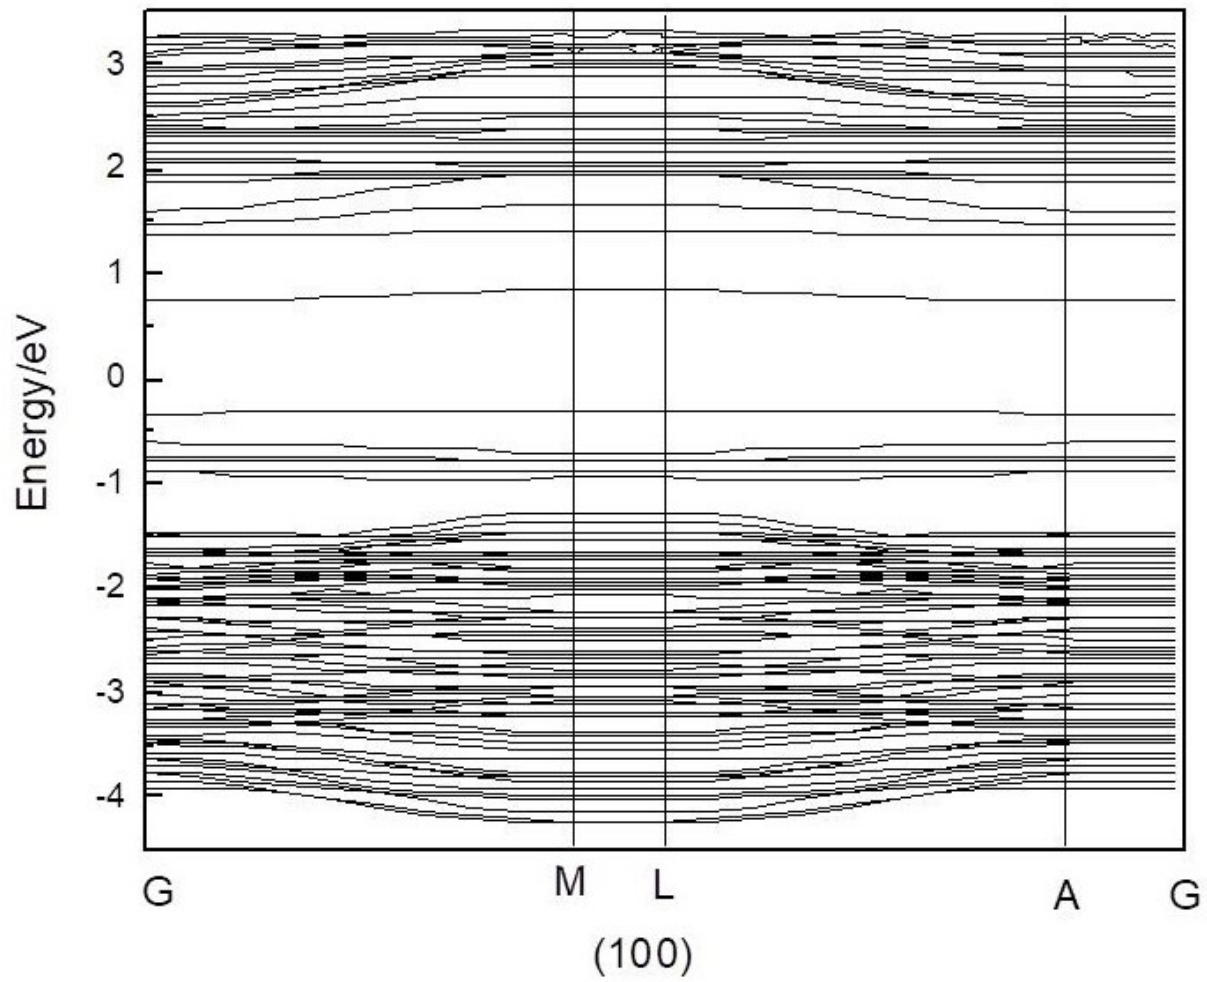

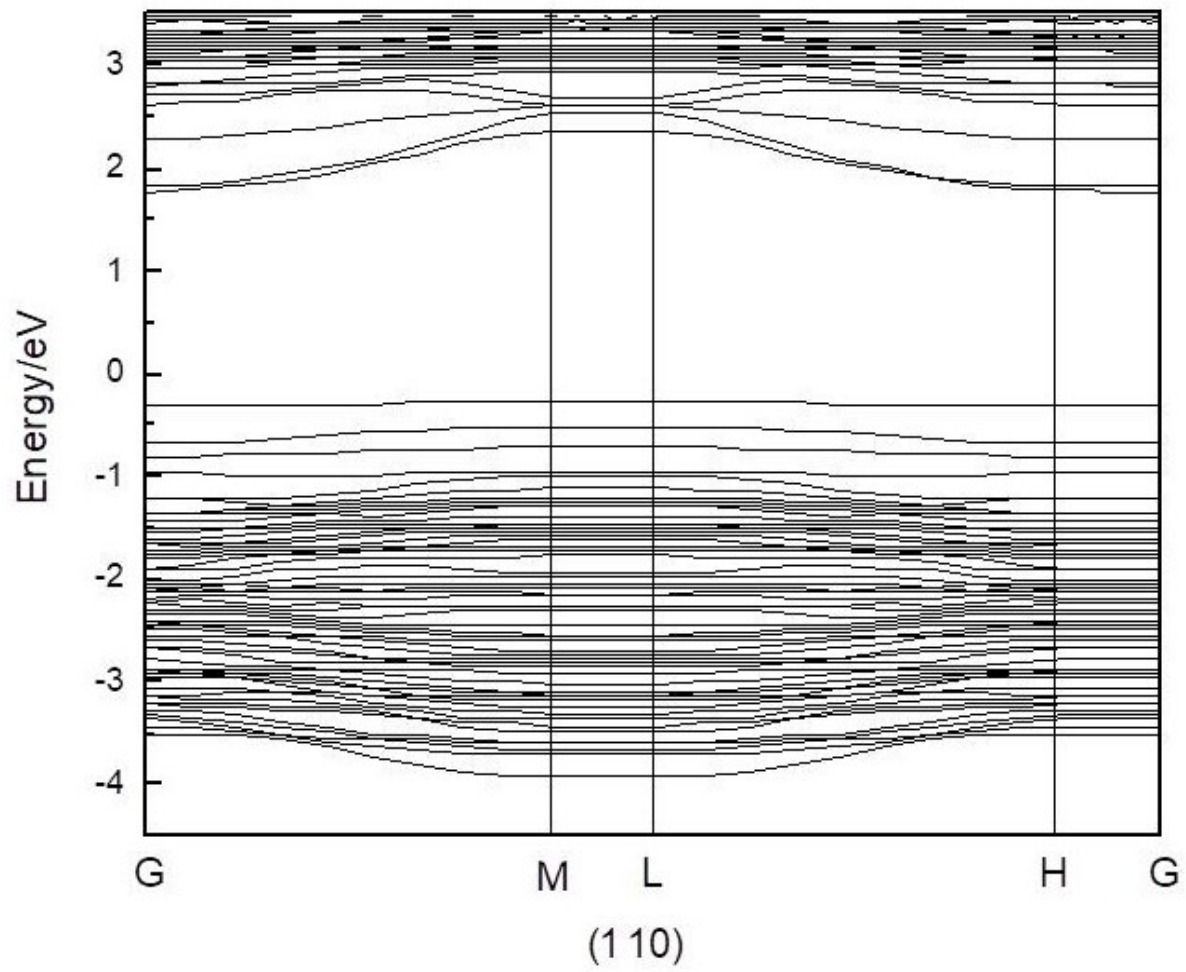

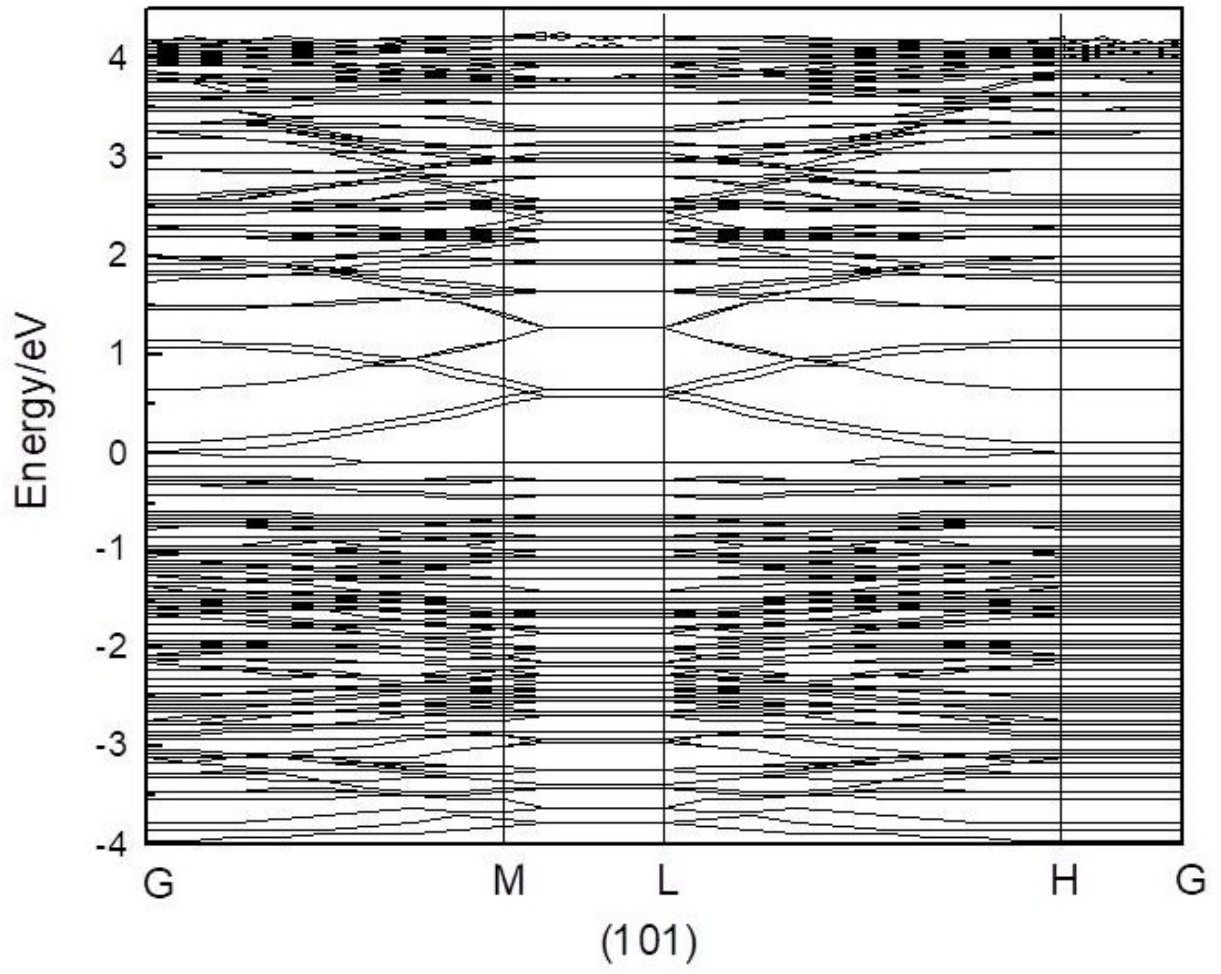

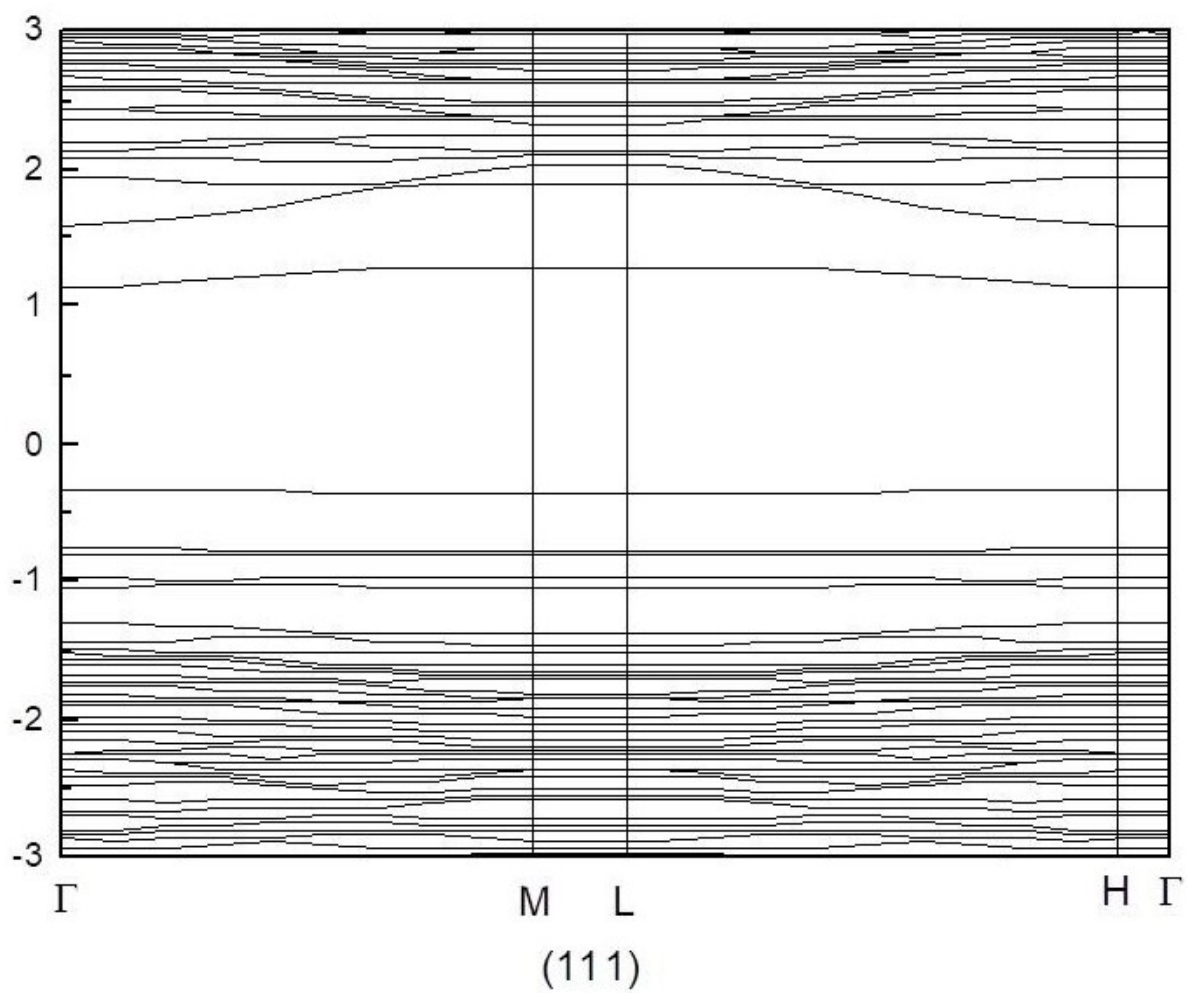

**Table S1.** Optimization of the Number of Repeating Units Based on the Calculated O<sub>2</sub> Dissociation Energies with the p(1×1) Unit Cell.

| Number of Repeating Units | Structure 1 | Structure 2 | Structure 3 | Structure 4 |
|---------------------------|-------------|-------------|-------------|-------------|
| <b>(001)</b>              |             |             |             |             |
| 2                         | 0.265       |             |             |             |
| 4                         | 0.266       |             |             |             |
| 6                         | 0.266       |             |             |             |
| <b>(011)</b>              |             |             |             |             |
| 2                         | -0.267      | -0.182      | 0.105       | 0.327       |
| 4                         | -0.368      | -0.318      | 0.136       | 0.320       |
| 6                         | -0.361      | -0.312      | 0.136       | 0.321       |
| <b>(100)</b>              |             |             |             |             |
| 2                         | -0.132      | -0.079      | 0.111       |             |
| 4                         | -0.104      | -0.067      | 0.168       |             |
| 6                         | -0.107      | -0.067      | 0.171       |             |
| <b>(110)</b>              |             |             |             |             |
| 2                         | 0.474       | 0.468       | 0.757       |             |
| 4                         | 0.007       | 0.094       | 0.294       |             |
| 6                         | -0.014      | 0.057       | 0.292       |             |
| 8                         | -0.015      | 0.059       | 0.297       |             |
| <b>(101)</b>              |             |             |             |             |
| 2                         | 0.148       | 0.205       | 0.859       |             |
| 4                         | 0.165       | 0.285       | 0.626       |             |
| 6                         | 0.159       | 0.282       | 0.618       |             |
| <b>(111)</b>              |             |             |             |             |
| 4                         | -0.364      | -0.172      | -0.091      | 0.189       |
| 6                         | -0.363      | -0.206      | -0.126      | 0.139       |
| 8                         | -0.356      | -0.245      | -0.134      | 0.141       |



**Table S2.** Optimized Fractional Coordinates of Bulk  $\text{La}_2\text{O}_3$  and Its Surfaces Shown in Figure 1.

**$\text{La}_2\text{O}_3$  Bulk**

|                     |                     |                    |  |                     |
|---------------------|---------------------|--------------------|--|---------------------|
| La                  | O                   |                    |  |                     |
| 1.0000000000000000  |                     |                    |  |                     |
| 3.4116974049199555  | -1.9697444151240839 |                    |  | -0.0000000000000000 |
| 0.0000000000000000  | 3.9394888302481679  |                    |  | 0.0000000000000000  |
| -0.0000000000000000 | 0.0000000000000000  |                    |  | 6.1838024734529302  |
| La                  | O                   |                    |  |                     |
| 2                   | 3                   |                    |  |                     |
| Direct              |                     |                    |  |                     |
| 0.3333333333333357  | 0.6666666666666643  | 0.2473852580061383 |  |                     |
| 0.6666666666666643  | 0.3333333333333357  | 0.7526147419938617 |  |                     |
| 0.0000000000000000  | -0.0000000000000000 | 0.0000000000000000 |  |                     |
| 0.3333333333333357  | 0.6666666666666643  | 0.6454421768759356 |  |                     |
| 0.6666666666666643  | 0.3333333333333357  | 0.3545578231240644 |  |                     |

**Figure 1(a):  $\text{La}_2\text{O}_3(001)$ ,  $p(2 \times 2)$**

|                     |                     |                     |   |   |   |
|---------------------|---------------------|---------------------|---|---|---|
| O                   | La                  |                     |   |   |   |
| 1.0000000000000000  |                     |                     |   |   |   |
| 7.8789800000000003  | 0.0000000000000000  | 0.0000000000000000  |   |   |   |
| -3.9394900000000002 | 6.8233968359095165  | 0.0000000000000000  |   |   |   |
| 0.0000000000000000  | 0.0000000000000000  | 25.5688315207999963 |   |   |   |
| O                   | La                  |                     |   |   |   |
| 24                  | 16                  |                     |   |   |   |
| Selective dynamics  |                     |                     |   |   |   |
| Direct              |                     |                     |   |   |   |
| 0.0000000000000000  | 0.0000000000000000  | 0.3790754283204265  | F | F | F |
| 0.16666666666666714 | 0.3333333333333286  | 0.2933258797492897  | F | F | F |
| 0.3333333333333286  | 0.16666666666666714 | 0.4648249768915562  | F | F | F |
| 0.0000000000000000  | 0.0000000000000000  | 0.6206837706312953  | T | T | T |
| 0.16666666666666714 | 0.3333333333333286  | 0.5352302760047607  | T | T | T |
| 0.3333333333333286  | 0.16666666666666714 | 0.7050789635715589  | T | T | T |
| 0.0000000000000000  | 0.5000000000000000  | 0.3790754283204265  | F | F | F |
| 0.16666666666666714 | 0.8333333333333357  | 0.2933258797492897  | F | F | F |
| 0.3333333333333357  | 0.66666666666666714 | 0.4648249768915562  | F | F | F |
| 0.0000000000000000  | 0.5000000000000000  | 0.6206837706312953  | T | T | T |
| 0.16666666666666714 | 0.8333333333333357  | 0.5352302760047607  | T | T | T |
| 0.3333333333333357  | 0.66666666666666714 | 0.7050789635715589  | T | T | T |
| 0.5000000000000000  | 0.0000000000000000  | 0.3790754283204265  | F | F | F |
| 0.66666666666666714 | 0.3333333333333286  | 0.2933258797492897  | F | F | F |
| 0.8333333333333286  | 0.16666666666666714 | 0.4648249768915562  | F | F | F |
| 0.5000000000000000  | 0.0000000000000000  | 0.6206837706312953  | T | T | T |
| 0.66666666666666714 | 0.3333333333333286  | 0.5352302760047607  | T | T | T |
| 0.8333333333333286  | 0.16666666666666714 | 0.7050789635715589  | T | T | T |
| 0.5000000000000000  | 0.5000000000000000  | 0.3790754283204265  | F | F | F |
| 0.66666666666666714 | 0.8333333333333357  | 0.2933258797492897  | F | F | F |
| 0.8333333333333286  | 0.66666666666666714 | 0.4648249768915562  | F | F | F |
| 0.5000000000000000  | 0.5000000000000000  | 0.6206837706312953  | T | T | T |
| 0.66666666666666714 | 0.8333333333333357  | 0.5352302760047607  | T | T | T |
| 0.8333333333333286  | 0.66666666666666714 | 0.7050789635715589  | T | T | T |
| 0.16666666666666714 | 0.3333333333333286  | 0.4389052786503242  | F | F | F |
| 0.3333333333333286  | 0.16666666666666714 | 0.3192455779905217  | F | F | F |

|                     |                     |                    |   |   |   |
|---------------------|---------------------|--------------------|---|---|---|
| 0.16666666666666714 | 0.3333333333333286  | 0.6810249590977548 | T | T | T |
| 0.3333333333333286  | 0.16666666666666714 | 0.5612805770190477 | T | T | T |
| 0.16666666666666714 | 0.8333333333333357  | 0.4389052786503242 | F | F | F |
| 0.3333333333333357  | 0.66666666666666714 | 0.3192455779905217 | F | F | F |
| 0.16666666666666714 | 0.8333333333333357  | 0.6810249590977548 | T | T | T |
| 0.3333333333333357  | 0.66666666666666714 | 0.5612805770190477 | T | T | T |
| 0.66666666666666714 | 0.3333333333333286  | 0.4389052786503242 | F | F | F |
| 0.8333333333333286  | 0.16666666666666714 | 0.3192455779905217 | F | F | F |
| 0.66666666666666714 | 0.3333333333333286  | 0.6810249590977548 | T | T | T |
| 0.8333333333333286  | 0.16666666666666714 | 0.5612805770190477 | T | T | T |
| 0.66666666666666714 | 0.8333333333333357  | 0.4389052786503242 | F | F | F |
| 0.8333333333333286  | 0.66666666666666714 | 0.3192455779905217 | F | F | F |
| 0.66666666666666714 | 0.8333333333333357  | 0.6810249590977548 | T | T | T |
| 0.8333333333333286  | 0.66666666666666714 | 0.5612805770190477 | T | T | T |

**Figure 1(b): La<sub>2</sub>O<sub>3</sub>(011), p(2×1)**

O La

|                     |                    |                     |
|---------------------|--------------------|---------------------|
| 1.0000000000000000  |                    |                     |
| 7.8789800000000003  | 0.0000000000000000 | 0.0000000000000000  |
| -1.9697450000000001 | 7.0625114891995047 | 0.0000000000000000  |
| 0.0000000000000000  | 0.0000000000000000 | 25.8263268595284643 |

O La  
24 16

Selective dynamics

Direct

|                    |                    |                    |   |   |   |
|--------------------|--------------------|--------------------|---|---|---|
| 0.4041697660885788 | 0.6166790643543223 | 0.3265015826258235 | F | F | F |
| 0.0110175396903500 | 0.0440701587614001 | 0.3626018224361118 | F | F | F |
| 0.2973219924868076 | 0.1892879699472374 | 0.2904013428155352 | F | F | F |
| 0.2125092982657435 | 0.8500371930629598 | 0.4421671942086078 | F | F | F |
| 0.3193570718675147 | 0.2774282874700376 | 0.4782674340188962 | F | F | F |
| 0.1056615246639652 | 0.4226460986558749 | 0.4060669543983195 | F | F | F |
| 0.0209463572325674 | 0.0837854289302697 | 0.5627620831423386 | T | T | T |
| 0.1299444777812155 | 0.5197779111248479 | 0.5947003353976115 | T | T | T |
| 0.4152800144615441 | 0.6611200578461620 | 0.5213594595512276 | T | T | T |
| 0.3238122028332384 | 0.2952488113329466 | 0.6655198830799591 | T | T | T |
| 0.4378515926514197 | 0.7514063706056575 | 0.7065011146738698 | T | T | T |
| 0.2217328727110655 | 0.8869314908442618 | 0.6365382435538365 | T | T | T |
| 0.9041697660885788 | 0.6166790643543223 | 0.3265015826258235 | F | F | F |
| 0.5110175396903500 | 0.0440701587614001 | 0.3626018224361118 | F | F | F |
| 0.7973219924868076 | 0.1892879699472374 | 0.2904013428155352 | F | F | F |
| 0.7125092982657435 | 0.8500371930629598 | 0.4421671942086078 | F | F | F |
| 0.8193570718675147 | 0.2774282874700376 | 0.4782674340188962 | F | F | F |
| 0.6056615246639723 | 0.4226460986558749 | 0.4060669543983195 | F | F | F |
| 0.5209463572325674 | 0.0837854289302697 | 0.5627620831423386 | T | T | T |
| 0.6299444777812155 | 0.5197779111248479 | 0.5947003353976115 | T | T | T |
| 0.9152800144615441 | 0.6611200578461620 | 0.5213594595512276 | T | T | T |
| 0.8238122028332384 | 0.2952488113329466 | 0.6655198830799591 | T | T | T |
| 0.9378515926514197 | 0.7514063706056575 | 0.7065011146738698 | T | T | T |
| 0.7217328727110655 | 0.8869314908442618 | 0.6365382435538365 | T | T | T |
| 0.0873093305305090 | 0.3492373221220291 | 0.3165603160863029 | F | F | F |
| 0.2210302016466557 | 0.8841208065866084 | 0.3364428491653442 | F | F | F |
| 0.3956488627076666 | 0.5825954508306666 | 0.4322259276690872 | F | F | F |
| 0.0293697338238132 | 0.1174789352952530 | 0.4521084607481285 | F | F | F |
| 0.2045332244869513 | 0.8181328979478124 | 0.5478162324360270 | T | T | T |
| 0.3388184684896132 | 0.3552738739584527 | 0.5697677224578115 | T | T | T |
| 0.0122838765151556 | 0.0491355060606082 | 0.6612419757357912 | T | T | T |

|                    |                    |                    |   |   |   |
|--------------------|--------------------|--------------------|---|---|---|
| 0.1494675664277452 | 0.5978702657109949 | 0.6830634168174470 | T | T | T |
| 0.5873093305305019 | 0.3492373221220291 | 0.3165603160863029 | F | F | F |
| 0.7210302016466557 | 0.8841208065866084 | 0.3364428491653442 | F | F | F |
| 0.8956488627076666 | 0.5825954508306666 | 0.4322259276690872 | F | F | F |
| 0.5293697338238132 | 0.1174789352952530 | 0.4521084607481285 | F | F | F |
| 0.7045332244869513 | 0.8181328979478124 | 0.5478162324360270 | T | T | T |
| 0.8388184684896132 | 0.3552738739584527 | 0.5697677224578115 | T | T | T |
| 0.5122838765151556 | 0.0491355060606082 | 0.6612419757357912 | T | T | T |
| 0.6494675664277452 | 0.5978702657109949 | 0.6830634168174470 | T | T | T |

**Figure 1(c): La<sub>2</sub>O<sub>3</sub>(100), p(2×1)**

O La

|                    |                    |                     |  |  |  |
|--------------------|--------------------|---------------------|--|--|--|
| 1.0000000000000000 |                    |                     |  |  |  |
| 7.8789800000000003 | 0.0000000000000000 | 0.0000000000000000  |  |  |  |
| 0.0000000000000000 | 6.1837999999999997 | 0.0000000000000000  |  |  |  |
| 0.0000000000000000 | 0.0000000000000000 | 27.5095608658341177 |  |  |  |

O La  
24 16

Selective dynamics

Direct

|                    |                    |                    |   |   |   |
|--------------------|--------------------|--------------------|---|---|---|
| 0.3750000000000000 | 0.5000000000000000 | 0.3139720349630153 | F | F | F |
| 0.1250000000000000 | 0.1454420000000027 | 0.3553115827490103 | F | F | F |
| 0.1250000000000000 | 0.8545579999999973 | 0.2726324871770203 | F | F | F |
| 0.1250000000000000 | 0.5000000000000000 | 0.4379906783210075 | F | F | F |
| 0.3750000000000000 | 0.1454420000000027 | 0.4793302261070025 | F | F | F |
| 0.3750000000000000 | 0.8545579999999973 | 0.3966511305350124 | F | F | F |
| 0.3750000000000000 | 0.5101956642992533 | 0.5576528012902244 | T | T | T |
| 0.1250000000000000 | 0.1535363141919177 | 0.6078795815743092 | T | T | T |
| 0.1250000000000000 | 0.8622295020693755 | 0.5209432937096565 | T | T | T |
| 0.1250000000000000 | 0.5577280848488684 | 0.6883056474959304 | T | T | T |
| 0.3750000000000000 | 0.0685890119316568 | 0.7269487361905504 | T | T | T |
| 0.3750000000000000 | 0.8400826252327320 | 0.6411935283526233 | T | T | T |
| 0.8750000000000000 | 0.5000000000000000 | 0.3139720349630153 | F | F | F |
| 0.6250000000000000 | 0.1454420000000027 | 0.3553115827490103 | F | F | F |
| 0.6250000000000000 | 0.8545579999999973 | 0.2726324871770203 | F | F | F |
| 0.6250000000000000 | 0.5000000000000000 | 0.4379906783210075 | F | F | F |
| 0.8750000000000000 | 0.1454420000000027 | 0.4793302261070025 | F | F | F |
| 0.8750000000000000 | 0.8545579999999973 | 0.3966511305350124 | F | F | F |
| 0.8750000000000000 | 0.5101956642992533 | 0.5576528012902244 | T | T | T |
| 0.6250000000000000 | 0.1535363141919177 | 0.6078795815743092 | T | T | T |
| 0.6250000000000000 | 0.8622295020693755 | 0.5209432937096565 | T | T | T |
| 0.6250000000000000 | 0.5577280848488684 | 0.6883056474959304 | T | T | T |
| 0.8750000000000000 | 0.0685890119316568 | 0.7269487361905504 | T | T | T |
| 0.8750000000000000 | 0.8400826252327320 | 0.6411935283526233 | T | T | T |
| 0.1250000000000000 | 0.7473850000000013 | 0.3553115827490103 | F | F | F |
| 0.1250000000000000 | 0.2526149999999987 | 0.2726324871770203 | F | F | F |
| 0.3750000000000000 | 0.7473850000000013 | 0.4793302261070025 | F | F | F |
| 0.3750000000000000 | 0.2526149999999987 | 0.3966511305350124 | F | F | F |
| 0.1250000000000000 | 0.7332447342073536 | 0.6004183617653354 | T | T | T |
| 0.1250000000000000 | 0.2515567820036182 | 0.5213274067156419 | T | T | T |
| 0.3750000000000000 | 0.7257421713467167 | 0.7195314323197195 | T | T | T |
| 0.3750000000000000 | 0.2215794469269170 | 0.6528683418881656 | T | T | T |
| 0.6250000000000000 | 0.7473850000000013 | 0.3553115827490103 | F | F | F |
| 0.6250000000000000 | 0.2526149999999987 | 0.2726324871770203 | F | F | F |
| 0.8750000000000000 | 0.7473850000000013 | 0.4793302261070025 | F | F | F |
| 0.8750000000000000 | 0.2526149999999987 | 0.3966511305350124 | F | F | F |

|                    |                    |                    |   |   |   |
|--------------------|--------------------|--------------------|---|---|---|
| 0.6250000000000000 | 0.7332447342073536 | 0.6004183617653354 | T | T | T |
| 0.6250000000000000 | 0.2515567820036182 | 0.5213274067156419 | T | T | T |
| 0.8750000000000000 | 0.7257421713467167 | 0.7195314323197195 | T | T | T |
| 0.8750000000000000 | 0.2215794469269170 | 0.6528683418881656 | T | T | T |

**Figure 1(d): La<sub>2</sub>O<sub>3</sub>(110), p(1×1)**

O La

|                    |                    |                     |  |  |  |
|--------------------|--------------------|---------------------|--|--|--|
| 1.0000000000000000 |                    |                     |  |  |  |
| 6.8233968359095165 | 0.0000000000000000 | 0.0000000000000000  |  |  |  |
| 0.0000000000000000 | 6.1837999999999997 | 0.0000000000000000  |  |  |  |
| 0.0000000000000000 | 0.0000000000000000 | 24.8487250000000017 |  |  |  |

O La

|    |    |  |  |  |  |
|----|----|--|--|--|--|
| 18 | 12 |  |  |  |  |
|----|----|--|--|--|--|

Selective dynamics

Direct

|                    |                    |                    |   |   |   |
|--------------------|--------------------|--------------------|---|---|---|
| 0.0000000000000000 | 0.5000000000000000 | 0.3018263512514210 | F | F | F |
| 0.3333333333333357 | 0.8545579999999973 | 0.3018263512514210 | F | F | F |
| 0.6666666666666643 | 0.1454420000000027 | 0.3018263512514210 | F | F | F |
| 0.5000000000000000 | 0.5000000000000000 | 0.3810958107508498 | F | F | F |
| 0.8333333333333357 | 0.8545579999999973 | 0.3810958107508498 | F | F | F |
| 0.1666666666666643 | 0.1454420000000027 | 0.3810958107508498 | F | F | F |
| 0.0000000000000000 | 0.5000000000000000 | 0.4603652702502856 | F | F | F |
| 0.3333333333333357 | 0.8545579999999973 | 0.4603652702502856 | F | F | F |
| 0.6666666666666643 | 0.1454420000000027 | 0.4603652702502856 | F | F | F |
| 0.5000000000000000 | 0.5000000000000000 | 0.5371347587154673 | T | T | T |
| 0.8367698155022723 | 0.8498590053713997 | 0.5389868928471344 | T | T | T |
| 0.1632301844977277 | 0.1501409946286003 | 0.5389868928471344 | T | T | T |
| 0.0000000000000000 | 0.5000000000000000 | 0.6287446622640616 | T | T | T |
| 0.3244361859531466 | 0.8613473411541506 | 0.6190640561905880 | T | T | T |
| 0.6755638140468534 | 0.1386526588458494 | 0.6190640561905880 | T | T | T |
| 0.5000000000000000 | 0.5000000000000000 | 0.6801360352225529 | T | T | T |
| 0.8415679729295107 | 0.8645680076307656 | 0.7000063927747959 | T | T | T |
| 0.1584320270704893 | 0.1354319923692344 | 0.7000063927747959 | T | T | T |
| 0.3333333333333357 | 0.2526149999999987 | 0.3018263512514210 | F | F | F |
| 0.6666666666666643 | 0.7473850000000013 | 0.3018263512514210 | F | F | F |
| 0.8333333333333357 | 0.2526149999999987 | 0.3810958107508498 | F | F | F |
| 0.1666666666666643 | 0.7473850000000013 | 0.3810958107508498 | F | F | F |
| 0.3333333333333357 | 0.2526149999999987 | 0.4603652702502856 | F | F | F |
| 0.6666666666666643 | 0.7473850000000013 | 0.4603652702502856 | F | F | F |
| 0.8313274659844865 | 0.2483512966935280 | 0.5379894754827177 | T | T | T |
| 0.1686725340155135 | 0.7516487033064720 | 0.5379894754827177 | T | T | T |
| 0.3324153020609231 | 0.2594651218275956 | 0.6225903589867627 | T | T | T |
| 0.6675846979390769 | 0.7405348781724044 | 0.6225903589867627 | T | T | T |
| 0.8329891729758074 | 0.2377469817433351 | 0.6939405913343819 | T | T | T |
| 0.1670108270241926 | 0.7622530182566649 | 0.6939405913343819 | T | T | T |

**Figure 1(e): La<sub>2</sub>O<sub>3</sub>(101), p(1×2)**

O La

|                    |                    |                     |  |
|--------------------|--------------------|---------------------|--|
| 1.0000000000000000 |                    |                     |  |
| 7.3320504567344598 | 0.0000000000000000 | 0.0000000000000000  |  |
| 2.1166768493587393 | 7.5893349481880668 | 0.0000000000000000  |  |
| 0.0000000000000000 | 0.0000000000000000 | 26.4666250656236741 |  |

O La

|    |    |  |  |
|----|----|--|--|
| 24 | 16 |  |  |
|----|----|--|--|

Selective dynamics

Direct

|                    |                    |                    |   |   |   |
|--------------------|--------------------|--------------------|---|---|---|
| 0.6166790643543223 | 0.0958302339114212 | 0.3306989717953783 | F | F | F |
| 0.9662841158585209 | 0.2584289710353715 | 0.3283033998687301 | F | F | F |
| 0.2670740128501166 | 0.4332314967874709 | 0.3330945437220194 | F | F | F |
| 0.8500371930629598 | 0.2874907017342565 | 0.4435663239317904 | F | F | F |
| 0.1996422445671584 | 0.4500894388582140 | 0.4411707520051493 | F | F | F |
| 0.5004321415587540 | 0.1248919646103062 | 0.4459618958584386 | F | F | F |
| 0.0945824452507011 | 0.4763683352071668 | 0.5597763478321337 | T | T | T |
| 0.4414902833905449 | 0.1396626976348886 | 0.5492664809194773 | T | T | T |
| 0.7447098985454413 | 0.3138468152925813 | 0.5626242243004430 | T | T | T |
| 0.3315138107972794 | 0.1671807031764188 | 0.6565948306992762 | T | T | T |
| 0.6314513150237464 | 0.3422031763014593 | 0.6706271311533920 | T | T | T |
| 0.9013447646556004 | 0.0247339892838942 | 0.6772399671884796 | T | T | T |
| 0.6166790643543223 | 0.5958302339114212 | 0.3306989717953783 | F | F | F |
| 0.9662841158585209 | 0.7584289710353715 | 0.3283033998687301 | F | F | F |
| 0.2670740128501166 | 0.9332314967874709 | 0.3330945437220194 | F | F | F |
| 0.8500371930629598 | 0.7874907017342565 | 0.4435663239317904 | F | F | F |
| 0.1996422445671584 | 0.9500894388582140 | 0.4411707520051493 | F | F | F |
| 0.5004321415587540 | 0.6248919646103133 | 0.4459618958584386 | F | F | F |
| 0.0945824452507011 | 0.9763683352071669 | 0.5597763478321337 | T | T | T |
| 0.4414902833905449 | 0.6396626976348885 | 0.5492664809194773 | T | T | T |
| 0.7447098985454413 | 0.8138468152925816 | 0.5626242243004430 | T | T | T |
| 0.3315138107972794 | 0.6671807031764191 | 0.6565948306992762 | T | T | T |
| 0.6314513150237464 | 0.8422031763014596 | 0.6706271311533920 | T | T | T |
| 0.9013447646556004 | 0.5247339892838940 | 0.6772399671884796 | T | T | T |
| 0.2714512792191499 | 0.1821371801952125 | 0.2833757602793625 | F | F | F |
| 0.9619068494894876 | 0.0095232876276299 | 0.3780221833113870 | F | F | F |
| 0.5048094079277874 | 0.3737976480180549 | 0.3962431124157817 | F | F | F |
| 0.1952649781981322 | 0.2011837554504723 | 0.4908895354477991 | F | F | F |
| 0.7415372075469049 | 0.0646294654155790 | 0.5101202495644676 | T | T | T |
| 0.4121628623943770 | 0.3969930862490161 | 0.5988508970346734 | T | T | T |
| 0.9632966302007805 | 0.2592491854333706 | 0.6308231755242097 | T | T | T |
| 0.5944235915244526 | 0.1014645383520807 | 0.7059680284256874 | T | T | T |
| 0.2714512792191499 | 0.6821371801952125 | 0.2833757602793625 | F | F | F |
| 0.9619068494894876 | 0.5095232876276299 | 0.3780221833113870 | F | F | F |
| 0.5048094079277874 | 0.8737976480180549 | 0.3962431124157817 | F | F | F |
| 0.1952649781981322 | 0.7011837554504723 | 0.4908895354477991 | F | F | F |
| 0.7415372075469049 | 0.5646294654155790 | 0.5101202495644676 | T | T | T |
| 0.4121628623943770 | 0.8969930862490161 | 0.5988508970346734 | T | T | T |
| 0.9632966302007805 | 0.7592491854333704 | 0.6308231755242097 | T | T | T |
| 0.5944235915244526 | 0.6014645383520805 | 0.7059680284256874 | T | T | T |

**Figure 1(f): La<sub>2</sub>O<sub>3</sub>(111), p(1×1)**

O La

|                     |                    |                     |
|---------------------|--------------------|---------------------|
| 1.0000000000000000  |                    |                     |
| 6.8234000000000004  | 0.0000000000000000 | 0.0000000000000000  |
| -3.4117236276940459 | 6.4899793757942073 | 0.0000000000000000  |
| 0.0000000000000016  | 0.0000000000000026 | 25.7149999999999999 |

La O

12 18

Selective dynamics

Direct

|                    |                    |                    |   |   |   |
|--------------------|--------------------|--------------------|---|---|---|
| 0.9219846346797027 | 0.2553166819266224 | 0.0439432237993387 | F | F | F |
| 0.4681585665774435 | 0.3474587312881923 | 0.1169356406766511 | F | F | F |
| 0.0141859439715617 | 0.4396007806497622 | 0.1898891697452854 | F | F | F |
| 0.5495114567158340 | 0.5272806903374965 | 0.2654242942143138 | T | T | T |
| 0.0667706451959089 | 0.5613761907268492 | 0.3561788390254257 | T | T | T |

|                    |                    |                    |   |   |   |
|--------------------|--------------------|--------------------|---|---|---|
| 0.6547722425131486 | 0.7868463960819829 | 0.3987796245260316 | T | T | T |
| 0.4800332923790691 | 0.7044706516406336 | 0.0078164495430713 | F | F | F |
| 0.0260606697731873 | 0.7966127010022035 | 0.0808088664203765 | F | F | F |
| 0.5721759798694777 | 0.8887547503637734 | 0.1538012832976889 | F | F | F |
| 0.1081579732430205 | 0.9742499266649941 | 0.2236875193714255 | T | T | T |
| 0.6513882635254015 | 0.0669398218433470 | 0.2942684292915018 | T | T | T |
| 0.2021933237959167 | 0.1080713403334657 | 0.3707919674826757 | T | T | T |
| 0.7009704423389636 | 0.4798166249363334 | 0.0258603927668659 | F | F | F |
| 0.2469978197330818 | 0.5719586742979033 | 0.0988528096441783 | F | F | F |
| 0.7931131298293721 | 0.6641007236594731 | 0.1718452265214836 | F | F | F |
| 0.3715498932347884 | 0.7586456595586883 | 0.2385464034598553 | T | T | T |
| 0.8198093670207072 | 0.8350917199858329 | 0.3122942078433298 | T | T | T |
| 0.3946593862267554 | 0.8891549129236551 | 0.3663754356333918 | T | T | T |
| 0.1953125813377383 | 0.8018515466180745 | 0.0000000000000000 | F | F | F |
| 0.7413508490531768 | 0.8938395122850622 | 0.0729924168773124 | F | F | F |
| 0.2873782264472950 | 0.9859815616466321 | 0.1459848337546177 | F | F | F |
| 0.8421611165800051 | 0.0899619994067352 | 0.2156312136915643 | T | T | T |
| 0.3569149194094840 | 0.1660739910540391 | 0.2903499028048342 | T | T | T |
| 0.9046964424376301 | 0.1900639543542088 | 0.3746643002062875 | T | T | T |
| 0.2067639675224910 | 0.1579357869491815 | 0.0517596733424099 | F | F | F |
| 0.7527327231151588 | 0.2500778363107514 | 0.1247520902197152 | F | F | F |
| 0.2989066550128996 | 0.3422198856723213 | 0.1977445070970276 | F | F | F |
| 0.8543449252558765 | 0.4394500835916654 | 0.2771542189410545 | T | T | T |
| 0.3884604156902667 | 0.4841144985105553 | 0.3639997928622698 | T | T | T |
| 0.9629998411377750 | 0.7576101334463674 | 0.4121292247893837 | T | T | T |

**Table S3.** Optimized Fractional Coordinates for the Stationary States Shown in Figure 2.

**Figure 2. CO<sub>2</sub> Physisorption**

| C O La              |                    |                     |   |   |   |
|---------------------|--------------------|---------------------|---|---|---|
| C                   | O                  | La                  |   |   |   |
| 1.0000000000000000  |                    |                     |   |   |   |
| 7.8789800000000003  | 0.0000000000000000 | 0.0000000000000000  |   |   |   |
| -3.9394900000000002 | 6.8233968359095165 | 0.0000000000000000  |   |   |   |
| 0.0000000000000000  | 0.0000000000000000 | 25.5688315207999963 |   |   |   |
| C                   | O                  | La                  |   |   |   |
| 1                   | 26                 | 16                  |   |   |   |
| Selective dynamics  |                    |                     |   |   |   |
| Direct              |                    |                     |   |   |   |
| 0.4183898508924397  | 0.6171047220299419 | 0.8060881038822226  | T | T | T |
| 0.2692491624839419  | 0.4697126484326265 | 0.8114986064033306  | T | T | T |
| 0.5709661589126072  | 0.7629879353044605 | 0.8032322712896367  | T | T | T |
| 0.0000000000000000  | 0.0000000000000000 | 0.3790943669879780  | F | F | F |
| 0.1666325478852855  | 0.3332650957705710 | 0.2933258797492897  | F | F | F |
| 0.3333486385380624  | 0.1666325478852855 | 0.4648237441093741  | F | F | F |
| 0.0012347386105390  | 0.0004290552847564 | 0.6207714485068391  | T | T | T |
| 0.1663197292295357  | 0.3332646653495613 | 0.5349917275465933  | T | T | T |
| 0.3336349898556858  | 0.1672878464747538 | 0.7047847595393232  | T | T | T |
| 0.9999897345183015  | 0.5000441982274353 | 0.3790943669879780  | F | F | F |
| 0.1666222824035870  | 0.8333092939980062 | 0.2933258797492897  | F | F | F |
| 0.3333383730563639  | 0.6666767461127208 | 0.4648237441093741  | F | F | F |
| 0.0012883599029697  | 0.5022262929962376 | 0.6196778708245896  | T | T | T |
| 0.1666194913006173  | 0.8336135324936003 | 0.5349350351444783  | T | T | T |
| 0.3329329487711525  | 0.6669369466047770 | 0.7045406064787604  | T | T | T |
| 0.4999378092088094  | 0.0000000000000000 | 0.3790943669879780  | F | F | F |
| 0.6666972770761177  | 0.3332650957705710 | 0.2933258797492897  | F | F | F |
| 0.8332864477468647  | 0.1666325478852855 | 0.4648237441093741  | F | F | F |
| 0.4982922299463516  | 0.0006762373176283 | 0.6202473434572346  | T | T | T |
| 0.6670383212401380  | 0.3334712262920008 | 0.5349735097116001  | T | T | T |
| 0.8333569205873805  | 0.1682527805458320 | 0.7033806835670561  | T | T | T |
| 0.5000544637091338  | 0.5000441982274353 | 0.3790943669879780  | F | F | F |
| 0.6666870115944192  | 0.8333092939980062 | 0.2933258797492897  | F | F | F |
| 0.8332761822651662  | 0.6666767461127208 | 0.4648237441093741  | F | F | F |
| 0.4995515221975785  | 0.4983434936937939 | 0.6201925299762698  | T | T | T |
| 0.6669392769634865  | 0.8338628441532246 | 0.5351945265370108  | T | T | T |
| 0.8334872970696401  | 0.6668076581055311 | 0.7041321308216978  | T | T | T |
| 0.1666325478852855  | 0.3332650957705710 | 0.4388937363395371  | F | F | F |
| 0.3333486385380624  | 0.1666325478852855 | 0.3192558875191267  | F | F | F |
| 0.1660773432425797  | 0.3324745156779603 | 0.6806832568883618  | T | T | T |
| 0.3336082186032275  | 0.1671048223089586 | 0.5609212048262194  | T | T | T |
| 0.1666222824035870  | 0.8333092939980062 | 0.4388937363395371  | F | F | F |
| 0.3333383730563639  | 0.6666767461127208 | 0.3192558875191267  | F | F | F |
| 0.1665103830134251  | 0.8347015853096769 | 0.6798516379189186  | T | T | T |
| 0.3330605314905632  | 0.6666859861044132 | 0.5611427167878971  | T | T | T |
| 0.6666972770761177  | 0.3332650957705710 | 0.4388937363395371  | F | F | F |
| 0.8332864477468647  | 0.1666325478852855 | 0.3192558875191267  | F | F | F |
| 0.6656986347238650  | 0.3340195351694003 | 0.6798832169241239  | T | T | T |
| 0.8334797923869292  | 0.1670957474504814 | 0.5610539851239118  | T | T | T |
| 0.6666870115944192  | 0.8333092939980062 | 0.4388937363395371  | F | F | F |
| 0.8332761822651662  | 0.6666767461127208 | 0.3192558875191267  | F | F | F |
| 0.6685895990804059  | 0.8355541316314693 | 0.6813137651190988  | T | T | T |
| 0.8334292559111011  | 0.6667511136923816 | 0.5610141201958914  | T | T | T |

**Figure 2. CO<sub>2</sub> Transitional State**

C O La

|                     |                    |                     |
|---------------------|--------------------|---------------------|
| 1.0000000000000000  |                    |                     |
| 7.8789800000000003  | 0.0000000000000000 | 0.0000000000000000  |
| -3.9394900000000002 | 6.8233968359095165 | 0.0000000000000000  |
| 0.0000000000000000  | 0.0000000000000000 | 25.5688315207999963 |

C O La  
1 26 16

Selective dynamics

Direct

|                    |                    |                    |   |   |   |
|--------------------|--------------------|--------------------|---|---|---|
| 0.4016404851692776 | 0.6131805696442343 | 0.7846950797307570 | T | T | T |
| 0.2601137530623114 | 0.4588724673922685 | 0.7939029467202887 | T | T | T |
| 0.5598124690683943 | 0.7543691811877214 | 0.7906072440637915 | T | T | T |
| 0.0000000000000000 | 0.0000000000000000 | 0.3790859498024091 | F | F | F |
| 0.1666477117881300 | 0.3332954235762315 | 0.2933258797492897 | F | F | F |
| 0.3333418362248537 | 0.1666477117881300 | 0.4648242920125725 | F | F | F |
| 0.0009304364964970 | 1.0008424837598864 | 0.6208061842890715 | T | T | T |
| 0.1657704691595555 | 0.3317328014076578 | 0.5347870821065253 | T | T | T |
| 0.3346294900336286 | 0.1660947119744351 | 0.7033945394867066 | T | T | T |
| 0.9999942969546183 | 0.5000245545708069 | 0.3790859498024091 | F | F | F |
| 0.1666420087427483 | 0.8333199781470384 | 0.2933258797492897 | F | F | F |
| 0.3333361331794720 | 0.6666722663589084 | 0.4648242920125725 | F | F | F |
| 0.0092276343901553 | 0.5058530576155964 | 0.6201061900238724 | T | T | T |
| 0.1658526644114965 | 0.8341624130939725 | 0.5349053820162033 | T | T | T |
| 0.3329785519778669 | 0.6680310568403893 | 0.7075629272684540 | T | T | T |
| 0.4999654495604560 | 0.0000000000000000 | 0.3790859498024091 | F | F | F |
| 0.6666836724497003 | 0.3332954235762315 | 0.2933258797492897 | F | F | F |
| 0.8333072857853026 | 0.1666477117881300 | 0.4648242920125725 | F | F | F |
| 0.4943893597569460 | 0.9923510029039053 | 0.6204032946073692 | T | T | T |
| 0.6670456416222815 | 0.3333961511797386 | 0.5361077859104439 | T | T | T |
| 0.8325963388575106 | 0.1689437397413927 | 0.7021210273804612 | T | T | T |
| 0.5000302576161886 | 0.5000245545708069 | 0.3790859498024091 | F | F | F |
| 0.6666779694043186 | 0.8333199781470384 | 0.2933258797492897 | F | F | F |
| 0.8333015827398924 | 0.6666722663589084 | 0.4648242920125725 | F | F | F |
| 0.4964533863674832 | 0.5016180370038370 | 0.6208256236239172 | T | T | T |
| 0.6685222893013824 | 0.8343523930787978 | 0.5350167300551903 | T | T | T |
| 0.8345761630831875 | 0.6657458444427938 | 0.7027016464597118 | T | T | T |
| 0.1666477117881300 | 0.3332954235762315 | 0.4388988662554425 | F | F | F |
| 0.3333418362248537 | 0.1666477117881300 | 0.3192513055064197 | F | F | F |
| 0.1652206488718372 | 0.3306228195868950 | 0.6818750803515280 | T | T | T |
| 0.3323376289796945 | 0.1665247664954388 | 0.5609775239772896 | T | T | T |
| 0.1666420087427483 | 0.8333199781470384 | 0.4388988662554425 | F | F | F |
| 0.3333361331794720 | 0.6666722663589084 | 0.3192513055064197 | F | F | F |
| 0.1669516721925702 | 0.8341789509969157 | 0.6792521132539890 | T | T | T |
| 0.3333496935003128 | 0.6663729340166865 | 0.5613745614525854 | T | T | T |
| 0.6666836724497003 | 0.3332954235762315 | 0.4388988662554425 | F | F | F |
| 0.8333072857853026 | 0.1666477117881300 | 0.3192513055064197 | F | F | F |
| 0.6656329322595437 | 0.3343027594045217 | 0.6795974186967971 | T | T | T |
| 0.8343730383954294 | 0.1663499032351302 | 0.5611747417348106 | T | T | T |
| 0.6666779694043186 | 0.8333199781470384 | 0.4388988662554425 | F | F | F |
| 0.8333015827398924 | 0.6666722663589084 | 0.3192513055064197 | F | F | F |
| 0.6709453103992092 | 0.8366268262235913 | 0.6817569509499097 | T | T | T |
| 0.8339151636523834 | 0.6677732035751714 | 0.5609952258291631 | T | T | T |



**Figure 2. CO<sub>2</sub> Chemisorption**

C O La

|                     |                    |                     |
|---------------------|--------------------|---------------------|
| 1.0000000000000000  |                    |                     |
| 7.8789800000000003  | 0.0000000000000000 | 0.0000000000000000  |
| -3.9394900000000002 | 6.8233968359095165 | 0.0000000000000000  |
| 0.0000000000000000  | 0.0000000000000000 | 25.5688315207999963 |

C O La  
1 26 16

Selective dynamics

Direct

|                     |                     |                    |   |   |   |
|---------------------|---------------------|--------------------|---|---|---|
| 0.3817703389725289  | 0.6179274454716692  | 0.7599331824591262 | T | T | T |
| 0.2615904817771322  | 0.4466158907397483  | 0.7754572675170558 | T | T | T |
| 0.5531835160914439  | 0.7377863958046065  | 0.7754610148248430 | T | T | T |
| 0.0000000000000000  | 0.0000000000000000  | 0.3790754283204265 | F | F | F |
| 0.16666666666666714 | 0.3333333333333286  | 0.2933258797492897 | F | F | F |
| 0.3333333333333286  | 0.1666666666666714  | 0.4648249768915562 | F | F | F |
| 0.0010605013208931  | -0.0010599888800452 | 0.6223855835721316 | T | T | T |
| 0.1645603169135743  | 0.3281701125587458  | 0.5348077282572367 | T | T | T |
| 0.3348585740732137  | 0.1610481882640599  | 0.7000675054803038 | T | T | T |
| 0.0000000000000000  | 0.5000000000000000  | 0.3790754283204265 | F | F | F |
| 0.16666666666666714 | 0.8333333333333357  | 0.2933258797492897 | F | F | F |
| 0.3333333333333357  | 0.6666666666666714  | 0.4648249768915562 | F | F | F |
| 0.0195869871371356  | 0.5114347826323565  | 0.6194639987640757 | T | T | T |
| 0.1643811720106272  | 0.8355673203736997  | 0.5349979309413462 | T | T | T |
| 0.3252676596568784  | 0.6746947950755771  | 0.7140058453831042 | T | T | T |
| 0.5000000000000000  | 0.0000000000000000  | 0.3790754283204265 | F | F | F |
| 0.66666666666666714 | 0.3333333333333286  | 0.2933258797492897 | F | F | F |
| 0.8333333333333286  | 0.1666666666666714  | 0.4648249768915562 | F | F | F |
| 0.4883492428793202  | -0.0195012482372766 | 0.6194566736509537 | T | T | T |
| 0.6667939521314541  | 0.3332252994618017  | 0.5371595329351515 | T | T | T |
| 0.8302032025739549  | 0.1695818604859461  | 0.6990461439818139 | T | T | T |
| 0.5000000000000000  | 0.5000000000000000  | 0.3790754283204265 | F | F | F |
| 0.66666666666666714 | 0.8333333333333357  | 0.2933258797492897 | F | F | F |
| 0.8333333333333286  | 0.6666666666666714  | 0.4648249768915562 | F | F | F |
| 0.4923069177435687  | 0.5078004321733930  | 0.6226310385110583 | T | T | T |
| 0.6718220683733118  | 0.8354543931607005  | 0.5348135202688590 | T | T | T |
| 0.8389972436903470  | 0.6650630857636329  | 0.7000484062603427 | T | T | T |
| 0.16666666666666714 | 0.3333333333333286  | 0.4389052786503242 | F | F | F |
| 0.3333333333333286  | 0.1666666666666714  | 0.3192455779905217 | F | F | F |
| 0.1604590423267856  | 0.3210521487364595  | 0.6828576227348186 | T | T | T |
| 0.3322807865710343  | 0.1661800988172893  | 0.5606671363912827 | T | T | T |
| 0.16666666666666714 | 0.8333333333333357  | 0.4389052786503242 | F | F | F |
| 0.3333333333333357  | 0.6666666666666714  | 0.3192455779905217 | F | F | F |
| 0.1627492515173143  | 0.8373145140874750  | 0.6754130678178595 | T | T | T |
| 0.3340559362831686  | 0.6659182879043494  | 0.5617576932027234 | T | T | T |
| 0.66666666666666714 | 0.3333333333333286  | 0.4389052786503242 | F | F | F |
| 0.8333333333333286  | 0.1666666666666714  | 0.3192455779905217 | F | F | F |
| 0.6643617608967791  | 0.3355220884373572  | 0.6808567427748580 | T | T | T |
| 0.8343382214186923  | 0.1656972289853111  | 0.5615156151628976 | T | T | T |
| 0.66666666666666714 | 0.8333333333333357  | 0.4389052786503242 | F | F | F |
| 0.8333333333333286  | 0.6666666666666714  | 0.3192455779905217 | F | F | F |
| 0.6788815450663718  | 0.8393152617673559  | 0.6828793432363629 | T | T | T |
| 0.8337748312884740  | 0.6677242016626006  | 0.5606706013608771 | T | T | T |

**Table S4.** Optimized Fractional Coordinates for the CO<sub>2</sub> Chemisorption Structures Shown in Figure 3.

**Figure 3. (001)**

| C O La              |                     |                     |   |   |   |
|---------------------|---------------------|---------------------|---|---|---|
| C                   | O                   | La                  |   |   |   |
| 1.0000000000000000  |                     |                     |   |   |   |
| 7.8789800000000003  | 0.0000000000000000  | 0.0000000000000000  |   |   |   |
| -3.9394900000000002 | 6.8233968359095165  | 0.0000000000000000  |   |   |   |
| 0.0000000000000000  | 0.0000000000000000  | 25.5688315207999963 |   |   |   |
| C O La              |                     |                     |   |   |   |
| 1                   | 26                  | 16                  |   |   |   |
| Selective dynamics  |                     |                     |   |   |   |
| Direct              |                     |                     |   |   |   |
| 0.3817703389725289  | 0.6179274454716692  | 0.7599331824591262  | T | T | T |
| 0.2615904817771322  | 0.4466158907397483  | 0.7754572675170558  | T | T | T |
| 0.5531835160914439  | 0.7377863958046065  | 0.7754610148248430  | T | T | T |
| 0.0000000000000000  | 0.0000000000000000  | 0.3790754283204265  | F | F | F |
| 0.16666666666666714 | 0.3333333333333286  | 0.2933258797492897  | F | F | F |
| 0.3333333333333286  | 0.16666666666666714 | 0.4648249768915562  | F | F | F |
| 0.0010605013208931  | -0.0010599888800452 | 0.6223855835721316  | T | T | T |
| 0.1645603169135743  | 0.3281701125587458  | 0.5348077282572367  | T | T | T |
| 0.3348585740732137  | 0.1610481882640599  | 0.7000675054803038  | T | T | T |
| 0.0000000000000000  | 0.5000000000000000  | 0.3790754283204265  | F | F | F |
| 0.16666666666666714 | 0.8333333333333357  | 0.2933258797492897  | F | F | F |
| 0.3333333333333357  | 0.66666666666666714 | 0.4648249768915562  | F | F | F |
| 0.0195869871371356  | 0.5114347826323565  | 0.6194639987640757  | T | T | T |
| 0.1643811720106272  | 0.8355673203736997  | 0.5349979309413462  | T | T | T |
| 0.3252676596568784  | 0.6746947950755771  | 0.7140058453831042  | T | T | T |
| 0.5000000000000000  | 0.0000000000000000  | 0.3790754283204265  | F | F | F |
| 0.66666666666666714 | 0.3333333333333286  | 0.2933258797492897  | F | F | F |
| 0.8333333333333286  | 0.16666666666666714 | 0.4648249768915562  | F | F | F |
| 0.4883492428793202  | -0.0195012482372766 | 0.6194566736509537  | T | T | T |
| 0.6667939521314541  | 0.3332252994618017  | 0.5371595329351515  | T | T | T |
| 0.8302032025739549  | 0.1695818604859461  | 0.6990461439818139  | T | T | T |
| 0.5000000000000000  | 0.5000000000000000  | 0.3790754283204265  | F | F | F |
| 0.66666666666666714 | 0.8333333333333357  | 0.2933258797492897  | F | F | F |
| 0.8333333333333286  | 0.66666666666666714 | 0.4648249768915562  | F | F | F |
| 0.4923069177435687  | 0.5078004321733930  | 0.6226310385110583  | T | T | T |
| 0.6718220683733118  | 0.8354543931607005  | 0.5348135202688590  | T | T | T |
| 0.8389972436903470  | 0.6650630857636329  | 0.7000484062603427  | T | T | T |
| 0.16666666666666714 | 0.3333333333333286  | 0.4389052786503242  | F | F | F |
| 0.3333333333333286  | 0.16666666666666714 | 0.3192455779905217  | F | F | F |
| 0.1604590423267856  | 0.3210521487364595  | 0.6828576227348186  | T | T | T |
| 0.3322807865710343  | 0.1661800988172893  | 0.5606671363912827  | T | T | T |
| 0.16666666666666714 | 0.8333333333333357  | 0.4389052786503242  | F | F | F |
| 0.3333333333333357  | 0.66666666666666714 | 0.3192455779905217  | F | F | F |
| 0.1627492515173143  | 0.8373145140874750  | 0.6754130678178595  | T | T | T |
| 0.3340559362831686  | 0.6659182879043494  | 0.5617576932027234  | T | T | T |
| 0.66666666666666714 | 0.3333333333333286  | 0.4389052786503242  | F | F | F |
| 0.8333333333333286  | 0.16666666666666714 | 0.3192455779905217  | F | F | F |
| 0.6643617608967791  | 0.3355220884373572  | 0.6808567427748580  | T | T | T |
| 0.8343382214186923  | 0.1656972289853111  | 0.5615156151628976  | T | T | T |
| 0.66666666666666714 | 0.8333333333333357  | 0.4389052786503242  | F | F | F |
| 0.8333333333333286  | 0.66666666666666714 | 0.3192455779905217  | F | F | F |
| 0.6788815450663718  | 0.8393152617673559  | 0.6828793432363629  | T | T | T |

0.8337748312884740 0.6677242016626006 0.5606706013608771 T T T

**Figure 3. (011)-I**

C O La

1.0000000000000000  
 7.8789800000000003 0.0000000000000000 0.0000000000000000  
 -1.9697450000000001 7.0625114891995047 0.0000000000000000  
 0.0000000000000000 0.0000000000000000 25.8263268595284643

C O La  
 1 26 16

Selective dynamics

Direct

|                     |                    |                    |   |   |   |
|---------------------|--------------------|--------------------|---|---|---|
| 0.3226751769868818  | 0.2903890020256840 | 0.7180881079042000 | T | T | T |
| 0.4640904496206570  | 0.2748154498025357 | 0.7398311349407958 | T | T | T |
| 0.1747657618190402  | 0.2845770810271387 | 0.7396097471472276 | T | T | T |
| 0.4041697660885788  | 0.6166790643543223 | 0.3265015826258235 | F | F | F |
| 0.0110175396903500  | 0.0440701587614001 | 0.3626018224361118 | F | F | F |
| 0.2973219924868076  | 0.1892879699472374 | 0.2904013428155352 | F | F | F |
| 0.2125092982657435  | 0.8500371930629598 | 0.4421671942086078 | F | F | F |
| 0.3193570718675147  | 0.2774282874700376 | 0.4782674340188962 | F | F | F |
| 0.1056615246639652  | 0.4226460986558749 | 0.4060669543983195 | F | F | F |
| 0.0238835536635721  | 0.0914321688636062 | 0.5611702570851266 | T | T | T |
| 0.1339435283694820  | 0.5244369653073393 | 0.5973203481032294 | T | T | T |
| 0.4118219579996321  | 0.6579156363493847 | 0.5215539001056231 | T | T | T |
| 0.3292381292104271  | 0.3124957808058018 | 0.6659724749086172 | T | T | T |
| 0.4405106927374448  | 0.7378854401626573 | 0.7040242803628235 | T | T | T |
| 0.2229814318534344  | 0.9051705935564988 | 0.6398414825815336 | T | T | T |
| 0.9041697660885788  | 0.6166790643543223 | 0.3265015826258235 | F | F | F |
| 0.5110175396903500  | 0.0440701587614001 | 0.3626018224361118 | F | F | F |
| 0.7973219924868076  | 0.1892879699472374 | 0.2904013428155352 | F | F | F |
| 0.7125092982657435  | 0.8500371930629598 | 0.4421671942086078 | F | F | F |
| 0.8193570718675147  | 0.2774282874700376 | 0.4782674340188962 | F | F | F |
| 0.6056615246639723  | 0.4226460986558749 | 0.4060669543983195 | F | F | F |
| 0.5197716236486883  | 0.0782004350446295 | 0.5613294572064561 | T | T | T |
| 0.6249134352547699  | 0.5149199436363753 | 0.5942913506798665 | T | T | T |
| 0.9175302162475955  | 0.6629377096212316 | 0.5221136890306890 | T | T | T |
| 0.8162955947168308  | 0.2911143869916835 | 0.6625693989014220 | T | T | T |
| 0.9349940410880515  | 0.7524319256005279 | 0.7081516549289392 | T | T | T |
| 0.7257049494902822  | 0.8823116376400643 | 0.6364764545288631 | T | T | T |
| 0.0873093305305090  | 0.3492373221220291 | 0.3165603160863029 | F | F | F |
| 0.2210302016466557  | 0.8841208065866084 | 0.3364428491653442 | F | F | F |
| 0.3956488627076666  | 0.5825954508306666 | 0.4322259276690872 | F | F | F |
| 0.0293697338238132  | 0.1174789352952530 | 0.4521084607481285 | F | F | F |
| 0.2056469330120352  | 0.8227656738879979 | 0.5504507947004816 | T | T | T |
| 0.3364178697756174  | 0.3572120189831476 | 0.5665767119561365 | T | T | T |
| -0.0011748790817136 | 0.0481253998383193 | 0.6651640782210970 | T | T | T |
| 0.1463777511045211  | 0.6037464979773338 | 0.6865206326368575 | T | T | T |
| 0.5873093305305019  | 0.3492373221220291 | 0.3165603160863029 | F | F | F |
| 0.7210302016466557  | 0.8841208065866084 | 0.3364428491653442 | F | F | F |
| 0.8956488627076666  | 0.5825954508306666 | 0.4322259276690872 | F | F | F |
| 0.5293697338238132  | 0.1174789352952530 | 0.4521084607481285 | F | F | F |
| 0.7032197310151191  | 0.8159433172293384 | 0.5475984222906625 | T | T | T |
| 0.8402909327842544  | 0.3549218286203165 | 0.5694890385145642 | T | T | T |
| 0.5223297347152286  | 0.0378002380798411 | 0.6640096159235551 | T | T | T |
| 0.6573040230401477  | 0.5845729671145145 | 0.6846477851049281 | T | T | T |

**Figure 3. (011)-II**

C O La

|                     |                    |                     |
|---------------------|--------------------|---------------------|
| 1.0000000000000000  |                    |                     |
| 7.8789800000000003  | 0.0000000000000000 | 0.0000000000000000  |
| -1.9697450000000001 | 7.0625114891995047 | 0.0000000000000000  |
| 0.0000000000000000  | 0.0000000000000000 | 25.8263268595284643 |

C O La  
1 26 16

Selective dynamics

Direct

|                    |                    |                    |   |   |   |
|--------------------|--------------------|--------------------|---|---|---|
| 0.4029888504919800 | 0.6152604688030877 | 0.7590318870729269 | T | T | T |
| 0.5336661004620662 | 0.5563775160988584 | 0.7731924089275540 | T | T | T |
| 0.2429590097298212 | 0.5502203576509873 | 0.7727373944949834 | T | T | T |
| 0.4041697660885788 | 0.6166790643543223 | 0.3265015826258235 | F | F | F |
| 0.0110175396903500 | 0.0440701587614001 | 0.3626018224361118 | F | F | F |
| 0.2973219924868076 | 0.1892879699472374 | 0.2904013428155352 | F | F | F |
| 0.2125092982657435 | 0.8500371930629598 | 0.4421671942086078 | F | F | F |
| 0.3193570718675147 | 0.2774282874700376 | 0.4782674340188962 | F | F | F |
| 0.1056615246639652 | 0.4226460986558749 | 0.4060669543983195 | F | F | F |
| 0.0222618613117094 | 0.0748295542441098 | 0.5653388385987771 | T | T | T |
| 0.1272394263269802 | 0.5160956128421873 | 0.5932733415097425 | T | T | T |
| 0.4175167604005103 | 0.6677408223690335 | 0.5213334440578803 | T | T | T |
| 0.3233887927885615 | 0.2826256607291601 | 0.6618695572729940 | T | T | T |
| 0.4347879323544974 | 0.7489275230636686 | 0.7197668266148231 | T | T | T |
| 0.2318768904134485 | 0.8780648575188382 | 0.6391842901348990 | T | T | T |
| 0.9041697660885788 | 0.6166790643543223 | 0.3265015826258235 | F | F | F |
| 0.5110175396903500 | 0.0440701587614001 | 0.3626018224361118 | F | F | F |
| 0.7973219924868076 | 0.1892879699472374 | 0.2904013428155352 | F | F | F |
| 0.7125092982657435 | 0.8500371930629598 | 0.4421671942086078 | F | F | F |
| 0.8193570718675147 | 0.2774282874700376 | 0.4782674340188962 | F | F | F |
| 0.6056615246639723 | 0.4226460986558749 | 0.4060669543983195 | F | F | F |
| 0.5224519661967268 | 0.0922454524957360 | 0.5655432760105922 | T | T | T |
| 0.6314092573753227 | 0.5270356227382066 | 0.5941317511165345 | T | T | T |
| 0.9145207411365548 | 0.6635332059433943 | 0.5216141055240979 | T | T | T |
| 0.8260376627629463 | 0.3318740678319191 | 0.6665425511461367 | T | T | T |
| 0.9432091588069454 | 0.7612431384441397 | 0.7040808163765302 | T | T | T |
| 0.7155431348055703 | 0.8958364847192117 | 0.6400259260539137 | T | T | T |
| 0.0873093305305090 | 0.3492373221220291 | 0.3165603160863029 | F | F | F |
| 0.2210302016466557 | 0.8841208065866084 | 0.3364428491653442 | F | F | F |
| 0.3956488627076666 | 0.5825954508306666 | 0.4322259276690872 | F | F | F |
| 0.0293697338238132 | 0.1174789352952530 | 0.4521084607481285 | F | F | F |
| 0.2040854064175425 | 0.8173109622836665 | 0.5489663593021822 | T | T | T |
| 0.3417811668591196 | 0.3608453329801706 | 0.5691095068660120 | T | T | T |
| 0.0209483694132366 | 0.0492108319574967 | 0.6605109637005583 | T | T | T |
| 0.1259397398694916 | 0.5814227001396177 | 0.6851178538920829 | T | T | T |
| 0.5873093305305019 | 0.3492373221220291 | 0.3165603160863029 | F | F | F |
| 0.7210302016466557 | 0.8841208065866084 | 0.3364428491653442 | F | F | F |
| 0.8956488627076666 | 0.5825954508306666 | 0.4322259276690872 | F | F | F |
| 0.5293697338238132 | 0.1174789352952530 | 0.4521084607481285 | F | F | F |
| 0.7053349438540357 | 0.822739267266357  | 0.5498104260156323 | T | T | T |
| 0.8367666133763474 | 0.3612715439197159 | 0.5690598611006304 | T | T | T |
| 0.5097255195477255 | 0.0614303532769322 | 0.6617252464588255 | T | T | T |
| 0.6673011781595717 | 0.5924484934824540 | 0.6855510370483567 | T | T | T |

**Figure 3. (011)-III**

|                     |                    |                     |   |   |   |
|---------------------|--------------------|---------------------|---|---|---|
| C                   | O                  | La                  |   |   |   |
| 1.0000000000000000  |                    |                     |   |   |   |
| 7.8789800000000003  | 0.0000000000000000 | 0.0000000000000000  |   |   |   |
| -1.9697450000000001 | 7.0625114891995047 | 0.0000000000000000  |   |   |   |
| 0.0000000000000000  | 0.0000000000000000 | 25.8263268595284643 |   |   |   |
| C                   | O                  | La                  |   |   |   |
| 1                   | 26                 | 16                  |   |   |   |
| Selective dynamics  |                    |                     |   |   |   |
| Direct              |                    |                     |   |   |   |
| 0.3705750032534995  | 0.8296630698822141 | 0.7540773909162407  | T | T | T |
| 0.4365330979827777  | 0.0088886067029683 | 0.7583421441492847  | T | T | T |
| 0.2356521547164099  | 0.7254218281988712 | 0.7756836438436400  | T | T | T |
| 0.4041697660885788  | 0.6166790643543223 | 0.3265015826258235  | F | F | F |
| 0.0110175396903500  | 0.0440701587614001 | 0.3626018224361118  | F | F | F |
| 0.2973219924868076  | 0.1892879699472374 | 0.2904013428155352  | F | F | F |
| 0.2125092982657435  | 0.8500371930629598 | 0.4421671942086078  | F | F | F |
| 0.3193570718675147  | 0.2774282874700376 | 0.4782674340188962  | F | F | F |
| 0.1056615246639652  | 0.4226460986558749 | 0.4060669543983195  | F | F | F |
| 0.0251113725156107  | 0.0765070513580789 | 0.5656555580886869  | T | T | T |
| 0.1264157167617013  | 0.5176345750243360 | 0.5939640194172536  | T | T | T |
| 0.4165387243670259  | 0.6637228822566565 | 0.5216763209597489  | T | T | T |
| 0.3182137996136361  | 0.2957482882557331 | 0.6624869648087850  | T | T | T |
| 0.4469090054048151  | 0.7439581931094120 | 0.7161417211599617  | T | T | T |
| 0.2336683678659101  | 0.8783256959012689 | 0.6406122866765648  | T | T | T |
| 0.9041697660885788  | 0.6166790643543223 | 0.3265015826258235  | F | F | F |
| 0.5110175396903500  | 0.0440701587614001 | 0.3626018224361118  | F | F | F |
| 0.7973219924868076  | 0.1892879699472374 | 0.2904013428155352  | F | F | F |
| 0.7125092982657435  | 0.8500371930629598 | 0.4421671942086078  | F | F | F |
| 0.8193570718675147  | 0.2774282874700376 | 0.4782674340188962  | F | F | F |
| 0.6056615246639723  | 0.4226460986558749 | 0.4060669543983195  | F | F | F |
| 0.5224392526139470  | 0.0913793429304675 | 0.5609943161813521  | T | T | T |
| 0.6305697206548461  | 0.5241832139770692 | 0.5945132340263045  | T | T | T |
| 0.9146555053234432  | 0.6636032543744816 | 0.5218086005873497  | T | T | T |
| 0.8254325559756331  | 0.3256403319514342 | 0.6665434046535252  | T | T | T |
| 0.9323340577634688  | 0.7438037334935734 | 0.7011361357053179  | T | T | T |
| 0.7156533174391291  | 0.8938361353448734 | 0.6385645581619882  | T | T | T |
| 0.0873093305305090  | 0.3492373221220291 | 0.3165603160863029  | F | F | F |
| 0.2210302016466557  | 0.8841208065866084 | 0.3364428491653442  | F | F | F |
| 0.3956488627076666  | 0.5825954508306666 | 0.4322259276690872  | F | F | F |
| 0.0293697338238132  | 0.1174789352952530 | 0.4521084607481285  | F | F | F |
| 0.2062129796485120  | 0.8176904518901008 | 0.5495824008441180  | T | T | T |
| 0.3387136303823329  | 0.3564441382663182 | 0.5687871592350456  | T | T | T |
| 0.0203185721727746  | 0.0405176172394689 | 0.6608946974614474  | T | T | T |
| 0.1285271562711792  | 0.5727896321872953 | 0.6849516517782512  | T | T | T |
| 0.5873093305305019  | 0.3492373221220291 | 0.3165603160863029  | F | F | F |
| 0.7210302016466557  | 0.8841208065866084 | 0.3364428491653442  | F | F | F |
| 0.8956488627076666  | 0.5825954508306666 | 0.4322259276690872  | F | F | F |
| 0.5293697338238132  | 0.1174789352952530 | 0.4521084607481285  | F | F | F |
| 0.7040423828591192  | 0.8232573067783062 | 0.5487150340206299  | T | T | T |
| 0.8370845194855818  | 0.3590360120256398 | 0.5686125597721026  | T | T | T |
| 0.5165841189417111  | 0.0664906797633611 | 0.6646995514573064  | T | T | T |
| 0.6569435635630397  | 0.5891668607079807 | 0.6819609846400263  | T | T | T |

**Figure 3. (100)**

|                    |                     |                     |   |   |   |
|--------------------|---------------------|---------------------|---|---|---|
| C O La             |                     |                     |   |   |   |
| 1.0000000000000000 |                     |                     |   |   |   |
| 7.8789800000000003 | 0.0000000000000000  | 0.0000000000000000  |   |   |   |
| 0.0000000000000000 | 6.1837999999999997  | 0.0000000000000000  |   |   |   |
| 0.0000000000000000 | 0.0000000000000000  | 27.5095608658341177 |   |   |   |
| C O La             |                     |                     |   |   |   |
| 1 26 16            |                     |                     |   |   |   |
| Selective dynamics |                     |                     |   |   |   |
| Direct             |                     |                     |   |   |   |
| 0.8804724666706714 | 0.1648053120173406  | 0.7688159900528349  | T | T | T |
| 0.8875746420279716 | -0.0042384838895847 | 0.7959877364866739  | T | T | T |
| 0.8825295488126205 | 0.3630483865986472  | 0.7815414282621903  | T | T | T |
| 0.3750000000000000 | 0.5000000000000000  | 0.3139720349630153  | F | F | F |
| 0.1250000000000000 | 0.1454420000000027  | 0.3553115827490103  | F | F | F |
| 0.1250000000000000 | 0.8545579999999973  | 0.2726324871770203  | F | F | F |
| 0.1250000000000000 | 0.5000000000000000  | 0.4379906783210075  | F | F | F |
| 0.3750000000000000 | 0.1454420000000027  | 0.4793302261070025  | F | F | F |
| 0.3750000000000000 | 0.8545579999999973  | 0.3966511305350124  | F | F | F |
| 0.3751816197209042 | 0.5134093842790404  | 0.5567424969922566  | T | T | T |
| 0.1345850231748127 | 0.1508920781994968  | 0.6064224947137734  | T | T | T |
| 0.1218175433833078 | 0.8590135393525482  | 0.5212665191655294  | T | T | T |
| 0.1239494060512824 | 0.5636396152858620  | 0.6891576355812504  | T | T | T |
| 0.3742437093461120 | 0.0679867346779525  | 0.7281596160460884  | T | T | T |
| 0.3759247594261880 | 0.8398614421815737  | 0.6436031135929177  | T | T | T |
| 0.8750000000000000 | 0.5000000000000000  | 0.3139720349630153  | F | F | F |
| 0.6250000000000000 | 0.1454420000000027  | 0.3553115827490103  | F | F | F |
| 0.6250000000000000 | 0.8545579999999973  | 0.2726324871770203  | F | F | F |
| 0.6250000000000000 | 0.5000000000000000  | 0.4379906783210075  | F | F | F |
| 0.8750000000000000 | 0.1454420000000027  | 0.4793302261070025  | F | F | F |
| 0.8750000000000000 | 0.8545579999999973  | 0.3966511305350124  | F | F | F |
| 0.8753773334304217 | 0.4847971770972375  | 0.5634095852372714  | T | T | T |
| 0.6170472506245172 | 0.1512043639116626  | 0.6064791997720050  | T | T | T |
| 0.6283537999546388 | 0.8590203233364838  | 0.5213904381301269  | T | T | T |
| 0.6282249956228287 | 0.5661448709189925  | 0.6897620871439597  | T | T | T |
| 0.8697323614569782 | 0.1183379505510551  | 0.7209702143475964  | T | T | T |
| 0.8762483353154870 | 0.8495102124125186  | 0.6419682206876028  | T | T | T |
| 0.1250000000000000 | 0.7473850000000013  | 0.3553115827490103  | F | F | F |
| 0.1250000000000000 | 0.2526149999999987  | 0.2726324871770203  | F | F | F |
| 0.3750000000000000 | 0.7473850000000013  | 0.4793302261070025  | F | F | F |
| 0.3750000000000000 | 0.2526149999999987  | 0.3966511305350124  | F | F | F |
| 0.1276834874618652 | 0.7390438835052532  | 0.6027019356821030  | T | T | T |
| 0.1274626385190794 | 0.2522685639729033  | 0.5206468775677898  | T | T | T |
| 0.3757040014417269 | 0.7252363854900722  | 0.7230983749411017  | T | T | T |
| 0.3755070517293734 | 0.2211475745434741  | 0.6553148991528969  | T | T | T |
| 0.6250000000000000 | 0.7473850000000013  | 0.3553115827490103  | F | F | F |
| 0.6250000000000000 | 0.2526149999999987  | 0.2726324871770203  | F | F | F |
| 0.8750000000000000 | 0.7473850000000013  | 0.4793302261070025  | F | F | F |
| 0.8750000000000000 | 0.2526149999999987  | 0.3966511305350124  | F | F | F |
| 0.6243970052246486 | 0.7394870592908281  | 0.6028695012285197  | T | T | T |
| 0.6226357096066744 | 0.2523310444126959  | 0.5207010723992485  | T | T | T |
| 0.8770133110963062 | 0.7065415381019692  | 0.7259817596424232  | T | T | T |
| 0.8758217459013573 | 0.2371562389864346  | 0.6406783669831576  | T | T | T |

**Figure 3. (110)-I**

| C O La             |                    |                    |   |   |   |
|--------------------|--------------------|--------------------|---|---|---|
| 1                  | 20                 | 12                 |   |   |   |
| Selective dynamics |                    |                    |   |   |   |
| Direct             |                    |                    |   |   |   |
| 0.5023653358528936 | 0.5031902944156695 | 0.7454900382226312 | T | T | T |
| 0.6407590048704765 | 0.4015824718102929 | 0.7688847570328489 | T | T | T |
| 0.3654863047107608 | 0.6071354629803363 | 0.7688985004272009 | T | T | T |
| 0.0000000000000000 | 0.5000000000000000 | 0.3018263512514210 | F | F | F |
| 0.3333333333333357 | 0.8545579999999973 | 0.3018263512514210 | F | F | F |
| 0.6666666666666643 | 0.1454420000000027 | 0.3018263512514210 | F | F | F |
| 0.5000000000000000 | 0.5000000000000000 | 0.3810958107508498 | F | F | F |
| 0.8333333333333357 | 0.8545579999999973 | 0.3810958107508498 | F | F | F |
| 0.1666666666666643 | 0.1454420000000027 | 0.3810958107508498 | F | F | F |
| 0.0000000000000000 | 0.5000000000000000 | 0.4603652702502856 | F | F | F |
| 0.3333333333333357 | 0.8545579999999973 | 0.4603652702502856 | F | F | F |
| 0.6666666666666643 | 0.1454420000000027 | 0.4603652702502856 | F | F | F |
| 0.4999933582166168 | 0.5002781985095568 | 0.5374270983377752 | T | T | T |
| 0.8352967932960350 | 0.8544303087355820 | 0.5397885932589125 | T | T | T |
| 0.1649538662872714 | 0.1457311174573387 | 0.5398246985995223 | T | T | T |
| 0.0000037286488979 | 0.4996928013076128 | 0.6230714229220877 | T | T | T |
| 0.3327777789949120 | 0.8528415030347117 | 0.6190890088383270 | T | T | T |
| 0.6669523772643701 | 0.1474644066856178 | 0.6189786643719534 | T | T | T |
| 0.5005876418700735 | 0.5002395702339143 | 0.6902794168708938 | T | T | T |
| 0.8369630371850333 | 0.8630038326855984 | 0.6968571441045056 | T | T | T |
| 0.1632989954607872 | 0.1376951625869730 | 0.6970014010248754 | T | T | T |
| 0.3333333333333357 | 0.2526149999999987 | 0.3018263512514210 | F | F | F |
| 0.6666666666666643 | 0.7473850000000013 | 0.3018263512514210 | F | F | F |
| 0.8333333333333357 | 0.2526149999999987 | 0.3810958107508498 | F | F | F |
| 0.1666666666666643 | 0.7473850000000013 | 0.3810958107508498 | F | F | F |
| 0.3333333333333357 | 0.2526149999999987 | 0.4603652702502856 | F | F | F |
| 0.6666666666666643 | 0.7473850000000013 | 0.4603652702502856 | F | F | F |
| 0.8306251460486898 | 0.2534494673555590 | 0.5387679683574524 | T | T | T |
| 0.1695607680629813 | 0.7467515796338395 | 0.5387889814001868 | T | T | T |
| 0.3260745472648185 | 0.2480664538468835 | 0.6198683659928441 | T | T | T |
| 0.6739167095713380 | 0.7524923384471631 | 0.6197997572157441 | T | T | T |
| 0.8390197546774655 | 0.2345067916442919 | 0.6971494681436919 | T | T | T |
| 0.1612327803405601 | 0.7663115438791375 | 0.6973078003164442 | T | T | T |

**Figure 3. (110)-II**

| C O La             |    |    |  |  |  |
|--------------------|----|----|--|--|--|
| 1                  | 20 | 12 |  |  |  |
| Selective dynamics |    |    |  |  |  |
| Direct             |    |    |  |  |  |

|                    |                    |                    |   |   |   |
|--------------------|--------------------|--------------------|---|---|---|
| 0.8273737586664904 | 0.7888821257119988 | 0.7542864636686155 | T | T | T |
| 0.9058074800302494 | 0.5984135666661935 | 0.7621952349014878 | T | T | T |
| 0.7874402768625552 | 0.9315448816819828 | 0.7885881163948321 | T | T | T |
| 0.0000000000000000 | 0.5000000000000000 | 0.3018263512514210 | F | F | F |
| 0.3333333333333357 | 0.8545579999999973 | 0.3018263512514210 | F | F | F |
| 0.6666666666666643 | 0.1454420000000027 | 0.3018263512514210 | F | F | F |
| 0.5000000000000000 | 0.5000000000000000 | 0.3810958107508498 | F | F | F |
| 0.8333333333333357 | 0.8545579999999973 | 0.3810958107508498 | F | F | F |
| 0.1666666666666643 | 0.1454420000000027 | 0.3810958107508498 | F | F | F |
| 0.0000000000000000 | 0.5000000000000000 | 0.4603652702502856 | F | F | F |
| 0.3333333333333357 | 0.8545579999999973 | 0.4603652702502856 | F | F | F |
| 0.6666666666666643 | 0.1454420000000027 | 0.4603652702502856 | F | F | F |
| 0.5099136914607987 | 0.5026727804089464 | 0.5391470991984079 | T | T | T |
| 0.8349649227255925 | 0.8556129592218285 | 0.5388537536672454 | T | T | T |
| 0.1634816505764038 | 0.1523533366751543 | 0.5391371853571081 | T | T | T |
| 0.0159291920880745 | 0.5223891585863164 | 0.6266004619792690 | T | T | T |
| 0.3382628761952653 | 0.8635160575072832 | 0.6152428527135103 | T | T | T |
| 0.6840945306397250 | 0.1470403380269310 | 0.6242400719827623 | T | T | T |
| 0.4719767217780092 | 0.5191913850681483 | 0.6795980132500125 | T | T | T |
| 0.8060361439993599 | 0.8426176731365240 | 0.7019923447478301 | T | T | T |
| 0.1356529243292014 | 0.1163757833130010 | 0.6943433976634534 | T | T | T |
| 0.3333333333333357 | 0.2526149999999987 | 0.3018263512514210 | F | F | F |
| 0.6666666666666643 | 0.7473850000000013 | 0.3018263512514210 | F | F | F |
| 0.8333333333333357 | 0.2526149999999987 | 0.3810958107508498 | F | F | F |
| 0.1666666666666643 | 0.7473850000000013 | 0.3810958107508498 | F | F | F |
| 0.3333333333333357 | 0.2526149999999987 | 0.4603652702502856 | F | F | F |
| 0.6666666666666643 | 0.7473850000000013 | 0.4603652702502856 | F | F | F |
| 0.8306652683730055 | 0.2465514387441773 | 0.5397981364259877 | T | T | T |
| 0.1665327127535330 | 0.7493595056127142 | 0.5382289366730137 | T | T | T |
| 0.3316800749779622 | 0.2479518030074307 | 0.6219456491009859 | T | T | T |
| 0.6617933045694119 | 0.7353582783043905 | 0.6171958878802195 | T | T | T |
| 0.8336574264566911 | 0.2468991845467971 | 0.7048116325053181 | T | T | T |
| 0.1901003704434156 | 0.7319082910965194 | 0.6926041658690210 | T | T | T |

**Figure 3. (101)-I**

| C O La             |                    |                     |   |   |   |
|--------------------|--------------------|---------------------|---|---|---|
| 1.0000000000000000 |                    |                     |   |   |   |
| 7.3320504567344598 | 0.0000000000000000 | 0.0000000000000000  |   |   |   |
| 2.1166768493587393 | 7.5893349481880668 | 0.0000000000000000  |   |   |   |
| 0.0000000000000000 | 0.0000000000000000 | 26.4666250656236741 |   |   |   |
| C O La             |                    |                     |   |   |   |
| 1                  | 26                 | 16                  |   |   |   |
| Selective dynamics |                    |                     |   |   |   |
| Direct             |                    |                     |   |   |   |
| 0.0069371423432361 | 0.0381970014334295 | 0.7336256982111439  | T | T | T |
| 0.8554288369291660 | 0.0624652188890311 | 0.7601653822038239  | T | T | T |
| 0.1698365942290350 | 0.0463392085833687 | 0.7508693443988923  | T | T | T |
| 0.6166790643543223 | 0.0958302339114212 | 0.3306989717953783  | F | F | F |
| 0.9662841158585209 | 0.2584289710353715 | 0.3283033998687301  | F | F | F |
| 0.2670740128501166 | 0.4332314967874709 | 0.3330945437220194  | F | F | F |
| 0.8500371930629598 | 0.2874907017342565 | 0.4435663239317904  | F | F | F |
| 0.1996422445671584 | 0.4500894388582140 | 0.4411707520051493  | F | F | F |
| 0.5004321415587540 | 0.1248919646103062 | 0.4459618958584386  | F | F | F |
| 0.0864921130228210 | 0.4839256557096531 | 0.5636857793145453  | T | T | T |
| 0.4403476494308582 | 0.1399833219135033 | 0.5487892096724151  | T | T | T |



|                    |                    |                    |   |   |   |
|--------------------|--------------------|--------------------|---|---|---|
| 0.7411560939682478 | 0.3160805997457618 | 0.5618579576979789 | T | T | T |
| 0.2973111746003185 | 0.1866908308856569 | 0.6506237824538936 | T | T | T |
| 0.6155882354681707 | 0.3246990310050588 | 0.6778162173875431 | T | T | T |
| 0.9940886664942855 | 0.0047046881345331 | 0.6837245477422298 | T | T | T |
| 0.6166790643543223 | 0.5958302339114212 | 0.3306989717953783 | F | F | F |
| 0.9662841158585209 | 0.7584289710353715 | 0.3283033998687301 | F | F | F |
| 0.2670740128501166 | 0.9332314967874709 | 0.3330945437220194 | F | F | F |
| 0.8500371930629598 | 0.7874907017342565 | 0.4435663239317904 | F | F | F |
| 0.1996422445671584 | 0.9500894388582140 | 0.4411707520051493 | F | F | F |
| 0.5004321415587540 | 0.6248919646103133 | 0.4459618958584386 | F | F | F |
| 0.0885518676898096 | 0.9776532524514203 | 0.5602338425332118 | T | T | T |
| 0.4399026841700072 | 0.6439686008085964 | 0.5490864343710914 | T | T | T |
| 0.7411272622795768 | 0.8175940004648176 | 0.5638266391039113 | T | T | T |
| 0.3363171408249239 | 0.6626157488324791 | 0.6546929589155276 | T | T | T |
| 0.6174558289472546 | 0.8699081626303465 | 0.6763109769358401 | T | T | T |
| 0.8807057563749864 | 0.5340749019409128 | 0.6707050290608839 | T | T | T |
| 0.2714512792191499 | 0.1821371801952125 | 0.2833757602793625 | F | F | F |
| 0.9619068494894876 | 0.0095232876276299 | 0.3780221833113870 | F | F | F |
| 0.5048094079277874 | 0.3737976480180549 | 0.3962431124157817 | F | F | F |
| 0.1952649781981322 | 0.2011837554504723 | 0.4908895354477991 | F | F | F |
| 0.7398252623532585 | 0.0659553735405114 | 0.5095415817741941 | T | T | T |
| 0.4173467632743576 | 0.3960662820066110 | 0.6002830586519271 | T | T | T |
| 0.9608162069220941 | 0.2681642596047351 | 0.6283138857106018 | T | T | T |
| 0.4926707454419089 | 0.1193634948163018 | 0.7168683843798065 | T | T | T |
| 0.2714512792191499 | 0.6821371801952125 | 0.2833757602793625 | F | F | F |
| 0.9619068494894876 | 0.5095232876276299 | 0.3780221833113870 | F | F | F |
| 0.5048094079277874 | 0.8737976480180549 | 0.3962431124157817 | F | F | F |
| 0.1952649781981322 | 0.7011837554504723 | 0.4908895354477991 | F | F | F |
| 0.7377845605323470 | 0.5684176004636674 | 0.5099077566627890 | T | T | T |
| 0.4103606206027352 | 0.8999248908447092 | 0.6001682105800213 | T | T | T |
| 0.9627426390243883 | 0.7580581092236772 | 0.6289380383331578 | T | T | T |
| 0.5894073210691952 | 0.6018098515834970 | 0.7066598258295235 | T | T | T |

**Figure 3. (101)-II**

C O La

1.0000000000000000

7.3320504567344598 0.0000000000000000 0.0000000000000000

2.1166768493587393 7.5893349481880668 0.0000000000000000

0.0000000000000000 0.0000000000000000 26.4666250656236741

C O La

1 26 16

Selective dynamics

Direct

|                    |                    |                    |   |   |   |
|--------------------|--------------------|--------------------|---|---|---|
| 0.2195431823605118 | 0.2494935151853423 | 0.7180561792628342 | T | T | T |
| 0.3537212592067617 | 0.2499877191224992 | 0.7501924704919684 | T | T | T |
| 0.0476338566674366 | 0.2669653746344727 | 0.7307029046944508 | T | T | T |
| 0.6166790643543223 | 0.0958302339114212 | 0.3306989717953783 | F | F | F |
| 0.9662841158585209 | 0.2584289710353715 | 0.3283033998687301 | F | F | F |
| 0.2670740128501166 | 0.4332314967874709 | 0.3330945437220194 | F | F | F |
| 0.8500371930629598 | 0.2874907017342565 | 0.4435663239317904 | F | F | F |
| 0.1996422445671584 | 0.4500894388582140 | 0.4411707520051493 | F | F | F |
| 0.5004321415587540 | 0.1248919646103062 | 0.4459618958584386 | F | F | F |
| 0.0960261641657362 | 0.4834990461901231 | 0.5573459598338694 | T | T | T |
| 0.4324236524283635 | 0.1374524737507301 | 0.5533302728759423 | T | T | T |
| 0.7360226358751758 | 0.3136867153272592 | 0.5593878280619314 | T | T | T |
| 0.2664038876090066 | 0.2292757539797506 | 0.6686220894548512 | T | T | T |

|                    |                    |                    |   |   |   |
|--------------------|--------------------|--------------------|---|---|---|
| 0.6340212700391213 | 0.3230728251705089 | 0.6719146523489122 | T | T | T |
| 0.9214053899141526 | 0.0040926596116246 | 0.6686751442942368 | T | T | T |
| 0.6166790643543223 | 0.5958302339114212 | 0.3306989717953783 | F | F | F |
| 0.9662841158585209 | 0.7584289710353715 | 0.3283033998687301 | F | F | F |
| 0.2670740128501166 | 0.9332314967874709 | 0.3330945437220194 | F | F | F |
| 0.8500371930629598 | 0.7874907017342565 | 0.4435663239317904 | F | F | F |
| 0.1996422445671584 | 0.9500894388582140 | 0.4411707520051493 | F | F | F |
| 0.5004321415587540 | 0.6248919646103133 | 0.4459618958584386 | F | F | F |
| 0.1005293250329435 | 0.9633521307009980 | 0.5568879014519668 | T | T | T |
| 0.4434157670213491 | 0.6417721006222373 | 0.5506315999807853 | T | T | T |
| 0.7336544410787077 | 0.8195070763776309 | 0.5616425367311259 | T | T | T |
| 0.3287329855155265 | 0.6578431049963178 | 0.6536438044590666 | T | T | T |
| 0.5666116386000569 | 0.8824884535769155 | 0.6875364098918513 | T | T | T |
| 0.8402224794518768 | 0.5603939904651606 | 0.6613728292154699 | T | T | T |
| 0.2714512792191499 | 0.1821371801952125 | 0.2833757602793625 | F | F | F |
| 0.9619068494894876 | 0.0095232876276299 | 0.3780221833113870 | F | F | F |
| 0.5048094079277874 | 0.3737976480180549 | 0.3962431124157817 | F | F | F |
| 0.1952649781981322 | 0.2011837554504723 | 0.4908895354477991 | F | F | F |
| 0.7380731770792153 | 0.0639233195906927 | 0.5093541094735702 | T | T | T |
| 0.4188707199102549 | 0.3963870630005100 | 0.5992785791842887 | T | T | T |
| 0.9413206706392078 | 0.2698316439417424 | 0.6306003085127133 | T | T | T |
| 0.6778625378571025 | 0.0867073939423102 | 0.7212267797352820 | T | T | T |
| 0.2714512792191499 | 0.6821371801952125 | 0.2833757602793625 | F | F | F |
| 0.9619068494894876 | 0.5095232876276299 | 0.3780221833113870 | F | F | F |
| 0.5048094079277874 | 0.8737976480180549 | 0.3962431124157817 | F | F | F |
| 0.1952649781981322 | 0.7011837554504723 | 0.4908895354477991 | F | F | F |
| 0.7397944351132942 | 0.5658825508510146 | 0.5089644134339388 | T | T | T |
| 0.4191545106173882 | 0.8900585276354266 | 0.6014374159784752 | T | T | T |
| 0.9804300581958493 | 0.7521857638143106 | 0.6222890773080997 | T | T | T |
| 0.5764554603331146 | 0.6014258917675814 | 0.7073240782824496 | T | T | T |

**Figure 3. (111)-I**

O La

|                     |                    |                     |
|---------------------|--------------------|---------------------|
| 1.0000000000000000  |                    |                     |
| 6.8234000000000004  | 0.0000000000000000 | 0.0000000000000000  |
| -3.4117236276940459 | 6.4899793757942073 | 0.0000000000000000  |
| 0.0000000000000016  | 0.0000000000000026 | 25.7149999999999999 |

La O C  
12 20 1

Selective dynamics

Direct

|                    |                    |                    |   |   |   |
|--------------------|--------------------|--------------------|---|---|---|
| 0.9219846346797027 | 0.2553166819266224 | 0.0439432237993387 | F | F | F |
| 0.4681585665774435 | 0.3474587312881923 | 0.1169356406766511 | F | F | F |
| 0.0141859439715617 | 0.4396007806497622 | 0.1898891697452854 | F | F | F |
| 0.5478367964378639 | 0.5216639556027575 | 0.2663169609997603 | T | T | T |
| 0.0961742746496543 | 0.6009545730350596 | 0.3496433071428779 | T | T | T |
| 0.6775566802466968 | 0.7748734204686250 | 0.3998825436352105 | T | T | T |
| 0.4800332923790691 | 0.7044706516406336 | 0.0078164495430713 | F | F | F |
| 0.0260606697731873 | 0.7966127010022035 | 0.0808088664203765 | F | F | F |
| 0.5721759798694777 | 0.8887547503637734 | 0.1538012832976889 | F | F | F |
| 0.1106109662052538 | 0.9747429749842554 | 0.2250597083537680 | T | T | T |
| 0.6518696051628035 | 0.0615680100389434 | 0.2918232629587286 | T | T | T |
| 0.2907806839600374 | 0.1434496113748520 | 0.3828209813794672 | T | T | T |
| 0.7009704423389636 | 0.4798166249363334 | 0.0258603927668659 | F | F | F |
| 0.2469978197330818 | 0.5719586742979033 | 0.0988528096441783 | F | F | F |
| 0.7931131298293721 | 0.6641007236594731 | 0.1718452265214836 | F | F | F |

|                    |                    |                    |   |   |   |
|--------------------|--------------------|--------------------|---|---|---|
| 0.3621512622571447 | 0.7647979718201138 | 0.2413973566185627 | T | T | T |
| 0.8037146622303358 | 0.8278505402046054 | 0.3106135223450648 | T | T | T |
| 0.4371840629909373 | 0.9041542911007238 | 0.3658758737660274 | T | T | T |
| 0.1953125813377383 | 0.8018515466180745 | 0.0000000000000000 | F | F | F |
| 0.7413508490531768 | 0.8938395122850622 | 0.0729924168773124 | F | F | F |
| 0.2873782264472950 | 0.9859815616466321 | 0.1459848337546177 | F | F | F |
| 0.8435752256483171 | 0.0875435370362655 | 0.2142442637916543 | T | T | T |
| 0.3573275740584206 | 0.1618498685117989 | 0.2941656614426914 | T | T | T |
| 0.9220490783069598 | 0.2070017918775161 | 0.3842048670964185 | T | T | T |
| 0.2067639675224910 | 0.1579357869491815 | 0.0517596733424099 | F | F | F |
| 0.7527327231151588 | 0.2500778363107514 | 0.1247520902197152 | F | F | F |
| 0.2989066550128996 | 0.3422198856723213 | 0.1977445070970276 | F | F | F |
| 0.8583400539168128 | 0.4389936989423907 | 0.2758353967241529 | T | T | T |
| 0.3804278654851773 | 0.4945005938413893 | 0.3602069417379085 | T | T | T |
| 0.0243345570421415 | 0.8160082302576814 | 0.4053551912755420 | T | T | T |
| 0.7061253446963635 | 0.3478436154680777 | 0.4086326660207010 | T | T | T |
| 0.7155231631512283 | 0.0907996001951158 | 0.4569406502486171 | T | T | T |
| 0.7782867899683928 | 0.2140217114414344 | 0.4188133410315141 | T | T | T |

**Figure 3. (111)-II**

O La

|                     |                    |                     |
|---------------------|--------------------|---------------------|
| 1.0000000000000000  |                    |                     |
| 6.8234000000000004  | 0.0000000000000000 | 0.0000000000000000  |
| -3.4117236276940459 | 6.4899793757942073 | 0.0000000000000000  |
| 0.0000000000000016  | 0.0000000000000026 | 25.7149999999999999 |

La O C  
12 20 1

Selective dynamics

Direct

|                    |                    |                    |   |   |   |
|--------------------|--------------------|--------------------|---|---|---|
| 0.9219846346797027 | 0.2553166819266224 | 0.0439432237993387 | F | F | F |
| 0.4681585665774435 | 0.3474587312881923 | 0.1169356406766511 | F | F | F |
| 0.0141859439715617 | 0.4396007806497622 | 0.1898891697452854 | F | F | F |
| 0.5503473366594361 | 0.5236306579780613 | 0.2665556404368335 | T | T | T |
| 0.0924993015257324 | 0.5885381613804240 | 0.3402475343798669 | T | T | T |
| 0.6124639522026600 | 0.6517559078197472 | 0.4241106019479955 | T | T | T |
| 0.4800332923790691 | 0.7044706516406336 | 0.0078164495430713 | F | F | F |
| 0.0260606697731873 | 0.7966127010022035 | 0.0808088664203765 | F | F | F |
| 0.5721759798694777 | 0.8887547503637734 | 0.1538012832976889 | F | F | F |
| 0.1041500631047435 | 0.9762499822500728 | 0.2254851117060768 | T | T | T |
| 0.6617482473775330 | 0.0655780102190651 | 0.2978827542473657 | T | T | T |
| 0.1548950673379499 | 0.1015028422034667 | 0.3679852929359979 | T | T | T |
| 0.7009704423389636 | 0.4798166249363334 | 0.0258603927668659 | F | F | F |
| 0.2469978197330818 | 0.5719586742979033 | 0.0988528096441783 | F | F | F |
| 0.7931131298293721 | 0.6641007236594731 | 0.1718452265214836 | F | F | F |
| 0.3433611960494438 | 0.7356183411938495 | 0.2526122589359465 | T | T | T |
| 0.8718332914212629 | 0.8629078356147196 | 0.3037834574604921 | T | T | T |
| 0.4425016667467201 | 0.9092945264694734 | 0.3862411182797128 | T | T | T |
| 0.1953125813377383 | 0.8018515466180745 | 0.0000000000000000 | F | F | F |
| 0.7413508490531768 | 0.8938395122850622 | 0.0729924168773124 | F | F | F |
| 0.2873782264472950 | 0.9859815616466321 | 0.1459848337546177 | F | F | F |
| 0.8294429760413885 | 0.0875229417802180 | 0.2155921296921929 | T | T | T |
| 0.3616289063706762 | 0.1560051707952365 | 0.2934641523163447 | T | T | T |
| 0.9288962794414045 | 0.2496951670414741 | 0.3620384435285764 | T | T | T |
| 0.2067639675224910 | 0.1579357869491815 | 0.0517596733424099 | F | F | F |
| 0.7527327231151588 | 0.2500778363107514 | 0.1247520902197152 | F | F | F |
| 0.2989066550128996 | 0.3422198856723213 | 0.1977445070970276 | F | F | F |

|                    |                    |                    |   |   |   |
|--------------------|--------------------|--------------------|---|---|---|
| 0.8420630879931396 | 0.4322903230580081 | 0.2723064227234736 | T | T | T |
| 0.3966842791634841 | 0.4993294497254092 | 0.3569875775224871 | T | T | T |
| 0.9450680138904924 | 0.7396073482927876 | 0.4049203026225520 | T | T | T |
| 0.4719922032276620 | 0.1783868502578034 | 0.4351508678600707 | T | T | T |
| 0.6074953790273999 | 0.9639343684674291 | 0.4639256036839989 | T | T | T |
| 0.5108072890297526 | 0.0230779166450539 | 0.4300736352638407 | T | T | T |

**Figure 3. (111)-III**

O La

|                     |                    |                     |
|---------------------|--------------------|---------------------|
| 1.0000000000000000  |                    |                     |
| 6.8234000000000004  | 0.0000000000000000 | 0.0000000000000000  |
| -3.4117236276940459 | 6.4899793757942073 | 0.0000000000000000  |
| 0.0000000000000016  | 0.0000000000000026 | 25.7149999999999999 |

La O C  
12 20 1

Selective dynamics

Direct

|                     |                    |                    |   |   |   |
|---------------------|--------------------|--------------------|---|---|---|
| 0.9219846346797027  | 0.2553166819266224 | 0.0439432237993387 | F | F | F |
| 0.4681585665774435  | 0.3474587312881923 | 0.1169356406766511 | F | F | F |
| 0.0141859439715617  | 0.4396007806497622 | 0.1898891697452854 | F | F | F |
| 0.5671183210842501  | 0.5297639808230344 | 0.2604421725594651 | T | T | T |
| -0.0169796310323153 | 0.5134770174873723 | 0.3673385143665035 | T | T | T |
| 0.5842370711999006  | 0.8121614008481204 | 0.4246460054075371 | T | T | T |
| 0.4800332923790691  | 0.7044706516406336 | 0.0078164495430713 | F | F | F |
| 0.0260606697731873  | 0.7966127010022035 | 0.0808088664203765 | F | F | F |
| 0.5721759798694777  | 0.8887547503637734 | 0.1538012832976889 | F | F | F |
| 0.1066971492640548  | 0.9854750319580988 | 0.2251489012163367 | T | T | T |
| 0.6254275453829362  | 0.0374989673994218 | 0.2950029768786377 | T | T | T |
| 0.1285176020240308  | 0.0450301313546545 | 0.3695013280475836 | T | T | T |
| 0.7009704423389636  | 0.4798166249363334 | 0.0258603927668659 | F | F | F |
| 0.2469978197330818  | 0.5719586742979033 | 0.0988528096441783 | F | F | F |
| 0.7931131298293721  | 0.6641007236594731 | 0.1718452265214836 | F | F | F |
| 0.3805998678457059  | 0.7535184492095679 | 0.2377750314184201 | T | T | T |
| 0.8457625797456619  | 0.8492693468034799 | 0.2988210078407678 | T | T | T |
| 0.3248997386756954  | 0.8249869561790560 | 0.3678874203703810 | T | T | T |
| 0.1953125813377383  | 0.8018515466180745 | 0.0000000000000000 | F | F | F |
| 0.7413508490531768  | 0.8938395122850622 | 0.0729924168773124 | F | F | F |
| 0.2873782264472950  | 0.9859815616466321 | 0.1459848337546177 | F | F | F |
| 0.8363241772882732  | 0.0980858153376439 | 0.2154613187846726 | T | T | T |
| 0.3551757590830342  | 0.1787545396016354 | 0.2955263444208165 | T | T | T |
| 0.8231620304324176  | 0.1362494669473102 | 0.3803454777751565 | T | T | T |
| 0.2067639675224910  | 0.1579357869491815 | 0.0517596733424099 | F | F | F |
| 0.7527327231151588  | 0.2500778363107514 | 0.1247520902197152 | F | F | F |
| 0.2989066550128996  | 0.3422198856723213 | 0.1977445070970276 | F | F | F |
| 0.8465919616188510  | 0.4210669544460213 | 0.2828466321716698 | T | T | T |
| 0.3012703874429233  | 0.4381550503126122 | 0.4021563952674137 | T | T | T |
| 0.8485895785164038  | 0.7204042630988499 | 0.4058313742237399 | T | T | T |
| 0.3907463808635806  | 0.5209216390195111 | 0.4861504593294217 | T | T | T |
| 0.2727826452108431  | 0.1906356954148674 | 0.4587340691571791 | T | T | T |
| 0.3208634953103206  | 0.3787438287068612 | 0.4516914483207625 | T | T | T |

**Table S5.** Optimized Fractional Coordinates for the Stationary States Shown in Figure 5.

**Figure 5 (a). O<sub>2</sub> Physisorption**

| O                   | La                 | C                  | H |                     |   |  |
|---------------------|--------------------|--------------------|---|---------------------|---|--|
| 1.0000000000000000  |                    |                    |   |                     |   |  |
| 7.8789800000000003  | 0.0000000000000000 |                    |   | 0.0000000000000000  |   |  |
| -3.9394900000000002 | 6.8233968359095165 |                    |   | 0.0000000000000000  |   |  |
| 0.0000000000000000  | 0.0000000000000000 |                    |   | 25.5688315207999963 |   |  |
| O                   | La                 |                    |   |                     |   |  |
| 26                  | 16                 |                    |   |                     |   |  |
| Selective dynamics  |                    |                    |   |                     |   |  |
| Direct              |                    |                    |   |                     |   |  |
| 0.0000000000000000  | 0.0000000000000000 | 0.3790943669879780 | F | F                   | F |  |
| 0.1666325478852855  | 0.3332650957705710 | 0.2933258797492897 | F | F                   | F |  |
| 0.3333486385380624  | 0.1666325478852855 | 0.4648237441093741 | F | F                   | F |  |
| -0.0009031953782231 | 0.0008441770181977 | 0.6204005201125846 | T | T                   | T |  |
| 0.1670845165479568  | 0.3334108782167831 | 0.5349515971046188 | T | T                   | T |  |
| 0.3338730478571227  | 0.1653793117573035 | 0.7043927244828531 | T | T                   | T |  |
| 0.9999897345183015  | 0.5000441982274353 | 0.3790943669879780 | F | F                   | F |  |
| 0.1666222824035870  | 0.8333092939980062 | 0.2933258797492897 | F | F                   | F |  |
| 0.3333383730563639  | 0.6666767461127208 | 0.4648237441093741 | F | F                   | F |  |
| -0.0011368429562564 | 0.4971883806456222 | 0.6204377914782515 | T | T                   | T |  |
| 0.1668454976192922  | 0.8331530992269213 | 0.5354792410546694 | T | T                   | T |  |
| 0.3334894126133622  | 0.6665706195092375 | 0.7043969355302119 | T | T                   | T |  |
| 0.4999378092088094  | 0.0000000000000000 | 0.3790943669879780 | F | F                   | F |  |
| 0.6665703570940948  | 0.3332650957705710 | 0.2933258797492897 | F | F                   | F |  |
| 0.8332864477468647  | 0.1666325478852855 | 0.4648237441093741 | F | F                   | F |  |
| 0.5027552791832446  | 0.0011557487914876 | 0.6205089045517403 | T | T                   | T |  |
| 0.6665848372365164  | 0.3333359104970600 | 0.5350250683807192 | T | T                   | T |  |
| 0.8341218971375665  | 0.1660891984302268 | 0.7052784688508045 | T | T                   | T |  |
| 0.5000544637091338  | 0.5000441982274353 | 0.3790943669879780 | F | F                   | F |  |
| 0.6666870115944192  | 0.8333092939980062 | 0.2933258797492897 | F | F                   | F |  |
| 0.8332761822651662  | 0.6666767461127208 | 0.4648237441093741 | F | F                   | F |  |
| 0.5001194755801527  | 0.4997388686074792 | 0.6202701053541078 | T | T                   | T |  |
| 0.6665223081623416  | 0.8328829195526957 | 0.5349754397372405 | T | T                   | T |  |
| 0.8347362546306130  | 0.6661626927344757 | 0.7043647069679605 | T | T                   | T |  |
| 0.4184150454146157  | 0.4399828160892671 | 0.8174918237740508 | T | T                   | T |  |
| 0.5709480890322227  | 0.6005692448310058 | 0.8177921000023148 | T | T                   | T |  |
| 0.1666325478852855  | 0.3332650957705710 | 0.4388937363395371 | F | F                   | F |  |
| 0.3333486385380624  | 0.1666325478852855 | 0.3192558875191267 | F | F                   | F |  |
| 0.1668183890167258  | 0.3324345624086925 | 0.6808546106105240 | T | T                   | T |  |
| 0.3337070165351256  | 0.1669887293443328 | 0.5611434402780449 | T | T                   | T |  |
| 0.1666222824035870  | 0.8333092939980062 | 0.4388937363395371 | F | F                   | F |  |
| 0.3333383730563639  | 0.6666767461127208 | 0.3192558875191267 | F | F                   | F |  |
| 0.1673930067146234  | 0.8327140335374589 | 0.6805663045585595 | T | T                   | T |  |
| 0.3337040849495069  | 0.6662767775263367 | 0.5611339085088058 | T | T                   | T |  |
| 0.6665703570940948  | 0.3332650957705710 | 0.4388937363395371 | F | F                   | F |  |
| 0.8332864477468647  | 0.1666325478852855 | 0.3192558875191267 | F | F                   | F |  |
| 0.6679615070240671  | 0.3321222926044088 | 0.6804918257216783 | T | T                   | T |  |
| 0.8334276426413308  | 0.1665223739371021 | 0.5611059790462781 | T | T                   | T |  |
| 0.6666870115944192  | 0.8333092939980062 | 0.4388937363395371 | F | F                   | F |  |
| 0.8332761822651662  | 0.6666767461127208 | 0.3192558875191267 | F | F                   | F |  |
| 0.6677847189790167  | 0.8333554646853886 | 0.6808762775125788 | T | T                   | T |  |
| 0.8329630949711503  | 0.6662837141507199 | 0.5611521501375959 | T | T                   | T |  |

**Figure 5 (a). O<sub>2</sub> Transition State**

```

O   La
1.0000000000000000
  7.8789800000000003   0.0000000000000000   0.0000000000000000
 -3.9394900000000002   6.8233968359095201   0.0000000000000000
  0.0000000000000000   0.0000000000000000   25.5688315207999999

```

```

O   La
26  16

```

Selective dynamics

Direct

|                    |                    |                    |   |   |   |
|--------------------|--------------------|--------------------|---|---|---|
| 0.0000000000000000 | 0.0000000000000000 | 0.3790943669879780 | F | F | F |
| 0.1666325478852855 | 0.3332650957705710 | 0.2933258797492897 | F | F | F |
| 0.3333486385380624 | 0.1666325478852855 | 0.4648237441093741 | F | F | F |
| 0.0192440032893259 | 0.0030841266871954 | 0.6212007843285109 | T | T | T |
| 0.1655042846689095 | 0.3374123631841708 | 0.5358193735041542 | T | T | T |
| 0.3281908008213666 | 0.1502195244576970 | 0.7164773115732098 | T | T | T |
| 0.9999922729179431 | 0.5000441982274353 | 0.3790943669879780 | F | F | F |
| 0.1666222824035870 | 0.8333092939980062 | 0.2933258797492897 | F | F | F |
| 0.3333383730563639 | 0.6666767461127208 | 0.4648237441093741 | F | F | F |
| 0.9889765945432869 | 0.5028385252538022 | 0.6218591788504227 | T | T | T |
| 0.1686579040583493 | 0.8308531677009682 | 0.5352416284494677 | T | T | T |
| 0.3274711824057294 | 0.6674883621606456 | 0.6977504322572479 | T | T | T |
| 0.4999378092088094 | 0.0000000000000000 | 0.3790943669879780 | F | F | F |
| 0.6665703570940948 | 0.3332650957705710 | 0.2933258797492897 | F | F | F |
| 0.8332864477468647 | 0.1666325478852855 | 0.4648237441093741 | F | F | F |
| 0.4863505205011039 | 0.0185995361583516 | 0.6219021429643659 | T | T | T |
| 0.6713640096210703 | 0.3333016363082641 | 0.5338154744410895 | T | T | T |
| 0.8344025870655747 | 0.1576677189937095 | 0.7042401740875240 | T | T | T |
| 0.5000544637091338 | 0.5000441982274353 | 0.3790943669879780 | F | F | F |
| 0.6666870115944192 | 0.8333092939980062 | 0.2933258797492897 | F | F | F |
| 0.8332761822651662 | 0.6666767461127208 | 0.4648237441093741 | F | F | F |
| 0.5164646048039118 | 0.4993278093399394 | 0.6189609731733055 | T | T | T |
| 0.6661000319177599 | 0.8374038463969743 | 0.5363378519575726 | T | T | T |
| 0.8601155667052018 | 0.6797258937768546 | 0.7103377185764957 | T | T | T |
| 0.3451263820521475 | 0.2933501364624106 | 0.7551108872453525 | T | T | T |
| 0.6142203671617505 | 0.5253664722482094 | 0.7376719544578598 | T | T | T |
| 0.1666325478852855 | 0.3332650957705710 | 0.4388937363395371 | F | F | F |
| 0.3333486385380624 | 0.1666325478852855 | 0.3192558875191267 | F | F | F |
| 0.1647677428749513 | 0.3291590821249686 | 0.6847212919318189 | T | T | T |
| 0.3366234948323021 | 0.1692302643575862 | 0.5610754465362077 | T | T | T |
| 0.1666222824035870 | 0.8333092939980062 | 0.4388937363395371 | F | F | F |
| 0.3333383730563639 | 0.6666767461127208 | 0.3192558875191267 | F | F | F |
| 0.1698309655010368 | 0.8313679381267743 | 0.6748326282662057 | T | T | T |
| 0.3348143200457158 | 0.6668003049615405 | 0.5609853456037746 | T | T | T |
| 0.6665703570940948 | 0.3332650957705710 | 0.4388937363395371 | F | F | F |
| 0.8332864477468647 | 0.1666325478852855 | 0.3192558875191267 | F | F | F |
| 0.6798173163819992 | 0.3349233143032241 | 0.6807715577719228 | T | T | T |
| 0.8350690359220813 | 0.1693112301446485 | 0.5616658862465445 | T | T | T |
| 0.6666870115944192 | 0.8333092939980062 | 0.4388937363395371 | F | F | F |
| 0.8332761822651662 | 0.6666767461127208 | 0.3192558875191267 | F | F | F |
| 0.6607876454942493 | 0.8137663404352871 | 0.6874045175438170 | T | T | T |
| 0.8315433828980534 | 0.6651700069782283 | 0.5608355089607904 | T | T | T |

**Figure 5 (a). O<sub>2</sub> Chemisorption**

```

O   La   C   H
1.0000000000000000
  7.8789800000000003   0.0000000000000000   0.0000000000000000

```

|                       |                      |                      |   |   |   |
|-----------------------|----------------------|----------------------|---|---|---|
| -3.939490000000000002 | 6.8233968359095165   | 0.000000000000000000 |   |   |   |
| 0.000000000000000000  | 0.000000000000000000 | 25.5688315207999963  |   |   |   |
| O                     | La                   |                      |   |   |   |
| 26                    | 16                   |                      |   |   |   |
| Selective dynamics    |                      |                      |   |   |   |
| Direct                |                      |                      |   |   |   |
| 0.000000000000000000  | 0.000000000000000000 | 0.3790943669879780   | F | F | F |
| 0.1666325478852855    | 0.3332650957705710   | 0.2933258797492897   | F | F | F |
| 0.3333486385380624    | 0.1666325478852855   | 0.4648237441093741   | F | F | F |
| -0.0078255630831968   | 0.0109445326211028   | 0.6194731047828126   | T | T | T |
| 0.1695683633978310    | 0.3361053222902954   | 0.5350088000124196   | T | T | T |
| 0.2982634270600202    | 0.1209721781866457   | 0.7090329968211897   | T | T | T |
| 0.9999897345183015    | 0.5000441982274353   | 0.3790943669879780   | F | F | F |
| 0.1666222824035870    | 0.8333092939980062   | 0.2933258797492897   | F | F | F |
| 0.3333383730563639    | 0.6666767461127208   | 0.4648237441093741   | F | F | F |
| 0.0071724165316617    | 0.5064725949119965   | 0.6196752430695069   | T | T | T |
| 0.1668125060567144    | 0.8336244718075376   | 0.5369399886917616   | T | T | T |
| 0.3334098834491682    | 0.6703782430694607   | 0.6997404274999351   | T | T | T |
| 0.4999378092088094    | 0.000000000000000000 | 0.3790943669879780   | F | F | F |
| 0.6665703570940948    | 0.3332650957705710   | 0.2933258797492897   | F | F | F |
| 0.8332864477468647    | 0.1666325478852855   | 0.4648237441093741   | F | F | F |
| 0.4963236342230963    | -0.0026218703431821  | 0.6200990762402502   | T | T | T |
| 0.6676280265484529    | 0.3337382236035167   | 0.5338595863576125   | T | T | T |
| 0.8260843079663664    | 0.1771944937008900   | 0.7075812562088925   | T | T | T |
| 0.5000544637091338    | 0.5000441982274353   | 0.3790943669879780   | F | F | F |
| 0.6666870115944192    | 0.8333092939980062   | 0.2933258797492897   | F | F | F |
| 0.8332761822651662    | 0.6666767461127208   | 0.4648237441093741   | F | F | F |
| 0.5142352626034233    | 0.4813324699320201   | 0.6239210664408793   | T | T | T |
| 0.6646662799779239    | 0.8306576112916476   | 0.5353560741029467   | T | T | T |
| 0.8792649639173440    | 0.7016075869607625   | 0.7079090421127373   | T | T | T |
| 0.3728916335014817    | 0.2924673232683242   | 0.7434555181039718   | T | T | T |
| 0.7102476440898402    | 0.6299661480633106   | 0.7431429515689285   | T | T | T |
| 0.1666325478852855    | 0.3332650957705710   | 0.4388937363395371   | F | F | F |
| 0.3333486385380624    | 0.1666325478852855   | 0.3192558875191267   | F | F | F |
| 0.1561392588544647    | 0.3325477591663656   | 0.6842141158638556   | T | T | T |
| 0.3380745216619270    | 0.1723391012298531   | 0.5611355371314001   | T | T | T |
| 0.1666222824035870    | 0.8333092939980062   | 0.4388937363395371   | F | F | F |
| 0.3333383730563639    | 0.6666767461127208   | 0.3192558875191267   | F | F | F |
| 0.1793112090637834    | 0.8235562146922429   | 0.6681662770818688   | T | T | T |
| 0.3338092761720997    | 0.6660985913798112   | 0.5594180806072888   | T | T | T |
| 0.6665703570940948    | 0.3332650957705710   | 0.4388937363395371   | F | F | F |
| 0.8332864477468647    | 0.1666325478852855   | 0.3192558875191267   | F | F | F |
| 0.6513275009290018    | 0.3486997321957436   | 0.6916967907021034   | T | T | T |
| 0.8340186934297500    | 0.1669227482621798   | 0.5629409286317358   | T | T | T |
| 0.6666870115944192    | 0.8333092939980062   | 0.4388937363395371   | F | F | F |
| 0.8332761822651662    | 0.6666767461127208   | 0.3192558875191267   | F | F | F |
| 0.6710169600994945    | 0.8481592024078058   | 0.6844142983836748   | T | T | T |
| 0.8289088856117421    | 0.6625566322110367   | 0.5610813481085781   | T | T | T |

**Figure 5 (b). O<sub>2</sub> Physisorption on O<sub>5c</sub>**

|                       |                      |                      |  |  |
|-----------------------|----------------------|----------------------|--|--|
| O                     | La                   |                      |  |  |
| 1.0000000000000000    |                      |                      |  |  |
| 7.878980000000000003  | 0.000000000000000000 | 0.000000000000000000 |  |  |
| -1.969745000000000001 | 7.0625114891995047   | 0.000000000000000000 |  |  |
| 0.000000000000000000  | 0.000000000000000000 | 25.8263268595284643  |  |  |

|                    |                    |                    |   |   |   |
|--------------------|--------------------|--------------------|---|---|---|
| O                  | La                 |                    |   |   |   |
| 26                 | 16                 |                    |   |   |   |
| Selective dynamics |                    |                    |   |   |   |
| Direct             |                    |                    |   |   |   |
| 0.4041914058465323 | 0.6166361650044720 | 0.3264885496827432 | F | F | F |
| 0.0110088316484749 | 0.0440353265938924 | 0.3626144767290000 | F | F | F |
| 0.2973597212320982 | 0.1893094265467212 | 0.2904013428155352 | F | F | F |
| 0.2124952295362732 | 0.8499809181450857 | 0.4421844446604553 | F | F | F |
| 0.3193773845290409 | 0.2773800797345061 | 0.4782716515276633 | F | F | F |
| 0.1056635449218319 | 0.4226541796873349 | 0.4060585176142055 | F | F | F |
| 0.0204297431280033 | 0.0843511925893536 | 0.5623608611836756 | T | T | T |
| 0.1307121104342525 | 0.5232620377684090 | 0.5937312350252788 | T | T | T |
| 0.4161228504779564 | 0.6621099385823097 | 0.5212234476900891 | T | T | T |
| 0.3157092023111468 | 0.3010957999843178 | 0.6644503976522850 | T | T | T |
| 0.4376750969437918 | 0.7538825219346793 | 0.7055888584375953 | T | T | T |
| 0.2241605357542670 | 0.8909553949449971 | 0.6362488235332019 | T | T | T |
| 0.9041292150553417 | 0.6166361650044720 | 0.3264885496827432 | F | F | F |
| 0.5109466408572771 | 0.0440353265938924 | 0.3626144767290000 | F | F | F |
| 0.7972975304409005 | 0.1893094265467212 | 0.2904013428155352 | F | F | F |
| 0.7124330387450755 | 0.8499809181450857 | 0.4421844446604553 | F | F | F |
| 0.8193151937378502 | 0.2773800797345061 | 0.4782716515276633 | F | F | F |
| 0.6056013541306413 | 0.4226541796873349 | 0.4060585176142055 | F | F | F |
| 0.5221432231763512 | 0.0868006565382146 | 0.5619175633385429 | T | T | T |
| 0.6300336920956683 | 0.5211972573353300 | 0.5953341512642626 | T | T | T |
| 0.9147803268188138 | 0.6624044166881528 | 0.5212362550273403 | T | T | T |
| 0.8345400268684593 | 0.3024380886071584 | 0.6646527976904917 | T | T | T |
| 0.9385265295262163 | 0.7543608205734935 | 0.7056305747090452 | T | T | T |
| 0.7207654767294706 | 0.8920490515085605 | 0.6367650727898337 | T | T | T |
| 0.5072579001561583 | 0.3329782479272146 | 0.7676003081482112 | T | T | T |
| 0.5959888854181039 | 0.2127024110884745 | 0.7646523301283176 | T | T | T |
| 0.0872918933927096 | 0.3491675735708455 | 0.3165761838479781 | F | F | F |
| 0.2210261891095229 | 0.8841047564380986 | 0.3364396356965571 | F | F | F |
| 0.3956958444457825 | 0.5826539194014728 | 0.4322333586466414 | F | F | F |
| 0.0293804831775972 | 0.1175219327103818 | 0.4520968104952274 | F | F | F |
| 0.2050911424695000 | 0.8203611952689104 | 0.5475343389834589 | T | T | T |
| 0.3397105110776937 | 0.3572687673194784 | 0.5694033380738195 | T | T | T |
| 0.0126950433062854 | 0.0511503268535527 | 0.6610728558948156 | T | T | T |
| 0.1489046289450384 | 0.5978562994804479 | 0.6823712289246995 | T | T | T |
| 0.5872297026015190 | 0.3491675735708455 | 0.3165761838479781 | F | F | F |
| 0.7209639983183322 | 0.8841047564380986 | 0.3364396356965571 | F | F | F |
| 0.8956336536545919 | 0.5826539194014728 | 0.4322333586466414 | F | F | F |
| 0.5293182923863995 | 0.1175219327103818 | 0.4520968104952274 | F | F | F |
| 0.7048032130486713 | 0.8202967393985948 | 0.5479345171178738 | T | T | T |
| 0.8387155173393093 | 0.3573104003293638 | 0.5694749455730795 | T | T | T |
| 0.5120602927936110 | 0.0493119298355902 | 0.6623663842301809 | T | T | T |
| 0.6502125217344791 | 0.6012976460288962 | 0.6839985982322575 | T | T | T |

**Figure 5 (b). O<sub>2</sub> Transition State on O<sub>5c</sub>**

|                     |                    |                     |  |
|---------------------|--------------------|---------------------|--|
| O                   | La                 |                     |  |
| 1.0000000000000000  |                    |                     |  |
| 7.8789800000000003  | 0.0000000000000000 | 0.0000000000000000  |  |
| -1.9697450000000001 | 7.0625114891995002 | 0.0000000000000000  |  |
| 0.0000000000000000  | 0.0000000000000000 | 25.8263268595284998 |  |
| O                   | La                 |                     |  |
| 26                  | 16                 |                     |  |
| Selective dynamics  |                    |                     |  |



Direct

|                    |                    |                    |   |   |   |
|--------------------|--------------------|--------------------|---|---|---|
| 0.4041914058465323 | 0.6166361650044720 | 0.3264885496827432 | F | F | F |
| 0.0110088316484749 | 0.0440353265938924 | 0.3626144767290000 | F | F | F |
| 0.2973597212320982 | 0.1893094265467212 | 0.2904013428155352 | F | F | F |
| 0.2124952295362732 | 0.8499809181450858 | 0.4421844446604551 | F | F | F |
| 0.3193773845290409 | 0.2773800797345061 | 0.4782716515276633 | F | F | F |
| 0.1056635449218320 | 0.4226541796873349 | 0.4060585176142055 | F | F | F |
| 0.0182079837640052 | 0.0778767074237201 | 0.5605607014224296 | T | T | T |
| 0.1253730715914692 | 0.5148610333069500 | 0.5943931665238938 | T | T | T |
| 0.4148206766332640 | 0.6565141280380976 | 0.5223508963987056 | T | T | T |
| 0.2927392393767271 | 0.3073037244096909 | 0.6658009400296132 | T | T | T |
| 0.4320339106889686 | 0.7535503809466706 | 0.7082909152566402 | T | T | T |
| 0.2185034252182426 | 0.8867672371554495 | 0.6362238323050616 | T | T | T |
| 0.9041292150553417 | 0.6166361650044720 | 0.3264885496827432 | F | F | F |
| 0.5109466408572771 | 0.0440353265938924 | 0.3626144767290000 | F | F | F |
| 0.7972975304409076 | 0.1893094265467212 | 0.2904013428155352 | F | F | F |
| 0.7124330387450755 | 0.8499809181450858 | 0.4421844446604551 | F | F | F |
| 0.8193151937378502 | 0.2773800797345061 | 0.4782716515276633 | F | F | F |
| 0.6056013541306413 | 0.4226541796873349 | 0.4060585176142055 | F | F | F |
| 0.5185087955601831 | 0.0858028997096511 | 0.5581073788116820 | T | T | T |
| 0.6270646444633587 | 0.5115676989730333 | 0.5990547961405674 | T | T | T |
| 0.9093738938911352 | 0.6557025403569503 | 0.5220805601421554 | T | T | T |
| 0.8679291272697203 | 0.3207381331372062 | 0.6675656988143541 | T | T | T |
| 0.9402898375350807 | 0.7591058756236349 | 0.7081939734141345 | T | T | T |
| 0.7203245117897579 | 0.8998276048435695 | 0.6376192076906256 | T | T | T |
| 0.4901367250872691 | 0.2883305278371667 | 0.7302170057883463 | T | T | T |
| 0.7117171738021313 | 0.2912493380792501 | 0.7176211414147989 | T | T | T |
| 0.0872918933927096 | 0.3491675735708455 | 0.3165761838479781 | F | F | F |
| 0.2210261891095229 | 0.8841047564380986 | 0.3364396356965571 | F | F | F |
| 0.3956958444457825 | 0.5826539194014728 | 0.4322333586466413 | F | F | F |
| 0.0293804831775972 | 0.1175219327103818 | 0.4520968104952272 | F | F | F |
| 0.2021635315215952 | 0.8160642276440087 | 0.5476712918884045 | T | T | T |
| 0.3386915969991859 | 0.3535333579578702 | 0.5684498789426153 | T | T | T |
| 0.0094792368224179 | 0.0409184282241013 | 0.6628845822728698 | T | T | T |
| 0.1475735951798907 | 0.5966559795495181 | 0.6845963547642872 | T | T | T |
| 0.5872297026015190 | 0.3491675735708455 | 0.3165761838479781 | F | F | F |
| 0.7209639983183322 | 0.8841047564380986 | 0.3364396356965571 | F | F | F |
| 0.8956336536545919 | 0.5826539194014728 | 0.4322333586466413 | F | F | F |
| 0.5293182923863995 | 0.1175219327103818 | 0.4520968104952272 | F | F | F |
| 0.7022454935277439 | 0.8179508118234033 | 0.5499085976513752 | T | T | T |
| 0.8341195662199548 | 0.3538271684810370 | 0.5676823584602629 | T | T | T |
| 0.5020189502859262 | 0.0416115866831956 | 0.6662845453766741 | T | T | T |
| 0.6466387945627678 | 0.5997763591324312 | 0.6894959280240757 | T | T | T |

**Figure 5 (b). O<sub>2</sub> Chemisorption on O<sub>5c</sub>**

O La

|                     |                    |                     |
|---------------------|--------------------|---------------------|
| 1.0000000000000000  |                    |                     |
| 7.8789800000000003  | 0.0000000000000000 | 0.0000000000000000  |
| -1.9697450000000001 | 7.0625114891995047 | 0.0000000000000000  |
| 0.0000000000000000  | 0.0000000000000000 | 25.8263268595284643 |

O La  
26 16

Selective dynamics

Direct

|                    |                    |                    |   |   |   |
|--------------------|--------------------|--------------------|---|---|---|
| 0.4041914058465323 | 0.6166361650044720 | 0.3264885496827432 | F | F | F |
| 0.0110088316484749 | 0.0440353265938924 | 0.3626144767290000 | F | F | F |

|                    |                    |                    |   |   |   |
|--------------------|--------------------|--------------------|---|---|---|
| 0.2973597212320982 | 0.1893094265467212 | 0.2904013428155352 | F | F | F |
| 0.2124952295362732 | 0.8499809181450857 | 0.4421844446604553 | F | F | F |
| 0.3193773845290409 | 0.2773800797345061 | 0.4782716515276633 | F | F | F |
| 0.1056635449218319 | 0.4226541796873349 | 0.4060585176142055 | F | F | F |
| 0.0216701582538979 | 0.0866904154167974 | 0.5586788837593853 | T | T | T |
| 0.1292294714631477 | 0.5171796945954125 | 0.5958870148435529 | T | T | T |
| 0.4143904708260573 | 0.6577135160177046 | 0.5220721554632297 | T | T | T |
| 0.3273055123936119 | 0.3101338554737041 | 0.6626574150325110 | T | T | T |
| 0.4351720189737956 | 0.7408860680002223 | 0.7081818494509560 | T | T | T |
| 0.2220859556617760 | 0.8879691136550004 | 0.6392962634224850 | T | T | T |
| 0.9041292150553417 | 0.6166361650044720 | 0.3264885496827432 | F | F | F |
| 0.5109466408572771 | 0.0440353265938924 | 0.3626144767290000 | F | F | F |
| 0.7972975304409005 | 0.1893094265467212 | 0.2904013428155352 | F | F | F |
| 0.7124330387450755 | 0.8499809181450857 | 0.4421844446604553 | F | F | F |
| 0.8193151937378502 | 0.2773800797345061 | 0.4782716515276633 | F | F | F |
| 0.6056013541306413 | 0.4226541796873349 | 0.4060585176142055 | F | F | F |
| 0.5216554459925576 | 0.0866885428291218 | 0.5586488058960819 | T | T | T |
| 0.6291924309557253 | 0.5171969446011617 | 0.5958730698661487 | T | T | T |
| 0.9143806206890044 | 0.6577694149147929 | 0.5220678750933627 | T | T | T |
| 0.8270755999047666 | 0.3101068769591326 | 0.6626148527864126 | T | T | T |
| 0.9352111742877968 | 0.7408609892372532 | 0.7081300196723698 | T | T | T |
| 0.7219057107852075 | 0.8879664491215213 | 0.6392935216958819 | T | T | T |
| 0.3046100381265324 | 0.2188436332725363 | 0.7147283767364226 | T | T | T |
| 0.8050214499002257 | 0.2189319126895427 | 0.7147101756186235 | T | T | T |
| 0.0872918933927096 | 0.3491675735708455 | 0.3165761838479781 | F | F | F |
| 0.2210261891095229 | 0.8841047564380986 | 0.3364396356965571 | F | F | F |
| 0.3956958444457825 | 0.5826539194014728 | 0.4322333586466414 | F | F | F |
| 0.0293804831775972 | 0.1175219327103818 | 0.4520968104952274 | F | F | F |
| 0.2044434310658280 | 0.8178911837292113 | 0.5496884935357594 | T | T | T |
| 0.3376085167243421 | 0.3507112665329211 | 0.5668626413263159 | T | T | T |
| 0.0103696526204827 | 0.0414699914591311 | 0.6700135810961527 | T | T | T |
| 0.1484070315641470 | 0.5936101330859326 | 0.6848416075465475 | T | T | T |
| 0.5872297026015190 | 0.3491675735708455 | 0.3165761838479781 | F | F | F |
| 0.7209639983183322 | 0.8841047564380986 | 0.3364396356965571 | F | F | F |
| 0.8956336536545919 | 0.5826539194014728 | 0.4322333586466414 | F | F | F |
| 0.5293182923863995 | 0.1175219327103818 | 0.4520968104952274 | F | F | F |
| 0.7044113642198164 | 0.8179470857190397 | 0.5496733092536928 | T | T | T |
| 0.8376057580395403 | 0.3507593578093860 | 0.5668625171674749 | T | T | T |
| 0.5103383761123014 | 0.0415175838560166 | 0.6700584509759169 | T | T | T |
| 0.6483664092532817 | 0.5937024306134786 | 0.6848217620053577 | T | T | T |

**Figure 5 (b). O<sub>2</sub> Physisorption on O<sub>5c</sub>/O<sub>3c</sub>**

O La

|                     |                    |                     |
|---------------------|--------------------|---------------------|
| 1.0000000000000000  |                    |                     |
| 7.8789800000000003  | 0.0000000000000000 | 0.0000000000000000  |
| -1.9697450000000001 | 7.0625114891995047 | 0.0000000000000000  |
| 0.0000000000000000  | 0.0000000000000000 | 25.8263268595284643 |

O La  
26 16

Selective dynamics

Direct

|                    |                    |                    |   |   |   |
|--------------------|--------------------|--------------------|---|---|---|
| 0.4041914058465323 | 0.6166361650044720 | 0.3264885496827432 | F | F | F |
| 0.0110088316484749 | 0.0440353265938924 | 0.3626144767290000 | F | F | F |
| 0.2973597212320982 | 0.1893094265467212 | 0.2904013428155352 | F | F | F |
| 0.2124952295362732 | 0.8499809181450857 | 0.4421844446604553 | F | F | F |
| 0.3193773845290409 | 0.2773800797345061 | 0.4782716515276633 | F | F | F |

|                    |                    |                    |   |   |   |
|--------------------|--------------------|--------------------|---|---|---|
| 0.1056635449218319 | 0.4226541796873349 | 0.4060585176142055 | F | F | F |
| 0.0209480597829943 | 0.0841545417415301 | 0.5626525767925787 | T | T | T |
| 0.1300535117766939 | 0.5205876633308703 | 0.5945927457457483 | T | T | T |
| 0.4153363980599523 | 0.6614202087742724 | 0.5213234296923406 | T | T | T |
| 0.3241739559017327 | 0.2971361751004384 | 0.6652328800606530 | T | T | T |
| 0.4380842504294893 | 0.7522139667669966 | 0.7061159667785147 | T | T | T |
| 0.2218695457793743 | 0.8881407131054757 | 0.6364821510385892 | T | T | T |
| 0.9041292150553417 | 0.6166361650044720 | 0.3264885496827432 | F | F | F |
| 0.5109466408572771 | 0.0440353265938924 | 0.3626144767290000 | F | F | F |
| 0.7972975304409076 | 0.1893094265467212 | 0.2904013428155352 | F | F | F |
| 0.7124330387450755 | 0.8499809181450857 | 0.4421844446604553 | F | F | F |
| 0.8193151937378502 | 0.2773800797345061 | 0.4782716515276633 | F | F | F |
| 0.6056013541306413 | 0.4226541796873349 | 0.4060585176142055 | F | F | F |
| 0.5210759243440800 | 0.0840367264219515 | 0.5626551198738607 | T | T | T |
| 0.6301011403932379 | 0.5202964755767083 | 0.5945908025373137 | T | T | T |
| 0.9153880652642333 | 0.6615536612969003 | 0.5213084854058425 | T | T | T |
| 0.8239386283100748 | 0.2954971023993897 | 0.6653433174662532 | T | T | T |
| 0.9377352694847759 | 0.7514405574749300 | 0.7062638074101207 | T | T | T |
| 0.7219733190009684 | 0.8875649561399337 | 0.6364351632590638 | T | T | T |
| 0.3592861168860335 | 0.3542110473384208 | 0.8056481125471507 | T | T | T |
| 0.4007033417340247 | 0.4911964414674803 | 0.8354916038510034 | T | T | T |
| 0.0872918933927096 | 0.3491675735708455 | 0.3165761838479781 | F | F | F |
| 0.2210261891095229 | 0.8841047564380986 | 0.3364396356965571 | F | F | F |
| 0.3956958444457825 | 0.5826539194014728 | 0.4322333586466414 | F | F | F |
| 0.0293804831775972 | 0.1175219327103818 | 0.4520968104952274 | F | F | F |
| 0.2046348805971054 | 0.8187392974033481 | 0.5478107593013642 | T | T | T |
| 0.3389073606930887 | 0.3558100424341329 | 0.5696967195551753 | T | T | T |
| 0.0119450944397564 | 0.0493083659735797 | 0.6612671530664462 | T | T | T |
| 0.1496499448157536 | 0.5982641339778952 | 0.6830266356258636 | T | T | T |
| 0.5872297026015190 | 0.3491675735708455 | 0.3165761838479781 | F | F | F |
| 0.7209639983183322 | 0.8841047564380986 | 0.3364396356965571 | F | F | F |
| 0.8956336536545919 | 0.5826539194014728 | 0.4322333586466414 | F | F | F |
| 0.5293182923863995 | 0.1175219327103818 | 0.4520968104952274 | F | F | F |
| 0.7046484681793334 | 0.8186619521044066 | 0.5477846736992478 | T | T | T |
| 0.8389544019094359 | 0.3557800439984105 | 0.5697039123262614 | T | T | T |
| 0.5126765471285102 | 0.0494762653409311 | 0.6612135577006734 | T | T | T |
| 0.6492388444047472 | 0.5978857029480258 | 0.6830558522323776 | T | T | T |

**Figure 5 (b). O<sub>2</sub> Transition State on O<sub>5c</sub>/O<sub>3c</sub>**

|                    |                     |                    |                     |   |   |
|--------------------|---------------------|--------------------|---------------------|---|---|
| O                  | La                  |                    |                     |   |   |
|                    | 1.0000000000000000  |                    |                     |   |   |
|                    | 7.8789800000000003  | 0.0000000000000000 | 0.0000000000000000  |   |   |
|                    | -1.9697450000000001 | 7.0625114891995002 | 0.0000000000000000  |   |   |
|                    | 0.0000000000000000  | 0.0000000000000000 | 25.8263268595284998 |   |   |
| O                  | La                  |                    |                     |   |   |
|                    | 26                  | 16                 |                     |   |   |
| Selective dynamics |                     |                    |                     |   |   |
| Direct             |                     |                    |                     |   |   |
| 0.4041914058465323 | 0.6166361650044720  | 0.3264885496827432 | F                   | F | F |
| 0.0110088316484749 | 0.0440353265938924  | 0.3626144767290000 | F                   | F | F |
| 0.2973597212320982 | 0.1893094265467212  | 0.2904013428155352 | F                   | F | F |
| 0.2124952295362732 | 0.8499809181450858  | 0.4421844446604551 | F                   | F | F |
| 0.3193773845290409 | 0.2773800797345061  | 0.4782716515276633 | F                   | F | F |
| 0.1056635449218320 | 0.4226541796873349  | 0.4060585176142055 | F                   | F | F |
| 0.0223165726904202 | 0.0857859285055644  | 0.5622201437221732 | T                   | T | T |
| 0.1330430285029629 | 0.5206153378177351  | 0.5964629817852368 | T                   | T | T |

|                    |                    |                    |   |   |   |
|--------------------|--------------------|--------------------|---|---|---|
| 0.4142701969463777 | 0.6591018891541892 | 0.5213878396423378 | T | T | T |
| 0.3198619533481042 | 0.2844903370766440 | 0.6587706112514997 | T | T | T |
| 0.4507822467657283 | 0.7833699849280675 | 0.7128349028306241 | T | T | T |
| 0.2236780532713367 | 0.8914292347052963 | 0.6388209222524580 | T | T | T |
| 0.9041292150553417 | 0.6166361650044720 | 0.3264885496827432 | F | F | F |
| 0.5109466408572771 | 0.0440353265938924 | 0.3626144767290000 | F | F | F |
| 0.7972975304409076 | 0.1893094265467212 | 0.2904013428155352 | F | F | F |
| 0.7124330387450755 | 0.8499809181450858 | 0.4421844446604551 | F | F | F |
| 0.8193151937378502 | 0.2773800797345061 | 0.4782716515276633 | F | F | F |
| 0.6056013541306413 | 0.4226541796873349 | 0.4060585176142055 | F | F | F |
| 0.5216349379620241 | 0.0837745908696213 | 0.5615366987426177 | T | T | T |
| 0.6264389882056118 | 0.5181649582098004 | 0.5954499564269783 | T | T | T |
| 0.9158770236011028 | 0.6611869887591107 | 0.5221756643737219 | T | T | T |
| 0.8194030322093677 | 0.2944356521703580 | 0.6665379870066884 | T | T | T |
| 0.9379146772085111 | 0.7576059512399329 | 0.7090679005375555 | T | T | T |
| 0.7226342921120651 | 0.8873164658241147 | 0.6375021007287405 | T | T | T |
| 0.3139382039532883 | 0.2552074457560927 | 0.7143242016726882 | T | T | T |
| 0.3786170205553075 | 0.5065746656613168 | 0.7316723087161723 | T | T | T |
| 0.0872918933927096 | 0.3491675735708455 | 0.3165761838479781 | F | F | F |
| 0.2210261891095229 | 0.8841047564380986 | 0.3364396356965571 | F | F | F |
| 0.3956958444457825 | 0.5826539194014728 | 0.4322333586466413 | F | F | F |
| 0.0293804831775972 | 0.1175219327103818 | 0.4520968104952272 | F | F | F |
| 0.2050057221462847 | 0.8194228796667815 | 0.5499388095971219 | T | T | T |
| 0.3382196918733193 | 0.3564815027164018 | 0.5663444188059971 | T | T | T |
| 0.0061527734759855 | 0.0473761990080682 | 0.6643935583146403 | T | T | T |
| 0.1523122972366753 | 0.6078223065461804 | 0.6867272185845640 | T | T | T |
| 0.5872297026015190 | 0.3491675735708455 | 0.3165761838479781 | F | F | F |
| 0.7209639983183322 | 0.8841047564380986 | 0.3364396356965571 | F | F | F |
| 0.8956336536545919 | 0.5826539194014728 | 0.4322333586466413 | F | F | F |
| 0.5293182923863995 | 0.1175219327103818 | 0.4520968104952272 | F | F | F |
| 0.7043595590596150 | 0.8176389823247839 | 0.5484178445853581 | T | T | T |
| 0.8399405192651703 | 0.3569020522049509 | 0.5701521181856554 | T | T | T |
| 0.5212261128406880 | 0.0534993367367090 | 0.6639748976809111 | T | T | T |
| 0.6535390370186910 | 0.5992108355800939 | 0.6860923248482834 | T | T | T |

**Figure 5 (b). O<sub>2</sub> Chemisorption on O<sub>5c</sub>/O<sub>3c</sub>**

O La

1.0000000000000000

7.8789800000000003      0.0000000000000000      0.0000000000000000

-1.9697450000000001      7.0625114891995047      0.0000000000000000

0.0000000000000000      0.0000000000000000      25.8263268595284643

O La

26 16

Selective dynamics

Direct

|                    |                    |                    |   |   |   |
|--------------------|--------------------|--------------------|---|---|---|
| 0.4041914058465323 | 0.6166361650044720 | 0.3264885496827432 | F | F | F |
| 0.0110088316484749 | 0.0440353265938924 | 0.3626144767290000 | F | F | F |
| 0.2973597212320982 | 0.1893094265467212 | 0.2904013428155352 | F | F | F |
| 0.2124952295362732 | 0.8499809181450857 | 0.4421844446604553 | F | F | F |
| 0.3193773845290409 | 0.2773800797345061 | 0.4782716515276633 | F | F | F |
| 0.1056635449218319 | 0.4226541796873349 | 0.4060585176142055 | F | F | F |
| 0.0239454619378810 | 0.0782921025258686 | 0.5615633552100852 | T | T | T |
| 0.1274247048782464 | 0.5128284513626185 | 0.5980752894017156 | T | T | T |
| 0.4102101533620168 | 0.6585367274395943 | 0.5212923130789758 | T | T | T |
| 0.3432053531699767 | 0.3193004352805056 | 0.6654381747463863 | T | T | T |
| 0.4571681408352712 | 0.7937369506310304 | 0.7161360850251867 | T | T | T |

|                    |                    |                    |   |   |   |
|--------------------|--------------------|--------------------|---|---|---|
| 0.2317372871624053 | 0.8902771055794463 | 0.6378628887253844 | T | T | T |
| 0.9041292150553417 | 0.6166361650044720 | 0.3264885496827432 | F | F | F |
| 0.5109466408572771 | 0.0440353265938924 | 0.3626144767290000 | F | F | F |
| 0.7972975304409005 | 0.1893094265467212 | 0.2904013428155352 | F | F | F |
| 0.7124330387450755 | 0.8499809181450857 | 0.4421844446604553 | F | F | F |
| 0.8193151937378502 | 0.2773800797345061 | 0.4782716515276633 | F | F | F |
| 0.6056013541306413 | 0.4226541796873349 | 0.4060585176142055 | F | F | F |
| 0.5239974964960656 | 0.0838868785515826 | 0.5620953185545750 | T | T | T |
| 0.6206071385286926 | 0.5174087491927513 | 0.5942220996697908 | T | T | T |
| 0.9136697744020795 | 0.6584517544755971 | 0.5224672276086785 | T | T | T |
| 0.7889648261122005 | 0.3049652404376947 | 0.6655936089941746 | T | T | T |
| 0.9422981323444038 | 0.7417114707796959 | 0.7062977389058342 | T | T | T |
| 0.7190568354102990 | 0.8835446439084409 | 0.6371539031539367 | T | T | T |
| 0.2150690525484313 | 0.2712410068399548 | 0.7092389564357272 | T | T | T |
| 0.4191885253453577 | 0.6153345972611493 | 0.7456912438132132 | T | T | T |
| 0.0872918933927096 | 0.3491675735708455 | 0.3165761838479781 | F | F | F |
| 0.2210261891095229 | 0.8841047564380986 | 0.3364396356965571 | F | F | F |
| 0.3956958444457825 | 0.5826539194014728 | 0.4322333586466414 | F | F | F |
| 0.0293804831775972 | 0.1175219327103818 | 0.4520968104952274 | F | F | F |
| 0.2021967738908775 | 0.8163797481999890 | 0.5498114870224268 | T | T | T |
| 0.3341539864852250 | 0.3568710046754712 | 0.5668661317524784 | T | T | T |
| 0.0115528014910052 | 0.0336294906384354 | 0.6613181431807851 | T | T | T |
| 0.1614771768364434 | 0.5932167311845880 | 0.6895813054189165 | T | T | T |
| 0.5872297026015190 | 0.3491675735708455 | 0.3165761838479781 | F | F | F |
| 0.7209639983183322 | 0.8841047564380986 | 0.3364396356965571 | F | F | F |
| 0.8956336536545919 | 0.5826539194014728 | 0.4322333586466414 | F | F | F |
| 0.5293182923863995 | 0.1175219327103818 | 0.4520968104952274 | F | F | F |
| 0.7014177639827680 | 0.8161846787302721 | 0.5481174348280616 | T | T | T |
| 0.8355393130017600 | 0.3579126003688162 | 0.5703886539067933 | T | T | T |
| 0.5234448848174835 | 0.0562814074082417 | 0.6612589340822538 | T | T | T |
| 0.6564898731539248 | 0.5900495951174078 | 0.6860953661540069 | T | T | T |

**Table S6.** Optimized Fractional Coordinates for the O<sub>2</sub> Chemisorption States Shown in Figure 6.

**Figure 6. (001)**

|                     |                     |                    |                     |   |   |  |
|---------------------|---------------------|--------------------|---------------------|---|---|--|
| O La                |                     |                    |                     |   |   |  |
| 1.0000000000000000  |                     |                    |                     |   |   |  |
| 7.8789800000000003  | 0.0000000000000000  | 0.0000000000000000 | 0.0000000000000000  |   |   |  |
| -3.9394900000000002 | 6.8233968359095165  | 0.0000000000000000 | 0.0000000000000000  |   |   |  |
| 0.0000000000000000  | 0.0000000000000000  | 0.0000000000000000 | 25.5688315207999963 |   |   |  |
| O La                |                     |                    |                     |   |   |  |
| 25                  | 16                  |                    |                     |   |   |  |
| Selective dynamics  |                     |                    |                     |   |   |  |
| Direct              |                     |                    |                     |   |   |  |
| 0.4141692187218539  | 0.3283385295773833  | 0.7396739790751481 | T                   | T | T |  |
| 0.0000000000000000  | 0.0000000000000000  | 0.3790754283204265 | F                   | F | F |  |
| 0.16666666666666714 | 0.3333333333333286  | 0.2933258797492897 | F                   | F | F |  |
| 0.3333333333333286  | 0.16666666666666714 | 0.4648249768915562 | F                   | F | F |  |
| 0.0024907849388112  | 0.0037696784797863  | 0.6194766682073491 | T                   | T | T |  |
| 0.1653120435734066  | 0.3350594013180238  | 0.5348236247697372 | T                   | T | T |  |
| 0.3197036893272461  | 0.1394081266114968  | 0.7113863593353295 | T                   | T | T |  |
| 0.0000000000000000  | 0.5000000000000000  | 0.3790754283204265 | F                   | F | F |  |
| 0.16666666666666714 | 0.8333333333333357  | 0.2933258797492897 | F                   | F | F |  |
| 0.3333333333333357  | 0.66666666666666714 | 0.4648249768915562 | F                   | F | F |  |
| 0.0035456896523880  | 0.5070949244064072  | 0.6228159884886313 | T                   | T | T |  |
| 0.1651960058950865  | 0.8303921922811286  | 0.5355552048415761 | T                   | T | T |  |
| 0.3361218621303447  | 0.6751619024971566  | 0.7026609786321270 | T                   | T | T |  |
| 0.5000000000000000  | 0.0000000000000000  | 0.3790754283204265 | F                   | F | F |  |
| 0.66666666666666714 | 0.3333333333333286  | 0.2933258797492897 | F                   | F | F |  |
| 0.8333333333333286  | 0.16666666666666714 | 0.4648249768915562 | F                   | F | F |  |
| 0.5012782132215111  | 0.0037710483354451  | 0.6194763926345923 | T                   | T | T |  |
| 0.6697464072490040  | 0.3350591561511766  | 0.5348234289204110 | T                   | T | T |  |
| 0.8353746640426996  | 0.1707502092782166  | 0.7055209188114961 | T                   | T | T |  |
| 0.5000000000000000  | 0.5000000000000000  | 0.3790754283204265 | F                   | F | F |  |
| 0.66666666666666714 | 0.8333333333333357  | 0.2933258797492897 | F                   | F | F |  |
| 0.8333333333333286  | 0.66666666666666714 | 0.4648249768915562 | F                   | F | F |  |
| 0.4899789892477361  | 0.4799578837479528  | 0.6207897859220195 | T                   | T | T |  |
| 0.6660136788855295  | 0.8320283644762223  | 0.5355238312074382 | T                   | T | T |  |
| 0.8390389430451122  | 0.6751619319617593  | 0.7026614962217229 | T                   | T | T |  |
| 0.16666666666666714 | 0.3333333333333286  | 0.4389052786503242 | F                   | F | F |  |
| 0.3333333333333286  | 0.16666666666666714 | 0.3192455779905217 | F                   | F | F |  |
| 0.1717482302115272  | 0.3403148383034688  | 0.6828668342254185 | T                   | T | T |  |
| 0.3343839940905268  | 0.1687681566889489  | 0.5612782885711838 | T                   | T | T |  |
| 0.16666666666666714 | 0.8333333333333357  | 0.4389052786503242 | F                   | F | F |  |
| 0.3333333333333357  | 0.66666666666666714 | 0.3192455779905217 | F                   | F | F |  |
| 0.1602836202263209  | 0.8205691085362967  | 0.6757445607861525 | T                   | T | T |  |
| 0.3337820655613621  | 0.6662553603057546  | 0.5606813490330671 | T                   | T | T |  |
| 0.66666666666666714 | 0.3333333333333286  | 0.4389052786503242 | F                   | F | F |  |
| 0.8333333333333286  | 0.16666666666666714 | 0.3192455779905217 | F                   | F | F |  |
| 0.6685663220220242  | 0.3403150407923305  | 0.6828667734271688 | T                   | T | T |  |
| 0.8327163596865769  | 0.1654337574377546  | 0.5618516015039017 | T                   | T | T |  |
| 0.66666666666666714 | 0.8333333333333357  | 0.4389052786503242 | F                   | F | F |  |
| 0.8333333333333286  | 0.66666666666666714 | 0.3192455779905217 | F                   | F | F |  |
| 0.6700867818264707  | 0.8401738655807260  | 0.6828005158505046 | T                   | T | T |  |
| 0.8324724427964884  | 0.6662551081806780  | 0.5606812684118307 | T                   | T | T |  |

**Figure 6. (011)-I**

|                     |                    |                     |   |   |   |
|---------------------|--------------------|---------------------|---|---|---|
| O                   | La                 |                     |   |   |   |
| 1.0000000000000000  |                    |                     |   |   |   |
| 7.8789800000000003  | 0.0000000000000000 | 0.0000000000000000  |   |   |   |
| -1.9697450000000001 | 7.0625114891995047 | 0.0000000000000000  |   |   |   |
| 0.0000000000000000  | 0.0000000000000000 | 25.8263268595284643 |   |   |   |
| O                   | La                 |                     |   |   |   |
| 25                  | 16                 |                     |   |   |   |
| Selective dynamics  |                    |                     |   |   |   |
| Direct              |                    |                     |   |   |   |
| 0.2250311841715522  | 0.2898079831338705 | 0.7138847842176839  | T | T | T |
| 0.4041697660885788  | 0.6166790643543223 | 0.3265015826258235  | F | F | F |
| 0.0110175396903500  | 0.0440701587614001 | 0.3626018224361118  | F | F | F |
| 0.2973219924868076  | 0.1892879699472374 | 0.2904013428155352  | F | F | F |
| 0.2125092982657435  | 0.8500371930629598 | 0.4421671942086078  | F | F | F |
| 0.3193570718675147  | 0.2774282874700376 | 0.4782674340188962  | F | F | F |
| 0.1056615246639652  | 0.4226460986558749 | 0.4060669543983195  | F | F | F |
| 0.0243079952158200  | 0.0872813174718687 | 0.5603754691659287  | T | T | T |
| 0.1287273203215221  | 0.5171492446570057 | 0.5969751411957614  | T | T | T |
| 0.4106940941847147  | 0.6572720264183307 | 0.5214061867662593  | T | T | T |
| 0.3422074361081899  | 0.3209670371743377 | 0.6669413423554355  | T | T | T |
| 0.4460961204647600  | 0.7544676205771162 | 0.7067942113509592  | T | T | T |
| 0.2256899772460379  | 0.8977938585196090 | 0.6373240913282694  | T | T | T |
| 0.9041697660885788  | 0.6166790643543223 | 0.3265015826258235  | F | F | F |
| 0.5110175396903500  | 0.0440701587614001 | 0.3626018224361118  | F | F | F |
| 0.7973219924868076  | 0.1892879699472374 | 0.2904013428155352  | F | F | F |
| 0.7125092982657435  | 0.8500371930629598 | 0.4421671942086078  | F | F | F |
| 0.8193570718675147  | 0.2774282874700376 | 0.4782674340188962  | F | F | F |
| 0.6056615246639723  | 0.4226460986558749 | 0.4060669543983195  | F | F | F |
| 0.5226758723172047  | 0.0790686659450783 | 0.5610798160300280  | T | T | T |
| 0.6225991720658060  | 0.5149639699890812 | 0.5942709298548735  | T | T | T |
| 0.9146168958551666  | 0.6597749891485140 | 0.5220246528302941  | T | T | T |
| 0.8012058868968708  | 0.2924031194457339 | 0.6650592955758914  | T | T | T |
| 0.9397398260558411  | 0.7502245921202769 | 0.7072021062581665  | T | T | T |
| 0.7250295167483655  | 0.8833951008357426 | 0.6361462484753997  | T | T | T |
| 0.0873093305305090  | 0.3492373221220291 | 0.3165603160863029  | F | F | F |
| 0.2210302016466557  | 0.8841208065866084 | 0.3364428491653442  | F | F | F |
| 0.3956488627076666  | 0.5825954508306666 | 0.4322259276690872  | F | F | F |
| 0.0293697338238132  | 0.1174789352952530 | 0.4521084607481285  | F | F | F |
| 0.2028414843050396  | 0.8190069041191199 | 0.5493086548527446  | T | T | T |
| 0.3337489077545140  | 0.3555218625187579 | 0.5669820386629173  | T | T | T |
| 0.0112313305148585  | 0.0460631214008752 | 0.6638567109117063  | T | T | T |
| 0.1565392177067624  | 0.5984114916202340 | 0.6864092944402802  | T | T | T |
| 0.5873093305305019  | 0.3492373221220291 | 0.3165603160863029  | F | F | F |
| 0.7210302016466557  | 0.8841208065866084 | 0.3364428491653442  | F | F | F |
| 0.8956488627076666  | 0.5825954508306666 | 0.4322259276690872  | F | F | F |
| 0.5293697338238132  | 0.1174789352952530 | 0.4521084607481285  | F | F | F |
| 0.7023714856382136  | 0.8158615442761334 | 0.5474859213759630  | T | T | T |
| 0.8366099633725815  | 0.3532916327663594 | 0.5700288057125457  | T | T | T |
| 0.5205956830494373  | 0.0431147960930632 | 0.6620999122512381  | T | T | T |
| 0.6553316506530105  | 0.5940859042281182 | 0.6835018999311384  | T | T | T |

**Figure 6. (011)-II**

|                    |                    |                    |  |  |
|--------------------|--------------------|--------------------|--|--|
| O                  | La                 |                    |  |  |
| 1.0000000000000000 |                    |                    |  |  |
| 7.8789800000000003 | 0.0000000000000000 | 0.0000000000000000 |  |  |

|                       |                      |                      |   |   |   |
|-----------------------|----------------------|----------------------|---|---|---|
| -1.969745000000000001 | 7.0625114891995047   | 0.000000000000000000 |   |   |   |
| 0.000000000000000000  | 0.000000000000000000 | 25.8263268595284643  |   |   |   |
| O                     | La                   |                      |   |   |   |
| 25                    | 16                   |                      |   |   |   |
| Selective dynamics    |                      |                      |   |   |   |
| Direct                |                      |                      |   |   |   |
| 0.3054739409177753    | 0.2167533485744702   | 0.7130727935832181   | T | T | T |
| 0.4041697660885788    | 0.6166790643543223   | 0.3265015826258235   | F | F | F |
| 0.0110175396903500    | 0.0440701587614001   | 0.3626018224361118   | F | F | F |
| 0.2973219924868076    | 0.1892879699472374   | 0.2904013428155352   | F | F | F |
| 0.2125092982657435    | 0.8500371930629598   | 0.4421671942086078   | F | F | F |
| 0.3193570718675147    | 0.2774282874700376   | 0.4782674340188962   | F | F | F |
| 0.1056615246639652    | 0.4226460986558749   | 0.4060669543983195   | F | F | F |
| 0.0229565800731640    | 0.0869865317668215   | 0.5610258432401687   | T | T | T |
| 0.1311554893331585    | 0.5196389841786864   | 0.5950476035258861   | T | T | T |
| 0.4151930726480768    | 0.6592686686425638   | 0.5212585521257689   | T | T | T |
| 0.3279668873750614    | 0.3108486143737427   | 0.6614565997260150   | T | T | T |
| 0.4363727162686686    | 0.7445028624016744   | 0.7059752882476296   | T | T | T |
| 0.2208873971836291    | 0.8899895873171763   | 0.6368606350944872   | T | T | T |
| 0.9041697660885788    | 0.6166790643543223   | 0.3265015826258235   | F | F | F |
| 0.5110175396903500    | 0.0440701587614001   | 0.3626018224361118   | F | F | F |
| 0.7973219924868076    | 0.1892879699472374   | 0.2904013428155352   | F | F | F |
| 0.7125092982657435    | 0.8500371930629598   | 0.4421671942086078   | F | F | F |
| 0.8193570718675147    | 0.2774282874700376   | 0.4782674340188962   | F | F | F |
| 0.6056615246639723    | 0.4226460986558749   | 0.4060669543983195   | F | F | F |
| 0.5198508813573394    | 0.0847097840146259   | 0.5611833495725685   | T | T | T |
| 0.6284866547830739    | 0.5190942747162444   | 0.5949027109966359   | T | T | T |
| 0.9147436021908267    | 0.6606871842790623   | 0.5217163963105194   | T | T | T |
| 0.8240572697253289    | 0.2986030187333392   | 0.6663178145586309   | T | T | T |
| 0.9369095155352243    | 0.7491991515262620   | 0.7073264098546754   | T | T | T |
| 0.7232235698328527    | 0.8871295809028795   | 0.6379835954848336   | T | T | T |
| 0.0873093305305090    | 0.3492373221220291   | 0.3165603160863029   | F | F | F |
| 0.2210302016466557    | 0.8841208065866084   | 0.3364428491653442   | F | F | F |
| 0.3956488627076666    | 0.5825954508306666   | 0.4322259276690872   | F | F | F |
| 0.0293697338238132    | 0.1174789352952530   | 0.4521084607481285   | F | F | F |
| 0.2041927986000861    | 0.8187148169115198   | 0.5481930887237407   | T | T | T |
| 0.3383457573648394    | 0.3543548542822199   | 0.5665935520187072   | T | T | T |
| 0.0121019437030124    | 0.0475582324401294   | 0.6647803830992132   | T | T | T |
| 0.1467381375875399    | 0.5979061050660390   | 0.6836834484770455   | T | T | T |
| 0.5873093305305019    | 0.3492373221220291   | 0.3165603160863029   | F | F | F |
| 0.7210302016466557    | 0.8841208065866084   | 0.3364428491653442   | F | F | F |
| 0.8956488627076666    | 0.5825954508306666   | 0.4322259276690872   | F | F | F |
| 0.5293697338238132    | 0.1174789352952530   | 0.4521084607481285   | F | F | F |
| 0.7050102583329773    | 0.8183416698247348   | 0.5485715779279104   | T | T | T |
| 0.8383858638026260    | 0.3529015756009751   | 0.5701051918392327   | T | T | T |
| 0.5103843567357083    | 0.0438742180757489   | 0.6645045598697743   | T | T | T |
| 0.6514719506571399    | 0.5944906227736406   | 0.6836307058684099   | T | T | T |

**Figure 6. (011)-III**

|                      |                    |                     |  |  |
|----------------------|--------------------|---------------------|--|--|
| O                    | La                 |                     |  |  |
| 1.0000000000000000   |                    |                     |  |  |
| 7.87898000000000003  | 0.0000000000000000 | 0.0000000000000000  |  |  |
| -1.96974500000000001 | 7.0625114891995047 | 0.0000000000000000  |  |  |
| 0.00000000000000000  | 0.0000000000000000 | 25.8263268595284643 |  |  |
| O                    | La                 |                     |  |  |
| 25                   | 16                 |                     |  |  |



Selective dynamics

Direct

|                    |                    |                    |   |   |   |
|--------------------|--------------------|--------------------|---|---|---|
| 0.3054739409177753 | 0.2167533485744702 | 0.7130727935832181 | T | T | T |
| 0.4041697660885788 | 0.6166790643543223 | 0.3265015826258235 | F | F | F |
| 0.0110175396903500 | 0.0440701587614001 | 0.3626018224361118 | F | F | F |
| 0.2973219924868076 | 0.1892879699472374 | 0.2904013428155352 | F | F | F |
| 0.2125092982657435 | 0.8500371930629598 | 0.4421671942086078 | F | F | F |
| 0.3193570718675147 | 0.2774282874700376 | 0.4782674340188962 | F | F | F |
| 0.1056615246639652 | 0.4226460986558749 | 0.4060669543983195 | F | F | F |
| 0.0229565800731640 | 0.0869865317668215 | 0.5610258432401687 | T | T | T |
| 0.1311554893331585 | 0.5196389841786864 | 0.5950476035258861 | T | T | T |
| 0.4151930726480768 | 0.6592686686425638 | 0.5212585521257689 | T | T | T |
| 0.3279668873750614 | 0.3108486143737427 | 0.6614565997260150 | T | T | T |
| 0.4363727162686686 | 0.7445028624016744 | 0.7059752882476296 | T | T | T |
| 0.2208873971836291 | 0.8899895873171763 | 0.6368606350944872 | T | T | T |
| 0.9041697660885788 | 0.6166790643543223 | 0.3265015826258235 | F | F | F |
| 0.5110175396903500 | 0.0440701587614001 | 0.3626018224361118 | F | F | F |
| 0.7973219924868076 | 0.1892879699472374 | 0.2904013428155352 | F | F | F |
| 0.7125092982657435 | 0.8500371930629598 | 0.4421671942086078 | F | F | F |
| 0.8193570718675147 | 0.2774282874700376 | 0.4782674340188962 | F | F | F |
| 0.6056615246639723 | 0.4226460986558749 | 0.4060669543983195 | F | F | F |
| 0.5198508813573394 | 0.0847097840146259 | 0.5611833495725685 | T | T | T |
| 0.6284866547830739 | 0.5190942747162444 | 0.5949027109966359 | T | T | T |
| 0.9147436021908267 | 0.6606871842790623 | 0.5217163963105194 | T | T | T |
| 0.8240572697253289 | 0.2986030187333392 | 0.6663178145586309 | T | T | T |
| 0.9369095155352243 | 0.7491991515262620 | 0.7073264098546754 | T | T | T |
| 0.7232235698328527 | 0.8871295809028795 | 0.6379835954848336 | T | T | T |
| 0.0873093305305090 | 0.3492373221220291 | 0.3165603160863029 | F | F | F |
| 0.2210302016466557 | 0.8841208065866084 | 0.3364428491653442 | F | F | F |
| 0.3956488627076666 | 0.5825954508306666 | 0.4322259276690872 | F | F | F |
| 0.0293697338238132 | 0.1174789352952530 | 0.4521084607481285 | F | F | F |
| 0.2041927986000861 | 0.8187148169115198 | 0.5481930887237407 | T | T | T |
| 0.3383457573648394 | 0.3543548542822199 | 0.5665935520187072 | T | T | T |
| 0.0121019437030124 | 0.0475582324401294 | 0.6647803830992132 | T | T | T |
| 0.1467381375875399 | 0.5979061050660390 | 0.6836834484770455 | T | T | T |
| 0.5873093305305019 | 0.3492373221220291 | 0.3165603160863029 | F | F | F |
| 0.7210302016466557 | 0.8841208065866084 | 0.3364428491653442 | F | F | F |
| 0.8956488627076666 | 0.5825954508306666 | 0.4322259276690872 | F | F | F |
| 0.5293697338238132 | 0.1174789352952530 | 0.4521084607481285 | F | F | F |
| 0.7050102583329773 | 0.8183416698247348 | 0.5485715779279104 | T | T | T |
| 0.8383858638026260 | 0.3529015756009751 | 0.5701051918392327 | T | T | T |
| 0.5103843567357083 | 0.0438742180757489 | 0.6645045598697743 | T | T | T |
| 0.6514719506571399 | 0.5944906227736406 | 0.6836307058684099 | T | T | T |

**Figure 6. (011)-IV**

O La

|                     |                    |                     |
|---------------------|--------------------|---------------------|
| 1.0000000000000000  |                    |                     |
| 7.8789800000000003  | 0.0000000000000000 | 0.0000000000000000  |
| -1.9697450000000001 | 7.0625114891995047 | 0.0000000000000000  |
| 0.0000000000000000  | 0.0000000000000000 | 25.8263268595284643 |

O La  
25 16

Selective dynamics

Direct

|                    |                    |                    |   |   |   |
|--------------------|--------------------|--------------------|---|---|---|
| 0.3470656159174417 | 0.8533390290720843 | 0.7375627643216904 | T | T | T |
| 0.4041697660885788 | 0.6166790643543223 | 0.3265015826258235 | F | F | F |

|                    |                    |                    |   |   |   |
|--------------------|--------------------|--------------------|---|---|---|
| 0.0110175396903500 | 0.0440701587614001 | 0.3626018224361118 | F | F | F |
| 0.2973219924868076 | 0.1892879699472374 | 0.2904013428155352 | F | F | F |
| 0.2125092982657435 | 0.8500371930629598 | 0.4421671942086078 | F | F | F |
| 0.3193570718675147 | 0.2774282874700376 | 0.4782674340188962 | F | F | F |
| 0.1056615246639652 | 0.4226460986558749 | 0.4060669543983195 | F | F | F |
| 0.0221391414328926 | 0.0821896402480144 | 0.5638541052649665 | T | T | T |
| 0.1273915307930371 | 0.5153652069979264 | 0.5956852320078964 | T | T | T |
| 0.4152910029044437 | 0.6612186939650723 | 0.5213360455610627 | T | T | T |
| 0.3309023955495780 | 0.2896110059233085 | 0.6644571279923494 | T | T | T |
| 0.4504919845203785 | 0.7364360944919551 | 0.7124850437160825 | T | T | T |
| 0.2240316476536262 | 0.8824227482396355 | 0.6355577316913723 | T | T | T |
| 0.9041697660885788 | 0.6166790643543223 | 0.3265015826258235 | F | F | F |
| 0.5110175396903500 | 0.0440701587614001 | 0.3626018224361118 | F | F | F |
| 0.7973219924868076 | 0.1892879699472374 | 0.2904013428155352 | F | F | F |
| 0.7125092982657435 | 0.8500371930629598 | 0.4421671942086078 | F | F | F |
| 0.8193570718675147 | 0.2774282874700376 | 0.4782674340188962 | F | F | F |
| 0.6056615246639723 | 0.4226460986558749 | 0.4060669543983195 | F | F | F |
| 0.5215597289639383 | 0.0891754302124535 | 0.5607787331919165 | T | T | T |
| 0.6310650528138400 | 0.5253033351980414 | 0.5934524937593043 | T | T | T |
| 0.9147456815392141 | 0.6616631848533080 | 0.5214498735234759 | T | T | T |
| 0.8116656878831569 | 0.3251682911335977 | 0.6679089941620883 | T | T | T |
| 0.9371151825643361 | 0.7547596934782576 | 0.7043422790111716 | T | T | T |
| 0.7222102289763218 | 0.8951584868349627 | 0.6373752362535490 | T | T | T |
| 0.0873093305305090 | 0.3492373221220291 | 0.3165603160863029 | F | F | F |
| 0.2210302016466557 | 0.8841208065866084 | 0.3364428491653442 | F | F | F |
| 0.3956488627076666 | 0.5825954508306666 | 0.4322259276690872 | F | F | F |
| 0.0293697338238132 | 0.1174789352952530 | 0.4521084607481285 | F | F | F |
| 0.2049096218184346 | 0.8158968486145152 | 0.5474160217753246 | T | T | T |
| 0.3397707598594114 | 0.3547147954727447 | 0.5692084558346501 | T | T | T |
| 0.0177482694389121 | 0.0464463705834047 | 0.6601358867676758 | T | T | T |
| 0.1434579034204273 | 0.5993166389531633 | 0.6850552689644099 | T | T | T |
| 0.5873093305305019 | 0.3492373221220291 | 0.3165603160863029 | F | F | F |
| 0.7210302016466557 | 0.8841208065866084 | 0.3364428491653442 | F | F | F |
| 0.8956488627076666 | 0.5825954508306666 | 0.4322259276690872 | F | F | F |
| 0.5293697338238132 | 0.1174789352952530 | 0.4521084607481285 | F | F | F |
| 0.7040188393124575 | 0.8231369386717150 | 0.5481740401716343 | T | T | T |
| 0.8367618746873904 | 0.3565615144500894 | 0.5692833749438220 | T | T | T |
| 0.5070023756402149 | 0.0518927738868904 | 0.6653210532441476 | T | T | T |
| 0.6606429732372523 | 0.5861094327060971 | 0.6811416712246195 | T | T | T |

**Figure 6. (100)-I**

O La

1.0000000000000000

7.8789800000000003      0.0000000000000000      0.0000000000000000

0.0000000000000000      6.1837999999999997      0.0000000000000000

0.0000000000000000      0.0000000000000000      27.5095608658341177

O La

25 16

Selective dynamics

Direct

|                    |                    |                    |   |   |   |
|--------------------|--------------------|--------------------|---|---|---|
| 0.3750000000000000 | 0.2918565831222069 | 0.7411547560219336 | T | T | T |
| 0.3750000000000000 | 0.5000000000000000 | 0.3139720349630153 | F | F | F |
| 0.1250000000000000 | 0.1454420000000027 | 0.3553115827490103 | F | F | F |
| 0.1250000000000000 | 0.8545579999999973 | 0.2726324871770203 | F | F | F |
| 0.1250000000000000 | 0.5000000000000000 | 0.4379906783210075 | F | F | F |
| 0.3750000000000000 | 0.1454420000000027 | 0.4793302261070025 | F | F | F |

|                     |                     |                    |   |   |   |
|---------------------|---------------------|--------------------|---|---|---|
| 0.37500000000000000 | 0.85455799999999973 | 0.3966511305350124 | F | F | F |
| 0.37500000000000000 | 0.5125573012446264  | 0.5574951721448400 | T | T | T |
| 0.1311423095097144  | 0.1507742739362595  | 0.6076321616308622 | T | T | T |
| 0.1241582042655954  | 0.8617348935234332  | 0.5207319379209205 | T | T | T |
| 0.1170419136437306  | 0.5621752986852013  | 0.6856374847683665 | T | T | T |
| 0.37500000000000000 | 0.0561412508033619  | 0.7357491430241793 | T | T | T |
| 0.37500000000000000 | 0.8308576484254416  | 0.6449492791850321 | T | T | T |
| 0.87500000000000000 | 0.50000000000000000 | 0.3139720349630153 | F | F | F |
| 0.62500000000000000 | 0.14544200000000027 | 0.3553115827490103 | F | F | F |
| 0.62500000000000000 | 0.85455799999999973 | 0.2726324871770203 | F | F | F |
| 0.62500000000000000 | 0.50000000000000000 | 0.4379906783210075 | F | F | F |
| 0.87500000000000000 | 0.14544200000000027 | 0.4793302261070025 | F | F | F |
| 0.87500000000000000 | 0.85455799999999973 | 0.3966511305350124 | F | F | F |
| 0.87500000000000000 | 0.5036736549909400  | 0.5591105783916823 | T | T | T |
| 0.6188576904902854  | 0.1507742739362595  | 0.6076321616308622 | T | T | T |
| 0.6258417957344045  | 0.8617348935234332  | 0.5207319379209205 | T | T | T |
| 0.6329580863562692  | 0.5621752986852013  | 0.6856374847683665 | T | T | T |
| 0.87500000000000000 | 0.0818927433341074  | 0.7246195401655090 | T | T | T |
| 0.87500000000000000 | 0.8490622352189531  | 0.6395972643354564 | T | T | T |
| 0.12500000000000000 | 0.74738500000000013 | 0.3553115827490103 | F | F | F |
| 0.12500000000000000 | 0.25261499999999987 | 0.2726324871770203 | F | F | F |
| 0.37500000000000000 | 0.74738500000000013 | 0.4793302261070025 | F | F | F |
| 0.37500000000000000 | 0.25261499999999987 | 0.3966511305350124 | F | F | F |
| 0.1257164051010977  | 0.7331067308949040  | 0.6007613370184910 | T | T | T |
| 0.1252894455123432  | 0.2511611257056939  | 0.5211753381222455 | T | T | T |
| 0.37500000000000000 | 0.6730765509440679  | 0.7204352700487180 | T | T | T |
| 0.37500000000000000 | 0.2065643406541682  | 0.6533817904390280 | T | T | T |
| 0.62500000000000000 | 0.74738500000000013 | 0.3553115827490103 | F | F | F |
| 0.62500000000000000 | 0.25261499999999987 | 0.2726324871770203 | F | F | F |
| 0.87500000000000000 | 0.74738500000000013 | 0.4793302261070025 | F | F | F |
| 0.87500000000000000 | 0.25261499999999987 | 0.3966511305350124 | F | F | F |
| 0.6242835948989021  | 0.7331067308949040  | 0.6007613370184910 | T | T | T |
| 0.6247105544876568  | 0.2511611257056939  | 0.5211753381222455 | T | T | T |
| 0.87500000000000000 | 0.7387071766530082  | 0.7185525038521173 | T | T | T |
| 0.87500000000000000 | 0.2305813887933597  | 0.6507358835219251 | T | T | T |

**Figure 6. (100)-II**

O La

|                    |                    |                     |
|--------------------|--------------------|---------------------|
| 1.0000000000000000 |                    |                     |
| 7.8789800000000003 | 0.0000000000000000 | 0.0000000000000000  |
| 0.0000000000000000 | 6.1837999999999997 | 0.0000000000000000  |
| 0.0000000000000000 | 0.0000000000000000 | 27.5095608658341177 |

O La  
25 16

Selective dynamics

Direct

|                     |                     |                    |   |   |   |
|---------------------|---------------------|--------------------|---|---|---|
| 0.1249996664920867  | 0.5432356085623099  | 0.7453546221463226 | T | T | T |
| 0.37500000000000000 | 0.50000000000000000 | 0.3139720349630153 | F | F | F |
| 0.12500000000000000 | 0.14544200000000027 | 0.3553115827490103 | F | F | F |
| 0.12500000000000000 | 0.85455799999999973 | 0.2726324871770203 | F | F | F |
| 0.12500000000000000 | 0.50000000000000000 | 0.4379906783210075 | F | F | F |
| 0.37500000000000000 | 0.14544200000000027 | 0.4793302261070025 | F | F | F |
| 0.37500000000000000 | 0.85455799999999973 | 0.3966511305350124 | F | F | F |
| 0.3746228898523965  | 0.5120810768463727  | 0.5569412907637326 | T | T | T |
| 0.1249997001237652  | 0.1553750931808907  | 0.6086420319490604 | T | T | T |
| 0.1249999400149668  | 0.8647336006275800  | 0.5215751140204630 | T | T | T |

|                    |                    |                    |   |   |   |
|--------------------|--------------------|--------------------|---|---|---|
| 0.1249995440744254 | 0.5151721623786488 | 0.6908978233972338 | T | T | T |
| 0.3912018998780488 | 0.0656090453069013 | 0.7276847184760872 | T | T | T |
| 0.3700509036128277 | 0.8302017529007280 | 0.6427932502788805 | T | T | T |
| 0.8750000000000000 | 0.5000000000000000 | 0.3139720349630153 | F | F | F |
| 0.6250000000000000 | 0.1454420000000027 | 0.3553115827490103 | F | F | F |
| 0.6250000000000000 | 0.8545579999999973 | 0.2726324871770203 | F | F | F |
| 0.6250000000000000 | 0.5000000000000000 | 0.4379906783210075 | F | F | F |
| 0.8750000000000000 | 0.1454420000000027 | 0.4793302261070025 | F | F | F |
| 0.8750000000000000 | 0.8545579999999973 | 0.3966511305350124 | F | F | F |
| 0.8753763738998370 | 0.5120811327541894 | 0.5569413012478499 | T | T | T |
| 0.6249995755064062 | 0.1413297890522753 | 0.6077221187693703 | T | T | T |
| 0.6250000403990474 | 0.8607127552024366 | 0.5210228621096575 | T | T | T |
| 0.6249999837278331 | 0.5413428487828433 | 0.6870358001947674 | T | T | T |
| 0.8587977918549039 | 0.0656091154510754 | 0.7276847910023440 | T | T | T |
| 0.8799487406698120 | 0.8302018740384505 | 0.6427932303025733 | T | T | T |
| 0.1250000000000000 | 0.7473850000000013 | 0.3553115827490103 | F | F | F |
| 0.1250000000000000 | 0.2526149999999987 | 0.2726324871770203 | F | F | F |
| 0.3750000000000000 | 0.7473850000000013 | 0.4793302261070025 | F | F | F |
| 0.3750000000000000 | 0.2526149999999987 | 0.3966511305350124 | F | F | F |
| 0.1249995757599779 | 0.7380120322064738 | 0.5991132120756387 | T | T | T |
| 0.1250001976677288 | 0.2541814426823900 | 0.5217403969958119 | T | T | T |
| 0.3843535776603231 | 0.7235375002823415 | 0.7230176003486352 | T | T | T |
| 0.3794461766001302 | 0.2144587818799117 | 0.6544299681347735 | T | T | T |
| 0.6250000000000000 | 0.7473850000000013 | 0.3553115827490103 | F | F | F |
| 0.6250000000000000 | 0.2526149999999987 | 0.2726324871770203 | F | F | F |
| 0.8750000000000000 | 0.7473850000000013 | 0.4793302261070025 | F | F | F |
| 0.8750000000000000 | 0.2526149999999987 | 0.3966511305350124 | F | F | F |
| 0.6249997592283111 | 0.7297036343064663 | 0.6011488495221663 | T | T | T |
| 0.6250000625446632 | 0.2492251260942012 | 0.5213354789139740 | T | T | T |
| 0.8656461961449348 | 0.7235374793414576 | 0.7230177559858751 | T | T | T |
| 0.8705530704863752 | 0.2144590748528742 | 0.6544300246480366 | T | T | T |

**Figure 6. (100)-III**

O La

|                    |                    |                     |
|--------------------|--------------------|---------------------|
| 1.0000000000000000 |                    |                     |
| 7.8789800000000003 | 0.0000000000000000 | 0.0000000000000000  |
| 0.0000000000000000 | 6.1837999999999997 | 0.0000000000000000  |
| 0.0000000000000000 | 0.0000000000000000 | 27.5095608658341177 |

O La  
25 16

Selective dynamics

Direct

|                    |                     |                    |   |   |   |
|--------------------|---------------------|--------------------|---|---|---|
| 0.3712839228368057 | -0.0159347665440964 | 0.7754699669231729 | T | T | T |
| 0.3750000000000000 | 0.5000000000000000  | 0.3139720349630153 | F | F | F |
| 0.1250000000000000 | 0.1454420000000027  | 0.3553115827490103 | F | F | F |
| 0.1250000000000000 | 0.8545579999999973  | 0.2726324871770203 | F | F | F |
| 0.1250000000000000 | 0.5000000000000000  | 0.4379906783210075 | F | F | F |
| 0.3750000000000000 | 0.1454420000000027  | 0.4793302261070025 | F | F | F |
| 0.3750000000000000 | 0.8545579999999973  | 0.3966511305350124 | F | F | F |
| 0.3749911239907393 | 0.4985570360817034  | 0.5609626173383649 | T | T | T |
| 0.1246332992092210 | 0.1517339930511841  | 0.6073026888138541 | T | T | T |
| 0.1264629207571501 | 0.8603472280766735  | 0.5209172447808766 | T | T | T |
| 0.1232032641325329 | 0.5543784683278280  | 0.6872430038342437 | T | T | T |
| 0.3736878823449279 | 0.0960291583180095  | 0.7282113562866501 | T | T | T |
| 0.3751039442407691 | 0.8458358311118573  | 0.6413532486640855 | T | T | T |
| 0.8750000000000000 | 0.5000000000000000  | 0.3139720349630153 | F | F | F |

|                    |                    |                    |   |   |   |
|--------------------|--------------------|--------------------|---|---|---|
| 0.6250000000000000 | 0.1454420000000027 | 0.3553115827490103 | F | F | F |
| 0.6250000000000000 | 0.8545579999999973 | 0.2726324871770203 | F | F | F |
| 0.6250000000000000 | 0.5000000000000000 | 0.4379906783210075 | F | F | F |
| 0.8750000000000000 | 0.1454420000000027 | 0.4793302261070025 | F | F | F |
| 0.8750000000000000 | 0.8545579999999973 | 0.3966511305350124 | F | F | F |
| 0.8750183245226536 | 0.5103495231933859 | 0.5574279111176420 | T | T | T |
| 0.6253959207778961 | 0.1518127678154950 | 0.6073286995977467 | T | T | T |
| 0.6235452608322753 | 0.8603536008874859 | 0.5209465644221659 | T | T | T |
| 0.6272349243836508 | 0.5546485338534677 | 0.6873660194464624 | T | T | T |
| 0.8742719131922148 | 0.0694928185474641 | 0.7263084529444048 | T | T | T |
| 0.8751495497844997 | 0.8406411626863725 | 0.6415200973921333 | T | T | T |
| 0.1250000000000000 | 0.7473850000000013 | 0.3553115827490103 | F | F | F |
| 0.1250000000000000 | 0.2526149999999987 | 0.2726324871770203 | F | F | F |
| 0.3750000000000000 | 0.7473850000000013 | 0.4793302261070025 | F | F | F |
| 0.3750000000000000 | 0.2526149999999987 | 0.3966511305350124 | F | F | F |
| 0.1239425608695767 | 0.7334102380172243 | 0.6011024064138250 | T | T | T |
| 0.1244991448609503 | 0.2511223096577951 | 0.5211630606687452 | T | T | T |
| 0.3748118119964745 | 0.7139025986031567 | 0.7202534204890327 | T | T | T |
| 0.3748441100854890 | 0.2232964359104871 | 0.6488459248427946 | T | T | T |
| 0.6250000000000000 | 0.7473850000000013 | 0.3553115827490103 | F | F | F |
| 0.6250000000000000 | 0.2526149999999987 | 0.2726324871770203 | F | F | F |
| 0.8750000000000000 | 0.7473850000000013 | 0.4793302261070025 | F | F | F |
| 0.8750000000000000 | 0.2526149999999987 | 0.3966511305350124 | F | F | F |
| 0.6262323168894367 | 0.7334626452724875 | 0.6011410505974319 | T | T | T |
| 0.6254875441092305 | 0.2511242664234892 | 0.5211775027531488 | T | T | T |
| 0.8751680008558107 | 0.7271590473601250 | 0.7206623104703946 | T | T | T |
| 0.8749327173244110 | 0.2231903198253529 | 0.6534664396199252 | T | T | T |

**Figure 6. (110)-I**

O La

|                    |                    |                     |
|--------------------|--------------------|---------------------|
| 1.0000000000000000 |                    |                     |
| 6.8233968359095165 | 0.0000000000000000 | 0.0000000000000000  |
| 0.0000000000000000 | 6.1837999999999997 | 0.0000000000000000  |
| 0.0000000000000000 | 0.0000000000000000 | 24.8487250000000017 |

O La

19 12

Selective dynamics

Direct

|                     |                    |                    |   |   |   |
|---------------------|--------------------|--------------------|---|---|---|
| 0.4086274080959859  | 0.0326709792418299 | 0.7200049680498929 | T | T | T |
| 0.0000000000000000  | 0.5000000000000000 | 0.3018263512514210 | F | F | F |
| 0.3333333333333357  | 0.8545579999999973 | 0.3018263512514210 | F | F | F |
| 0.6666666666666643  | 0.1454420000000027 | 0.3018263512514210 | F | F | F |
| 0.5000000000000000  | 0.5000000000000000 | 0.3810958107508498 | F | F | F |
| 0.8333333333333357  | 0.8545579999999973 | 0.3810958107508498 | F | F | F |
| 0.1666666666666643  | 0.1454420000000027 | 0.3810958107508498 | F | F | F |
| 0.0000000000000000  | 0.5000000000000000 | 0.4603652702502856 | F | F | F |
| 0.3333333333333357  | 0.8545579999999973 | 0.4603652702502856 | F | F | F |
| 0.6666666666666643  | 0.1454420000000027 | 0.4603652702502856 | F | F | F |
| 0.49639382566254155 | 0.5088730662462578 | 0.5349674580936968 | T | T | T |
| 0.8334073266901347  | 0.8426885922215803 | 0.5406804081279527 | T | T | T |
| 0.1591735590517034  | 0.1476708651528449 | 0.5391806786257437 | T | T | T |
| -0.0341142197276698 | 0.4346752483226327 | 0.6369847838996254 | T | T | T |
| 0.2898712565614656  | 0.8352329820046444 | 0.6198275974862308 | T | T | T |
| 0.6355029088662836  | 0.1236236285674512 | 0.6148675033303160 | T | T | T |
| 0.4880923795288899  | 0.4855761709625802 | 0.6793048181508310 | T | T | T |
| 0.8541063440228855  | 0.8713274086374287 | 0.6922718873048734 | T | T | T |

|                    |                    |                    |   |   |   |
|--------------------|--------------------|--------------------|---|---|---|
| 0.2019809669871192 | 0.1158902544090154 | 0.7173730250553806 | T | T | T |
| 0.3333333333333357 | 0.2526149999999987 | 0.3018263512514210 | F | F | F |
| 0.6666666666666643 | 0.7473850000000013 | 0.3018263512514210 | F | F | F |
| 0.8333333333333357 | 0.2526149999999987 | 0.3810958107508498 | F | F | F |
| 0.1666666666666643 | 0.7473850000000013 | 0.3810958107508498 | F | F | F |
| 0.3333333333333357 | 0.2526149999999987 | 0.4603652702502856 | F | F | F |
| 0.6666666666666643 | 0.7473850000000013 | 0.4603652702502856 | F | F | F |
| 0.8229369977812101 | 0.2406061915857259 | 0.5407591797637902 | T | T | T |
| 0.1658677306779541 | 0.7436530304620274 | 0.5352390916557010 | T | T | T |
| 0.3004723012651684 | 0.2314398385396159 | 0.6261367174682401 | T | T | T |
| 0.6522038727459105 | 0.7338430319448639 | 0.6212104762078691 | T | T | T |
| 0.7527137782416071 | 0.2272689339906522 | 0.6957723181167870 | T | T | T |
| 0.1733777736835518 | 0.7380176534327967 | 0.6994212680182268 | T | T | T |

**Figure 6. (110)-II**

O La

|                    |                    |                     |
|--------------------|--------------------|---------------------|
| 1.000000000000000  |                    |                     |
| 6.8233968359095165 | 0.0000000000000000 | 0.0000000000000000  |
| 0.0000000000000000 | 6.1837999999999997 | 0.0000000000000000  |
| 0.0000000000000000 | 0.0000000000000000 | 24.8487250000000017 |

O La  
19 12

Selective dynamics

Direct

|                     |                    |                    |   |   |   |
|---------------------|--------------------|--------------------|---|---|---|
| 0.4869126581372896  | 0.3335151819696508 | 0.7218155956207974 | T | T | T |
| 0.0000000000000000  | 0.5000000000000000 | 0.3018263512514210 | F | F | F |
| 0.3333333333333357  | 0.8545579999999973 | 0.3018263512514210 | F | F | F |
| 0.6666666666666643  | 0.1454420000000027 | 0.3018263512514210 | F | F | F |
| 0.5000000000000000  | 0.5000000000000000 | 0.3810958107508498 | F | F | F |
| 0.8333333333333357  | 0.8545579999999973 | 0.3810958107508498 | F | F | F |
| 0.1666666666666643  | 0.1454420000000027 | 0.3810958107508498 | F | F | F |
| 0.0000000000000000  | 0.5000000000000000 | 0.4603652702502856 | F | F | F |
| 0.3333333333333357  | 0.8545579999999973 | 0.4603652702502856 | F | F | F |
| 0.6666666666666643  | 0.1454420000000027 | 0.4603652702502856 | F | F | F |
| 0.5064682526254849  | 0.5158766010547289 | 0.5354176176527241 | T | T | T |
| 0.8407485830243472  | 0.8550634399282812 | 0.5389351169077076 | T | T | T |
| 0.1691142702737600  | 0.1507857134848667 | 0.5406430927166590 | T | T | T |
| -0.0076944475132507 | 0.5008886303043504 | 0.6260598215348928 | T | T | T |
| 0.3206312469091068  | 0.8474760292667378 | 0.6206510731537268 | T | T | T |
| 0.6612242705038117  | 0.1402978824627842 | 0.6161280631170352 | T | T | T |
| 0.4882557194453225  | 0.5168169718511495 | 0.6833463525265746 | T | T | T |
| 0.8207668426967373  | 0.8507931483105529 | 0.6973313940724922 | T | T | T |
| 0.1330206464537658  | 0.1163193756106390 | 0.6975662506070422 | T | T | T |
| 0.3333333333333357  | 0.2526149999999987 | 0.3018263512514210 | F | F | F |
| 0.6666666666666643  | 0.7473850000000013 | 0.3018263512514210 | F | F | F |
| 0.8333333333333357  | 0.2526149999999987 | 0.3810958107508498 | F | F | F |
| 0.1666666666666643  | 0.7473850000000013 | 0.3810958107508498 | F | F | F |
| 0.3333333333333357  | 0.2526149999999987 | 0.4603652702502856 | F | F | F |
| 0.6666666666666643  | 0.7473850000000013 | 0.4603652702502856 | F | F | F |
| 0.8339149841591355  | 0.2505722697101256 | 0.5380369619583031 | T | T | T |
| 0.1718881269527541  | 0.7469707897973112 | 0.5382270310713481 | T | T | T |
| 0.3193981813373382  | 0.2414359227639438 | 0.6262655307919737 | T | T | T |
| 0.6657052007600915  | 0.7436118629786426 | 0.6175323917367479 | T | T | T |
| 0.8110564564541026  | 0.2289300327729001 | 0.6948540863989290 | T | T | T |
| 0.1434910142776041  | 0.7529965243021063 | 0.6946622541958016 | T | T | T |

**Figure 6. (110)-III**

O La  
1.0000000000000000  
6.8233968359095165 0.0000000000000000 0.0000000000000000  
0.0000000000000000 6.1837999999999997 0.0000000000000000  
0.0000000000000000 0.0000000000000000 24.8487250000000017

O La  
19 12  
Selective dynamics  
Direct

|                     |                    |                    |   |   |   |
|---------------------|--------------------|--------------------|---|---|---|
| 0.0958597534804358  | 0.1233096744298352 | 0.7581592289399681 | T | T | T |
| 0.0000000000000000  | 0.5000000000000000 | 0.3018263512514210 | F | F | F |
| 0.3333333333333357  | 0.8545579999999973 | 0.3018263512514210 | F | F | F |
| 0.6666666666666643  | 0.1454420000000027 | 0.3018263512514210 | F | F | F |
| 0.5000000000000000  | 0.5000000000000000 | 0.3810958107508498 | F | F | F |
| 0.8333333333333357  | 0.8545579999999973 | 0.3810958107508498 | F | F | F |
| 0.1666666666666643  | 0.1454420000000027 | 0.3810958107508498 | F | F | F |
| 0.0000000000000000  | 0.5000000000000000 | 0.4603652702502856 | F | F | F |
| 0.3333333333333357  | 0.8545579999999973 | 0.4603652702502856 | F | F | F |
| 0.6666666666666643  | 0.1454420000000027 | 0.4603652702502856 | F | F | F |
| 0.4875581986349503  | 0.5057090031047560 | 0.5412854513884932 | T | T | T |
| 0.8389855896428066  | 0.8479660761707452 | 0.5381596322278028 | T | T | T |
| 0.1707190065142516  | 0.1430162238519766 | 0.5390043106825396 | T | T | T |
| -0.0156932979684754 | 0.4602110929785110 | 0.6207184489900968 | T | T | T |
| 0.3113632432007416  | 0.8616486250174504 | 0.6257763340567787 | T | T | T |
| 0.6591240088759748  | 0.1309386221269432 | 0.6151464684917896 | T | T | T |
| 0.5385406447666888  | 0.4791230357945092 | 0.6798011589363533 | T | T | T |
| 0.8629710865736053  | 0.8660619985686424 | 0.6896031280631718 | T | T | T |
| 0.1811391519805791  | 0.1821317329667101 | 0.7053632103205189 | T | T | T |
| 0.3333333333333357  | 0.2526149999999987 | 0.3018263512514210 | F | F | F |
| 0.6666666666666643  | 0.7473850000000013 | 0.3018263512514210 | F | F | F |
| 0.8333333333333357  | 0.2526149999999987 | 0.3810958107508498 | F | F | F |
| 0.1666666666666643  | 0.7473850000000013 | 0.3810958107508498 | F | F | F |
| 0.3333333333333357  | 0.2526149999999987 | 0.4603652702502856 | F | F | F |
| 0.6666666666666643  | 0.7473850000000013 | 0.4603652702502856 | F | F | F |
| 0.8381215287108197  | 0.2484240864916723 | 0.5391032103660396 | T | T | T |
| 0.1696765795178393  | 0.7530515950026732 | 0.5396768868800380 | T | T | T |
| 0.3352802691210155  | 0.2691595121044268 | 0.6200795991235994 | T | T | T |
| 0.6627007498323830  | 0.7441150728551961 | 0.6191591237816459 | T | T | T |
| 0.8216176271989992  | 0.2566896716940147 | 0.6908517634498613 | T | T | T |
| 0.1671827656321794  | 0.7954136022292692 | 0.7052437558984863 | T | T | T |

**Figure 6. (110)-IV**

O La  
1.0000000000000000  
6.8233968359095165 0.0000000000000000 0.0000000000000000  
0.0000000000000000 6.1837999999999997 0.0000000000000000  
0.0000000000000000 0.0000000000000000 24.8487250000000017

O La  
19 12  
Selective dynamics  
Direct

|                    |                    |                    |   |   |   |
|--------------------|--------------------|--------------------|---|---|---|
| 0.4999662998361117 | 0.4998366839023096 | 0.7389462725873350 | T | T | T |
| 0.0000000000000000 | 0.5000000000000000 | 0.3018263512514210 | F | F | F |
| 0.3333333333333357 | 0.8545579999999973 | 0.3018263512514210 | F | F | F |
| 0.6666666666666643 | 0.1454420000000027 | 0.3018263512514210 | F | F | F |

|                    |                    |                    |   |   |   |
|--------------------|--------------------|--------------------|---|---|---|
| 0.5000000000000000 | 0.5000000000000000 | 0.3810958107508498 | F | F | F |
| 0.8333333333333357 | 0.8545579999999973 | 0.3810958107508498 | F | F | F |
| 0.1666666666666643 | 0.1454420000000027 | 0.3810958107508498 | F | F | F |
| 0.0000000000000000 | 0.5000000000000000 | 0.4603652702502856 | F | F | F |
| 0.3333333333333357 | 0.8545579999999973 | 0.4603652702502856 | F | F | F |
| 0.6666666666666643 | 0.1454420000000027 | 0.4603652702502856 | F | F | F |
| 0.5000056027446061 | 0.5000042328827382 | 0.5362155457175830 | T | T | T |
| 0.8375621520710925 | 0.8527203570235780 | 0.5391901942141590 | T | T | T |
| 0.1624461199107463 | 0.1472937955127217 | 0.5391927798448948 | T | T | T |
| 0.0000078083203199 | 0.5000078929695156 | 0.6271985858921564 | T | T | T |
| 0.3287747431075737 | 0.8570665423056558 | 0.6196184142919454 | T | T | T |
| 0.6712172799357481 | 0.1429340155006978 | 0.6196210211658735 | T | T | T |
| 0.5000015589661094 | 0.5000598706529344 | 0.6791859291772320 | T | T | T |
| 0.8451332103448217 | 0.8646587248293367 | 0.6984011122654821 | T | T | T |
| 0.1548270766192287 | 0.1353073502591278 | 0.6983960332028223 | T | T | T |
| 0.3333333333333357 | 0.2526149999999987 | 0.3018263512514210 | F | F | F |
| 0.6666666666666643 | 0.7473850000000013 | 0.3018263512514210 | F | F | F |
| 0.8333333333333357 | 0.2526149999999987 | 0.3810958107508498 | F | F | F |
| 0.1666666666666643 | 0.7473850000000013 | 0.3810958107508498 | F | F | F |
| 0.3333333333333357 | 0.2526149999999987 | 0.4603652702502856 | F | F | F |
| 0.6666666666666643 | 0.7473850000000013 | 0.4603652702502856 | F | F | F |
| 0.8287147210112967 | 0.2516465199209841 | 0.5385103673351120 | T | T | T |
| 0.1712870597501242 | 0.7483520401425067 | 0.5385099814995523 | T | T | T |
| 0.3205133537677726 | 0.2477719699930189 | 0.6212337135684308 | T | T | T |
| 0.6794769538271077 | 0.7522220315392112 | 0.6212288175577234 | T | T | T |
| 0.8250096478640885 | 0.2391598489742209 | 0.6974523644977751 | T | T | T |
| 0.1749561182902434 | 0.7608164987941136 | 0.6974465017779771 | T | T | T |

**Figure 6. (101)-I**

O La

|                    |                    |                     |
|--------------------|--------------------|---------------------|
| 1.0000000000000000 |                    |                     |
| 7.3320504567344598 | 0.0000000000000000 | 0.0000000000000000  |
| 2.1166768493587393 | 7.5893349481880668 | 0.0000000000000000  |
| 0.0000000000000000 | 0.0000000000000000 | 26.4666250656236741 |

O La

25 16

Selective dynamics

Direct

|                    |                    |                    |   |   |   |
|--------------------|--------------------|--------------------|---|---|---|
| 0.2673930133172473 | 0.1889732782192791 | 0.7106141470086581 | T | T | T |
| 0.6166790643543223 | 0.0958302339114212 | 0.3306989717953783 | F | F | F |
| 0.9662841158585209 | 0.2584289710353715 | 0.3283033998687301 | F | F | F |
| 0.2670740128501166 | 0.4332314967874709 | 0.3330945437220194 | F | F | F |
| 0.8500371930629598 | 0.2874907017342565 | 0.4435663239317904 | F | F | F |
| 0.1996422445671584 | 0.4500894388582140 | 0.4411707520051493 | F | F | F |
| 0.5004321415587540 | 0.1248919646103062 | 0.4459618958584386 | F | F | F |
| 0.0967894657056954 | 0.4839910110861049 | 0.5588646104053022 | T | T | T |
| 0.4378411641764930 | 0.1415933093427112 | 0.5512082578646137 | T | T | T |
| 0.7465510475282455 | 0.3138684322815693 | 0.5628972335677664 | T | T | T |
| 0.3163708650831000 | 0.1732531116429560 | 0.6554489572444687 | T | T | T |
| 0.6246699655049616 | 0.3416129951475878 | 0.6722293706236985 | T | T | T |
| 0.9044193020072936 | 0.0209118332573711 | 0.6752113743906013 | T | T | T |
| 0.6166790643543223 | 0.5958302339114212 | 0.3306989717953783 | F | F | F |
| 0.9662841158585209 | 0.7584289710353715 | 0.3283033998687301 | F | F | F |
| 0.2670740128501166 | 0.9332314967874709 | 0.3330945437220194 | F | F | F |
| 0.8500371930629598 | 0.7874907017342565 | 0.4435663239317904 | F | F | F |
| 0.1996422445671584 | 0.9500894388582140 | 0.4411707520051493 | F | F | F |



|                    |                    |                    |   |   |   |
|--------------------|--------------------|--------------------|---|---|---|
| 0.5004321415587540 | 0.6248919646103133 | 0.4459618958584386 | F | F | F |
| 0.0973378796793464 | 0.9680209602327183 | 0.5564872581044127 | T | T | T |
| 0.4464785581991787 | 0.6379958818166348 | 0.5486786740912439 | T | T | T |
| 0.7399566281880613 | 0.8152329042304374 | 0.5617721447301477 | T | T | T |
| 0.3257645624542305 | 0.6673359026260383 | 0.6540333842912943 | T | T | T |
| 0.6186632021290173 | 0.8487088047229802 | 0.6709079253531739 | T | T | T |
| 0.8841571482116830 | 0.5331779859196089 | 0.6760412458619317 | T | T | T |
| 0.2714512792191499 | 0.1821371801952125 | 0.2833757602793625 | F | F | F |
| 0.9619068494894876 | 0.0095232876276299 | 0.3780221833113870 | F | F | F |
| 0.5048094079277874 | 0.3737976480180549 | 0.3962431124157817 | F | F | F |
| 0.1952649781981322 | 0.2011837554504723 | 0.4908895354477991 | F | F | F |
| 0.7418765354899185 | 0.0651169796506724 | 0.5105483870739199 | T | T | T |
| 0.4149931278840827 | 0.4023520762405837 | 0.5978664165869145 | T | T | T |
| 0.9558614960155967 | 0.2639275265863585 | 0.6344689947258094 | T | T | T |
| 0.6049252604414282 | 0.0976528046517828 | 0.7101543013227585 | T | T | T |
| 0.2714512792191499 | 0.6821371801952125 | 0.2833757602793625 | F | F | F |
| 0.9619068494894876 | 0.5095232876276299 | 0.3780221833113870 | F | F | F |
| 0.5048094079277874 | 0.8737976480180549 | 0.3962431124157817 | F | F | F |
| 0.1952649781981322 | 0.7011837554504723 | 0.4908895354477991 | F | F | F |
| 0.7452800126795768 | 0.5638070812036046 | 0.5092894836799131 | T | T | T |
| 0.4110920082778213 | 0.8918071560229970 | 0.5974901102029727 | T | T | T |
| 0.9589790542429337 | 0.7588971944780531 | 0.6298076108686359 | T | T | T |
| 0.5794771480542980 | 0.6069554991475891 | 0.7061610763144841 | T | T | T |

**Figure 6. (101)-II**

O La

1.0000000000000000

7.3320504567344598 0.0000000000000000 0.0000000000000000

2.1166768493587393 7.5893349481880668 0.0000000000000000

0.0000000000000000 0.0000000000000000 26.4666250656236741

O La

25 16

Selective dynamics

Direct

|                    |                    |                    |   |   |   |
|--------------------|--------------------|--------------------|---|---|---|
| 0.9125233386058604 | 0.1223977562280547 | 0.7268741109109584 | T | T | T |
| 0.6166790643543223 | 0.0958302339114212 | 0.3306989717953783 | F | F | F |
| 0.9662841158585209 | 0.2584289710353715 | 0.3283033998687301 | F | F | F |
| 0.2670740128501166 | 0.4332314967874709 | 0.3330945437220194 | F | F | F |
| 0.8500371930629598 | 0.2874907017342565 | 0.4435663239317904 | F | F | F |
| 0.1996422445671584 | 0.4500894388582140 | 0.4411707520051493 | F | F | F |
| 0.5004321415587540 | 0.1248919646103062 | 0.4459618958584386 | F | F | F |
| 0.0877954687941670 | 0.4964036630136237 | 0.5633762037689094 | T | T | T |
| 0.4377612968205202 | 0.1421971483290373 | 0.5487928252001951 | T | T | T |
| 0.7535896785825296 | 0.3108167575897433 | 0.5628886757812890 | T | T | T |
| 0.3174678154666363 | 0.1738945243123900 | 0.6554667618102993 | T | T | T |
| 0.6244138331032423 | 0.3412486332424409 | 0.6688466294480055 | T | T | T |
| 0.9086933544170260 | 0.0090446814899363 | 0.6818973286864372 | T | T | T |
| 0.6166790643543223 | 0.5958302339114212 | 0.3306989717953783 | F | F | F |
| 0.9662841158585209 | 0.7584289710353715 | 0.3283033998687301 | F | F | F |
| 0.2670740128501166 | 0.9332314967874709 | 0.3330945437220194 | F | F | F |
| 0.8500371930629598 | 0.7874907017342565 | 0.4435663239317904 | F | F | F |
| 0.1996422445671584 | 0.9500894388582140 | 0.4411707520051493 | F | F | F |
| 0.5004321415587540 | 0.6248919646103133 | 0.4459618958584386 | F | F | F |
| 0.0944599419172203 | 0.9629897988962782 | 0.5591393816107157 | T | T | T |
| 0.4443095143171161 | 0.6386710405098877 | 0.5489006474313164 | T | T | T |
| 0.7382878402929993 | 0.8172943302633257 | 0.5624634546190292 | T | T | T |

|                    |                    |                    |   |   |   |
|--------------------|--------------------|--------------------|---|---|---|
| 0.3286839583350268 | 0.6676064152401457 | 0.6552580960615298 | T | T | T |
| 0.6227250711811179 | 0.8493664842849358 | 0.6719505511684963 | T | T | T |
| 0.8937512671309312 | 0.5315975765335883 | 0.6752350851883460 | T | T | T |
| 0.2714512792191499 | 0.1821371801952125 | 0.2833757602793625 | F | F | F |
| 0.9619068494894876 | 0.0095232876276299 | 0.3780221833113870 | F | F | F |
| 0.5048094079277874 | 0.3737976480180549 | 0.3962431124157817 | F | F | F |
| 0.1952649781981322 | 0.2011837554504723 | 0.4908895354477991 | F | F | F |
| 0.7424670931223172 | 0.0659699808443631 | 0.5106200194187475 | T | T | T |
| 0.4152013357232898 | 0.3968340824995222 | 0.5985884673289620 | T | T | T |
| 0.9670226119762471 | 0.2616208839249872 | 0.6370068686517908 | T | T | T |
| 0.5826242381192455 | 0.1081411512672380 | 0.7087351775669808 | T | T | T |
| 0.2714512792191499 | 0.6821371801952125 | 0.2833757602793625 | F | F | F |
| 0.9619068494894876 | 0.5095232876276299 | 0.3780221833113870 | F | F | F |
| 0.5048094079277874 | 0.8737976480180549 | 0.3962431124157817 | F | F | F |
| 0.1952649781981322 | 0.7011837554504723 | 0.4908895354477991 | F | F | F |
| 0.7413104902205245 | 0.5640291829363432 | 0.5106133200512886 | T | T | T |
| 0.4101020462633431 | 0.8980789319973517 | 0.5992199391262485 | T | T | T |
| 0.9674898897315477 | 0.7492831978297296 | 0.6265622254219007 | T | T | T |
| 0.5909220180152194 | 0.6021903083128834 | 0.7054078354568535 | T | T | T |

**Figure 6. (101)-III**

O La

|                    |                    |                     |
|--------------------|--------------------|---------------------|
| 1.0000000000000000 |                    |                     |
| 7.3320504567344598 | 0.0000000000000000 | 0.0000000000000000  |
| 2.1166768493587393 | 7.5893349481880668 | 0.0000000000000000  |
| 0.0000000000000000 | 0.0000000000000000 | 26.4666250656236741 |

O La

25 16

Selective dynamics

Direct

|                    |                    |                    |   |   |   |
|--------------------|--------------------|--------------------|---|---|---|
| 0.6784160650619623 | 0.3310943952024920 | 0.7403706025567740 | T | T | T |
| 0.6166790643543223 | 0.0958302339114212 | 0.3306989717953783 | F | F | F |
| 0.9662841158585209 | 0.2584289710353715 | 0.3283033998687301 | F | F | F |
| 0.2670740128501166 | 0.4332314967874709 | 0.3330945437220194 | F | F | F |
| 0.8500371930629598 | 0.2874907017342565 | 0.4435663239317904 | F | F | F |
| 0.1996422445671584 | 0.4500894388582140 | 0.4411707520051493 | F | F | F |
| 0.5004321415587540 | 0.1248919646103062 | 0.4459618958584386 | F | F | F |
| 0.1044668538936006 | 0.4751566928227297 | 0.5602048058343996 | T | T | T |
| 0.4417120139350189 | 0.1435493515914831 | 0.5495968072644128 | T | T | T |
| 0.7438385873931282 | 0.3148644407669280 | 0.5677786507158862 | T | T | T |
| 0.3269379487288395 | 0.1700823316315101 | 0.6570452040027343 | T | T | T |
| 0.6380119753954836 | 0.3407343315233501 | 0.6840149619736003 | T | T | T |
| 0.8930564603667344 | 0.0230943156923009 | 0.6750059421388985 | T | T | T |
| 0.6166790643543223 | 0.5958302339114212 | 0.3306989717953783 | F | F | F |
| 0.9662841158585209 | 0.7584289710353715 | 0.3283033998687301 | F | F | F |
| 0.2670740128501166 | 0.9332314967874709 | 0.3330945437220194 | F | F | F |
| 0.8500371930629598 | 0.7874907017342565 | 0.4435663239317904 | F | F | F |
| 0.1996422445671584 | 0.9500894388582140 | 0.4411707520051493 | F | F | F |
| 0.5004321415587540 | 0.6248919646103133 | 0.4459618958584386 | F | F | F |
| 0.0958781070611767 | 0.9736188029287070 | 0.5569036854631672 | T | T | T |
| 0.4425737917677183 | 0.6349624968251439 | 0.5492285106152458 | T | T | T |
| 0.7429953147077596 | 0.8130749384727612 | 0.5591713643612575 | T | T | T |
| 0.3318730791416010 | 0.6658158607086493 | 0.6562049860796946 | T | T | T |
| 0.6303310626808929 | 0.8438142286975933 | 0.6640224385606662 | T | T | T |
| 0.8907801548132780 | 0.5319625398440680 | 0.6745443590079101 | T | T | T |
| 0.2714512792191499 | 0.1821371801952125 | 0.2833757602793625 | F | F | F |

|                    |                    |                    |   |   |   |
|--------------------|--------------------|--------------------|---|---|---|
| 0.9619068494894876 | 0.0095232876276299 | 0.3780221833113870 | F | F | F |
| 0.5048094079277874 | 0.3737976480180549 | 0.3962431124157817 | F | F | F |
| 0.1952649781981322 | 0.2011837554504723 | 0.4908895354477991 | F | F | F |
| 0.7421585401189010 | 0.0666605119235860 | 0.5103847009535295 | T | T | T |
| 0.4095394479168951 | 0.3983915047365169 | 0.6000241447879231 | T | T | T |
| 0.9698071214249422 | 0.2588163929248911 | 0.6351005836666851 | T | T | T |
| 0.5847119264352546 | 0.0844500193290257 | 0.7089120349623299 | T | T | T |
| 0.2714512792191499 | 0.6821371801952125 | 0.2833757602793625 | F | F | F |
| 0.9619068494894876 | 0.5095232876276299 | 0.3780221833113870 | F | F | F |
| 0.5048094079277874 | 0.8737976480180549 | 0.3962431124157817 | F | F | F |
| 0.1952649781981322 | 0.7011837554504723 | 0.4908895354477991 | F | F | F |
| 0.7405800047523464 | 0.5622228784232646 | 0.5099227830528734 | T | T | T |
| 0.4108298902132257 | 0.8963918596055592 | 0.5962833853419038 | T | T | T |
| 0.9577615064291176 | 0.7607123077994773 | 0.6289699717901819 | T | T | T |
| 0.5825087045954578 | 0.6248579146818596 | 0.7086542337250927 | T | T | T |

**Figure 6. (111)-I**

O La

|                     |                    |                     |
|---------------------|--------------------|---------------------|
| 1.0000000000000000  |                    |                     |
| 6.8234000000000004  | 0.0000000000000000 | 0.0000000000000000  |
| -3.4117236276940459 | 6.4899793757942073 | 0.0000000000000000  |
| 0.0000000000000016  | 0.0000000000000026 | 25.7149999999999999 |

La O

12 19

Selective dynamics

Direct

|                    |                    |                    |   |   |   |
|--------------------|--------------------|--------------------|---|---|---|
| 0.9219846346797027 | 0.2553166819266224 | 0.0439432237993387 | F | F | F |
| 0.4681585665774435 | 0.3474587312881923 | 0.1169356406766511 | F | F | F |
| 0.0141859439715617 | 0.4396007806497622 | 0.1898891697452854 | F | F | F |
| 0.5431503487639271 | 0.5263888725204960 | 0.2661457388916249 | T | T | T |
| 0.0461466288655999 | 0.5623878927803148 | 0.3558414976711930 | T | T | T |
| 0.6343787976193754 | 0.7834507813771718 | 0.3988497980842702 | T | T | T |
| 0.4800332923790691 | 0.7044706516406336 | 0.0078164495430713 | F | F | F |
| 0.0260606697731873 | 0.7966127010022035 | 0.0808088664203765 | F | F | F |
| 0.5721759798694777 | 0.8887547503637734 | 0.1538012832976889 | F | F | F |
| 0.1091930311288729 | 0.9727194043952589 | 0.2232683746832994 | T | T | T |
| 0.6446540073055537 | 0.0660264530846362 | 0.2944918342216074 | T | T | T |
| 0.1937497704977862 | 0.1187934446188914 | 0.3702689086836861 | T | T | T |
| 0.7009704423389636 | 0.4798166249363334 | 0.0258603927668659 | F | F | F |
| 0.2469978197330818 | 0.5719586742979033 | 0.0988528096441783 | F | F | F |
| 0.7931131298293721 | 0.6641007236594731 | 0.1718452265214836 | F | F | F |
| 0.3655583378068819 | 0.7590032934704128 | 0.2376322577310569 | T | T | T |
| 0.8231598523375937 | 0.8220173279369773 | 0.3180656501066378 | T | T | T |
| 0.3801333322063450 | 0.8866279657510099 | 0.3662619707074661 | T | T | T |
| 0.1953125813377383 | 0.8018515466180745 | 0.0000000000000000 | F | F | F |
| 0.7413508490531768 | 0.8938395122850622 | 0.0729924168773124 | F | F | F |
| 0.2873782264472950 | 0.9859815616466321 | 0.1459848337546177 | F | F | F |
| 0.8405162742692739 | 0.0858452320434166 | 0.2167817484784086 | T | T | T |
| 0.3549623093866632 | 0.1673010881294724 | 0.2904564644472010 | T | T | T |
| 0.8915599371313202 | 0.1876283585497616 | 0.3710845777742562 | T | T | T |
| 0.2067639675224910 | 0.1579357869491815 | 0.0517596733424099 | F | F | F |
| 0.7527327231151588 | 0.2500778363107514 | 0.1247520902197152 | F | F | F |
| 0.2989066550128996 | 0.3422198856723213 | 0.1977445070970276 | F | F | F |
| 0.8456554786792354 | 0.4357658515717845 | 0.2759849103848624 | T | T | T |
| 0.3644804944445391 | 0.4865847929782016 | 0.3592207737169346 | T | T | T |
| 0.9875370332776032 | 0.8074068714208431 | 0.4250838799360781 | T | T | T |

0.8178842604548074 0.5861498055648086 0.4262715692377580 T T T

**Figure 6. (111)-II**

O La

1.0000000000000000  
6.8234000000000004 0.0000000000000000 0.0000000000000000  
-3.4117236276940459 6.4899793757942073 0.0000000000000000  
0.00000000000000016 0.00000000000000026 25.7149999999999999

La O

12 19

Selective dynamics

Direct

|                    |                    |                    |   |   |   |
|--------------------|--------------------|--------------------|---|---|---|
| 0.9219846346797027 | 0.2553166819266224 | 0.0439432237993387 | F | F | F |
| 0.4681585665774435 | 0.3474587312881923 | 0.1169356406766511 | F | F | F |
| 0.0141859439715617 | 0.4396007806497622 | 0.1898891697452854 | F | F | F |
| 0.5564091864499339 | 0.5297505493961513 | 0.2630329810789271 | T | T | T |
| 0.0310319346453073 | 0.5457613401487446 | 0.3631476998775773 | T | T | T |
| 0.6307263952191534 | 0.7991837459860875 | 0.4034505368245248 | T | T | T |
| 0.4800332923790691 | 0.7044706516406336 | 0.0078164495430713 | F | F | F |
| 0.0260606697731873 | 0.7966127010022035 | 0.0808088664203765 | F | F | F |
| 0.5721759798694777 | 0.8887547503637734 | 0.1538012832976889 | F | F | F |
| 0.1083457185308247 | 0.9769556496561596 | 0.2240935142637632 | T | T | T |
| 0.6402076679196529 | 0.0589768303645736 | 0.2935597521463988 | T | T | T |
| 0.1743133354552441 | 0.0894177792514306 | 0.3703081277680285 | T | T | T |
| 0.7009704423389636 | 0.4798166249363334 | 0.0258603927668659 | F | F | F |
| 0.2469978197330818 | 0.5719586742979033 | 0.0988528096441783 | F | F | F |
| 0.7931131298293721 | 0.6641007236594731 | 0.1718452265214836 | F | F | F |
| 0.3759656310927035 | 0.7590005447371933 | 0.2366471581947852 | T | T | T |
| 0.8223198206090967 | 0.8380838299402765 | 0.3112041967820934 | T | T | T |
| 0.3588160203388229 | 0.8712638035318812 | 0.3655282444652461 | T | T | T |
| 0.1953125813377383 | 0.8018515466180745 | 0.0000000000000000 | F | F | F |
| 0.7413508490531768 | 0.8938395122850622 | 0.0729924168773124 | F | F | F |
| 0.2873782264472950 | 0.9859815616466321 | 0.1459848337546177 | F | F | F |
| 0.8419042880938136 | 0.0916485727822073 | 0.2156940751595769 | T | T | T |
| 0.3548355653878459 | 0.1684873965620212 | 0.2907478920096842 | T | T | T |
| 0.8605654049607754 | 0.1663463086619405 | 0.3764497957137037 | T | T | T |
| 0.2067639675224910 | 0.1579357869491815 | 0.0517596733424099 | F | F | F |
| 0.7527327231151588 | 0.2500778363107514 | 0.1247520902197152 | F | F | F |
| 0.2989066550128996 | 0.3422198856723213 | 0.1977445070970276 | F | F | F |
| 0.8502552199801573 | 0.4349374032554712 | 0.2786746969759836 | T | T | T |
| 0.3746560951561405 | 0.4806255351082029 | 0.3582009924829017 | T | T | T |
| 0.9335612320517834 | 0.7595082937462486 | 0.4139196846859820 | T | T | T |
| 0.3065684146589928 | 0.4547160557792801 | 0.4143434482108956 | T | T | T |

**Figure 6. (111)-III**

O La

1.0000000000000000  
6.8234000000000004 0.0000000000000000 0.0000000000000000  
-3.4117236276940459 6.4899793757942073 0.0000000000000000  
0.00000000000000016 0.00000000000000026 25.7149999999999999

La O

12 19

Selective dynamics

Direct

|                    |                    |                    |   |   |   |
|--------------------|--------------------|--------------------|---|---|---|
| 0.9219846346797027 | 0.2553166819266224 | 0.0439432237993387 | F | F | F |
| 0.4681585665774435 | 0.3474587312881923 | 0.1169356406766511 | F | F | F |

|                    |                    |                    |   |   |   |
|--------------------|--------------------|--------------------|---|---|---|
| 0.0141859439715617 | 0.4396007806497622 | 0.1898891697452854 | F | F | F |
| 0.5517033494016117 | 0.5214818986100270 | 0.2663956701018371 | T | T | T |
| 0.1046687288530019 | 0.5864124421237443 | 0.3495413258789827 | T | T | T |
| 0.6868238121898375 | 0.7996128382575035 | 0.3983784185821501 | T | T | T |
| 0.4800332923790691 | 0.7044706516406336 | 0.0078164495430713 | F | F | F |
| 0.0260606697731873 | 0.7966127010022035 | 0.0808088664203765 | F | F | F |
| 0.5721759798694777 | 0.8887547503637734 | 0.1538012832976889 | F | F | F |
| 0.1060859051355421 | 0.9746796278591815 | 0.2251102121142126 | T | T | T |
| 0.6460082626837932 | 0.0604228572828829 | 0.2919884371256339 | T | T | T |
| 0.2495576280872965 | 0.1278501779775197 | 0.3794688784189245 | T | T | T |
| 0.7009704423389636 | 0.4798166249363334 | 0.0258603927668659 | F | F | F |
| 0.2469978197330818 | 0.5719586742979033 | 0.0988528096441783 | F | F | F |
| 0.7931131298293721 | 0.6641007236594731 | 0.1718452265214836 | F | F | F |
| 0.3594525258285790 | 0.7592611601314780 | 0.2430222435671620 | T | T | T |
| 0.8089652865445277 | 0.8312561494866423 | 0.3079793192010873 | T | T | T |
| 0.4271914338094265 | 0.9093542819094189 | 0.3688859591149634 | T | T | T |
| 0.1953125813377383 | 0.8018515466180745 | 0.0000000000000000 | F | F | F |
| 0.7413508490531768 | 0.8938395122850622 | 0.0729924168773124 | F | F | F |
| 0.2873782264472950 | 0.9859815616466321 | 0.1459848337546177 | F | F | F |
| 0.8401154754216287 | 0.0884661006621535 | 0.2141065331184739 | T | T | T |
| 0.3527561700719036 | 0.1617253074651504 | 0.2929753307331273 | T | T | T |
| 0.9207242850398891 | 0.1959076539299544 | 0.3710171192922685 | T | T | T |
| 0.2067639675224910 | 0.1579357869491815 | 0.0517596733424099 | F | F | F |
| 0.7527327231151588 | 0.2500778363107514 | 0.1247520902197152 | F | F | F |
| 0.2989066550128996 | 0.3422198856723213 | 0.1977445070970276 | F | F | F |
| 0.8543553249297849 | 0.4338470148128635 | 0.2762401466149648 | T | T | T |
| 0.4048960829585156 | 0.4932398504991861 | 0.3636595706298461 | T | T | T |
| 0.9917244997032187 | 0.7579479062164249 | 0.4043594143475883 | T | T | T |
| 0.9549727599935985 | 0.1637342991063245 | 0.4270743082780246 | T | T | T |

**Figure 6. (111)-IV**

O La

|                     |                    |                     |
|---------------------|--------------------|---------------------|
| 1.0000000000000000  |                    |                     |
| 6.8234000000000004  | 0.0000000000000000 | 0.0000000000000000  |
| -3.4117236276940459 | 6.4899793757942073 | 0.0000000000000000  |
| 0.0000000000000016  | 0.0000000000000026 | 25.7149999999999999 |

La O

12 19

Selective dynamics

Direct

|                    |                    |                    |   |   |   |
|--------------------|--------------------|--------------------|---|---|---|
| 0.9219846346797027 | 0.2553166819266224 | 0.0439432237993387 | F | F | F |
| 0.4681585665774435 | 0.3474587312881923 | 0.1169356406766511 | F | F | F |
| 0.0141859439715617 | 0.4396007806497622 | 0.1898891697452854 | F | F | F |
| 0.5445353849956289 | 0.5221981034594627 | 0.2664781620245307 | T | T | T |
| 0.0389343555283244 | 0.5365401217408904 | 0.3589829452368120 | T | T | T |
| 0.6500211871334574 | 0.7840178094015786 | 0.4011631167530947 | T | T | T |
| 0.4800332923790691 | 0.7044706516406336 | 0.0078164495430713 | F | F | F |
| 0.0260606697731873 | 0.7966127010022035 | 0.0808088664203765 | F | F | F |
| 0.5721759798694777 | 0.8887547503637734 | 0.1538012832976889 | F | F | F |
| 0.1081040647689038 | 0.9716051210288252 | 0.2243990808348483 | T | T | T |
| 0.6526368389641198 | 0.0611236425868437 | 0.2922508759714652 | T | T | T |
| 0.2047050744760343 | 0.1134576104154418 | 0.3737377274819717 | T | T | T |
| 0.7009704423389636 | 0.4798166249363334 | 0.0258603927668659 | F | F | F |
| 0.2469978197330818 | 0.5719586742979033 | 0.0988528096441783 | F | F | F |
| 0.7931131298293721 | 0.6641007236594731 | 0.1718452265214836 | F | F | F |
| 0.3698779284224296 | 0.7630217486711494 | 0.2390240728108125 | T | T | T |

|                    |                    |                    |   |   |   |
|--------------------|--------------------|--------------------|---|---|---|
| 0.8089204120719016 | 0.8285037990293532 | 0.3100545212507611 | T | T | T |
| 0.3756703666766332 | 0.8825895279656023 | 0.3654667625966742 | T | T | T |
| 0.1953125813377383 | 0.8018515466180745 | 0.0000000000000000 | F | F | F |
| 0.7413508490531768 | 0.8938395122850622 | 0.0729924168773124 | F | F | F |
| 0.2873782264472950 | 0.9859815616466321 | 0.1459848337546177 | F | F | F |
| 0.8431234470672618 | 0.0902010648614056 | 0.2150614881576724 | T | T | T |
| 0.3547266482755227 | 0.1617307663328567 | 0.2919169945240237 | T | T | T |
| 0.8954360006361497 | 0.1766635835169396 | 0.3742356423715060 | T | T | T |
| 0.2067639675224910 | 0.1579357869491815 | 0.0517596733424099 | F | F | F |
| 0.7527327231151588 | 0.2500778363107514 | 0.1247520902197152 | F | F | F |
| 0.2989066550128996 | 0.3422198856723213 | 0.1977445070970276 | F | F | F |
| 0.8493813555859998 | 0.4311192207567600 | 0.2774968756599135 | T | T | T |
| 0.3739862399101446 | 0.4823638923477132 | 0.3640891806169650 | T | T | T |
| 0.9356967477133450 | 0.7285849255434850 | 0.4113405360278266 | T | T | T |
| 0.4209802964911046 | 0.9615015785403693 | 0.4200963562523307 | T | T | T |
